# Supplementary material for: A Review of the Updated Pharmacophore for the Alpha 5 GABA(A) Benzodiazepine Receptor Model
Source: PubMed Central journal article supplement (PMC4657098; doi:10.1155/2015/430248), 2015-11-10
Supplement: 430248.f1.pdf [file 430248.f1.pdf]

## **A Review of the Updated Pharmacophore for the Alpha 5 GABA(A) Benzodiazepine Receptor Model**

Clayton, Terry<sup>1†</sup>; Poe, Michael M.<sup>1†</sup>; Rallapalli, Sundari<sup>1</sup>; Biawat, Poonam<sup>1</sup>; Savić, Miroslav M.<sup>2</sup>; Rowlett, James K.<sup>3</sup>; Gallos, George<sup>4</sup>; Emala, Charles W.<sup>4</sup>; Kaczorowski, Catherine C.<sup>5</sup>; Stafford, Douglas C.<sup>6</sup>; Arnold, Leggy A.<sup>1,6</sup>; and Cook, James M.<sup>1,6\*</sup>

<sup>1</sup>Department of Chemistry and Biochemistry, University of Wisconsin-Milwaukee, Milwaukee, Wisconsin, 53201; <sup>2</sup>Department of Pharmacology, Faculty of Pharmacy, University of Belgrade, Belgrade, Serbia; <sup>3</sup>Department of Psychiatry and Human Behavior, University of Mississippi Medical Center, Jackson, Mississippi, 39216; <sup>4</sup>Department of Anesthesiology, Columbia University, New York, New York, 10032; <sup>5</sup>Department of Anatomy and Neurobiology, University of Tennessee Health Science Center, Memphis, Tennessee, 38163; <sup>6</sup>Milwaukee Institute of Drug Discovery, University of Wisconsin-Milwaukee, Milwaukee, Wisconsin, 53201.

† These authors contributed equally to this work.

\*Corresponding author, Department of Chemistry and Biochemistry, University of Wisconsin-Milwaukee, Milwaukee, Wisconsin, 53201, [capncook@uwm.edu](mailto:capncook@uwm.edu)

# Supporting Information

**With References and Appendices.**

## Comparative Model of the Benzodiazepine Binding Site

A crystal structure of the heteropentameric GABA(A) receptors has not been reported so far, however the structure determination of the similar acetylcholine binding protein (AChBP)<sup>1</sup> has been of great interest for the GABA(A) receptor researchers. A homopentamer of the GABA channel with the  $\beta 3$  subunit has been solved by Miller et al. (*Nature* 2014). The AChBP protein shares less than 20% sequence homology with the extracellular domain of the GABA(A) receptor,<sup>2</sup> however the overall structural similarity is estimated to be around 60 – 75 %.<sup>2</sup> Comparative modeling studies have been carried out that used the structure of AChBP to develop models of the extracellular domain of GABA(A)R.<sup>1, 3, 4</sup> In addition, electron cryomicroscopy (cryo-EM) structures that represent the extracellular and transmembrane portion of the nACh receptor were used the modeling of GABA(A) receptors.<sup>2</sup> However, the homology of the sequence is not very high, making the prediction of detailed features highly uncertain. Therefore, docking studies with Bz BS ligands<sup>5</sup> have a more qualitative character and do not explain all differential interactions of GABA(A)R ligands with the existing subdomains. Different experimental structures of the nAChR<sup>1, 2, 6</sup> demonstrated the structure variation of between members of the same family,<sup>1, 2, 6</sup> which can help us to extrapolate to which extent GABA(A) receptor subunits differ from each other.

The majority of Bz/GABA(A)R have  $1\gamma$ ,  $2\alpha$  and  $2\beta$  subunits and each domain has a “plus” and a “minus” side (Figure 1). As a consequence, each subdomain interfaces with the plus and minus sides of neighboring subdomains. The Bz binding site can be found between the  $\alpha^+\gamma^-$  subunits and is significantly bigger but similar to the two GABA binding pockets, which are positioned between the  $\beta^+\alpha^-$  subunits.<sup>6-8</sup> Overall, the coordination of the  $\alpha 1\beta 2\gamma 2$  GABA(A) receptor can be described as  $\gamma\beta\alpha\beta\alpha$  started counter clockwise from plus to minus (Figure 1).<sup>4, 5, 9, 10</sup>

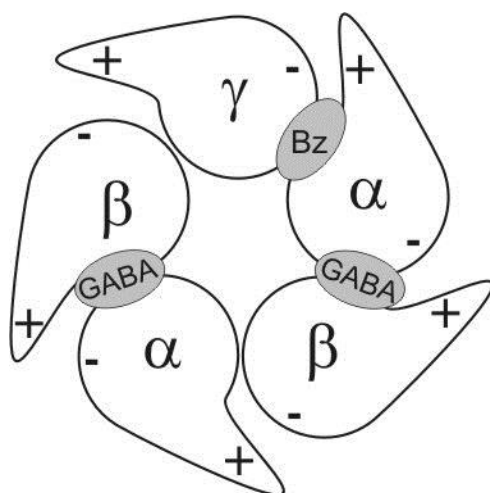

Figure 1. Absolute subunit arrangement of the  $\alpha 1\beta 2\gamma 2$  GABA(A) receptor when viewed from the synaptic cleft.<sup>25</sup>

The GABA(A) binding sites are located at the  $\beta^+\alpha^-$  subunit interfaces and the modulatory benzodiazepine binding site is located at the  $\alpha^+\gamma^-$  subunit interface.

The  $\gamma_2$  subdomain is important for interacting the benzodiazepines in addition to many other molecules that act via the Bz BS.<sup>11, 12</sup> Sequence variations that differ between  $\alpha$  and  $\gamma$  subdomains are responsible for the subtype selectivity and efficacy of Bz BS ligands.<sup>11-14</sup> Three segments have been proposed to generate the Bz BS: 1) The  $\alpha^+$  side, 2) the loops A, B and C, and 3) three segments of the  $\gamma^-$  called loops D, E and F.<sup>11, 12</sup> X-ray crystallography and EM-structures AChBP<sup>1</sup> and the nAChR<sup>15</sup> confirmed these segments, which create a groove-like pocket between subdomains and that are conserved among the entire superfamily. Trudell and Hagen proposed a near planar cleft BzR binding sites in 1980.<sup>16, 17</sup>

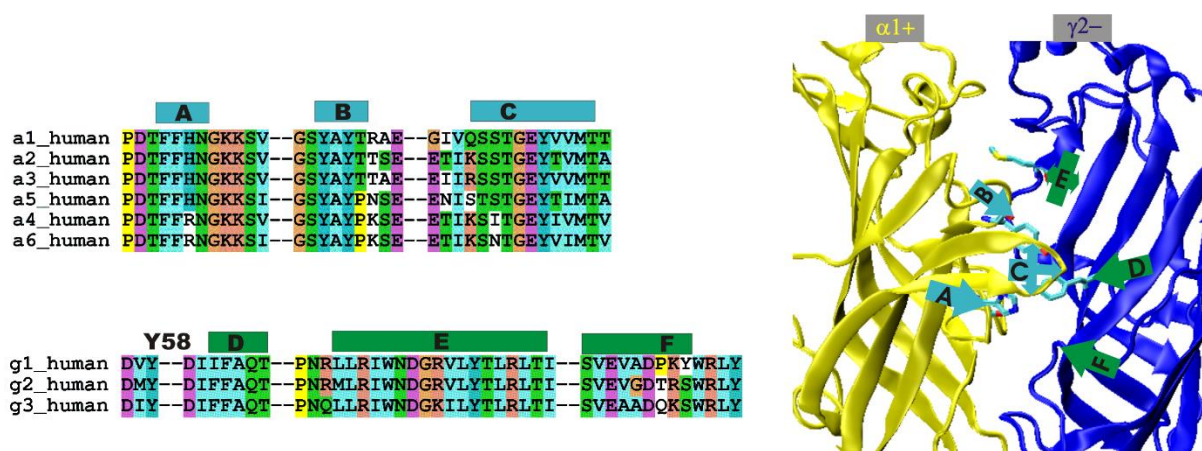

Figure 2. Alignment and homology model depiction of the so called “loops A-F” and flanking regions of the human sequences of the Bz recognition site in different subunits.<sup>1,11-15,25</sup>

View of the homology model (Figure 2) with the channel in between units. The membrane can be pictured parallel to the top edge of the structure. Stick representation is used for key residues: Loop A His102, loop B Tyr 160 and loop D Phe77.

After the nAChR structure was available, newer reports of liganded AChBP crystal structures were published.<sup>18</sup> Importantly, these structures showed that the local conformation of the BS is influenced by the ligand. This is particularly the case for the loop C. Thus, this highly mobile structure element responds towards ligand binding and induces smaller changes along its boundary.<sup>18</sup> This phenomena has been observed for other receptors as well and it has been hypothesized that low energy conformers can be separately stabilized by different ligands. Unfortunately, *a priori* prediction of the appropriate conformer/ligand pair is not conclusive at this time. The models can predict changes in binding sites as large as 40% and distances of key residues can vary several Ångstroms.

Small changes of the protein conformation can severely change the efficacy of Bz BS ligands.<sup>19</sup> In addition, GABA(A) receptor ligands have different efficacies towards particular GABA(A) receptor subtypes.<sup>20, 21</sup> The stabilization of the active state can be as small as 1 kcal/mol underlining the fact that proteins are inherently dynamic and can adopt many

conformations.<sup>22</sup> Therefore, the prediction of the absolute assignments of specific side chains to specific descriptors for any particular conformation is not possible at present. However, a “suggested” orientation of the pharmacophore in the receptor can be predicted implying conformational flexibility of residues that satisfy pharmacophoric descriptors. The combination of a pharmacophore model and a homology results in a model that assigns large lipophilic areas to specific regions and enables flexible assignment of for instance H-bond bridges or  $\pi$ - $\pi$  stacking. Water molecules can significantly complicate prediction of binding. Therefore, our group favors the pharmacophore/receptor models for drug design based on the rigid planar ligands ( $K_i = 5\text{nM}$ – $20\text{nM}$ ) that have introduced by Trudell et al.<sup>17</sup>

### **Relative Orientation of the Pharmacophore within the Comparative Model**

The Milwaukee group published a review prior to structure determination of the AChBP that included results of site-directed mutagenesis and gave valuable insights in respect to important side chains that formed the Bz BS and represent pharmacophoric descriptors.<sup>23</sup> The combination of that model and the recent homology models to lymnea AChBP,<sup>2</sup> aplysia AChBP and the nAChR<sup>24</sup> resulted in a novel model that is discussed here. Experimental evidence induces some degree of conformational flexibility of the model that hint towards variable assignments for H-bridge interactions. In addition, specific areas of lipophilic interactions create a binding site geometry flanked by particular amino acid residues (Figure 3).

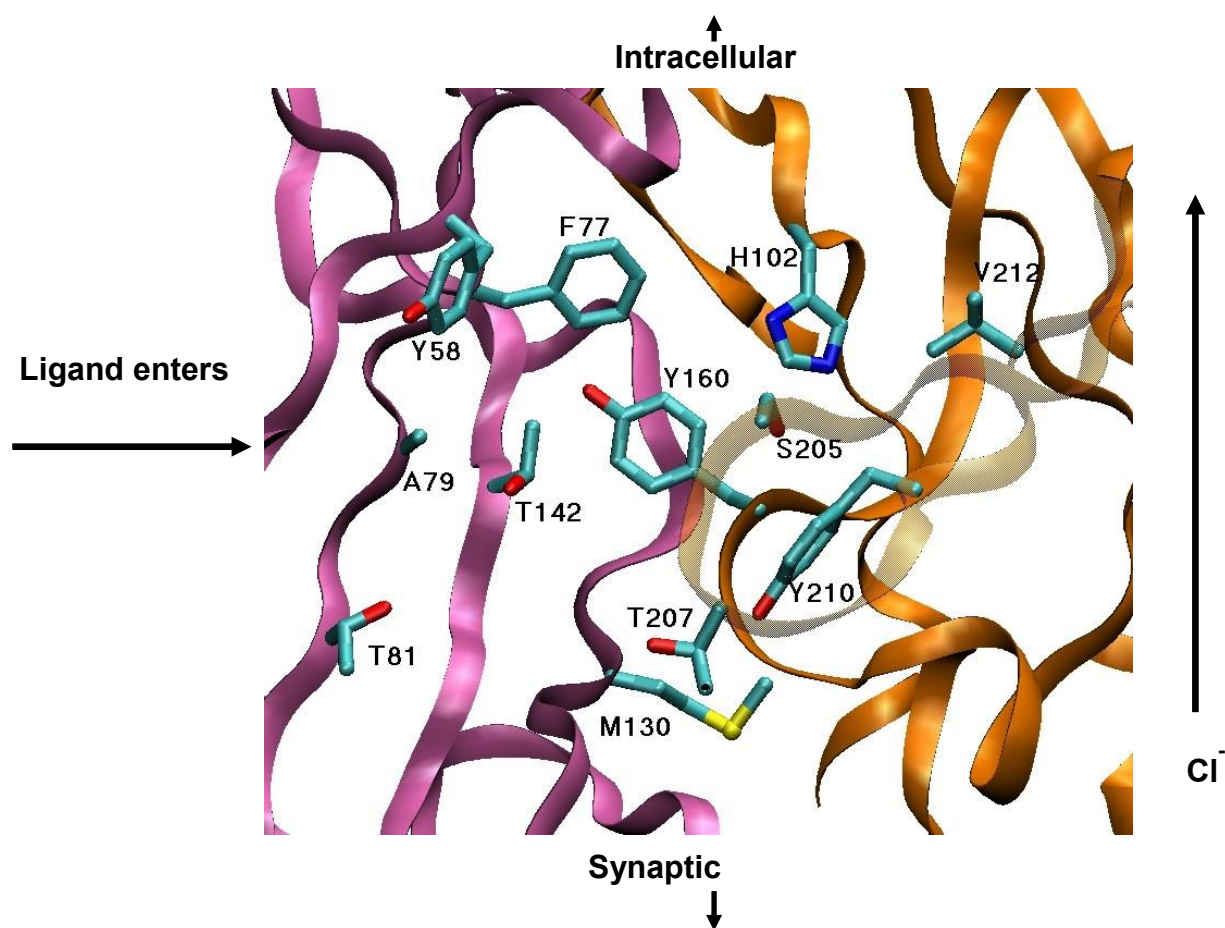

Figure3. Ribbon illustration of the GABA(A) BzR binding pocket conceived by Clayton et al.<sup>25</sup>

### Combining Homology Model and Experimental Evidence

Docking of diazepam and flumazenil was performed to test our computational ligand docking to homology models as described by the two assignments above. Different models based on different templates were used<sup>1, 15, 18</sup> and the top 100 ligand poses per model were retained. A query among these poses was conducted based on the following parameters: The ring conformation of diazepam or flumazenil (Figure 4) should be in the active state;<sup>26</sup> residues  $\alpha$ 1H102/ $\alpha$ 1V203 and  $\alpha$ 1Y210/ $\alpha$ 1V212 are new the substituent in the seven position (consistent with the covalent labeling data); the 3'-ester group of flumazenil is near residues  $\gamma$ 2A79 and  $\gamma$ 2T81. The resulting docking poses were consistent with all covalent labeling studies and the steric requirements of 3' substituted imidazobenzodiazepines<sup>27</sup> binding.



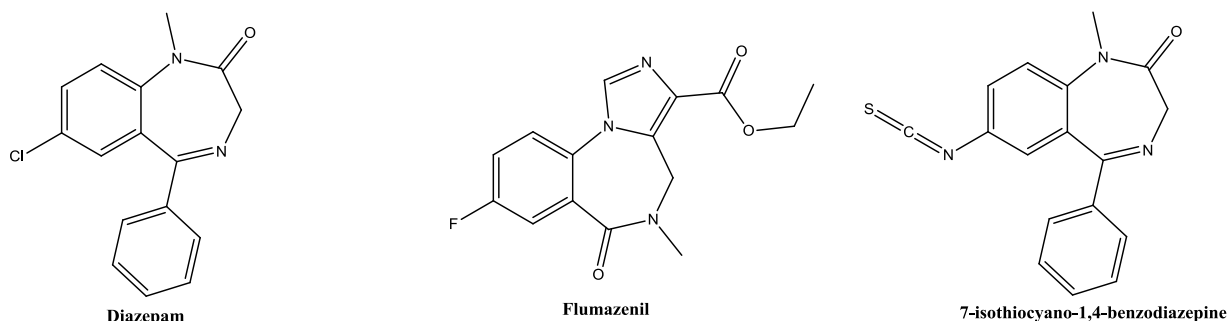

**Figure 4. Structures of BZDs.**

All poses were found in the database. Representatively, diazepam is shown in Figure 5.

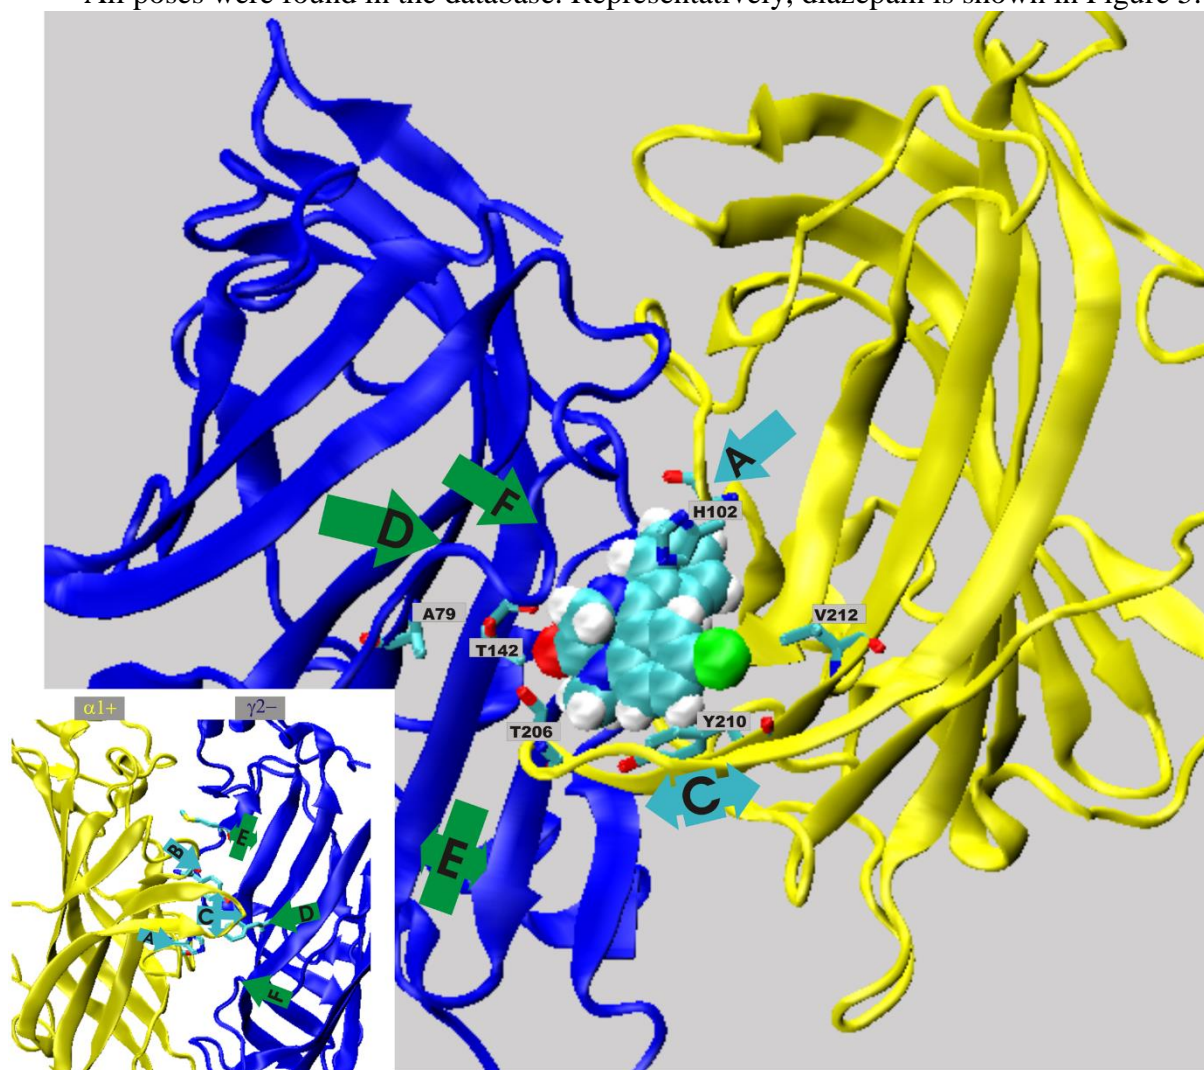

**Figure 5. Diazepam docking pose in  $\alpha 1\gamma 2$ . The beta subunit is not in the binding pocket.<sup>25</sup>**

In Figure 5, diazepam was shown as space filling structure (turquoise: carbon, white: hydrogen, green: halogen, red: oxygen, and blue: nitrogen). The receptor was presented at ribbon with key amino acids in stick representation. The insert figure represents the empty pocket in the

“upright” position. This orientation is different from the main figure, where the structure has been turned and tilted to bring diazepam into the orientation of the unified pharmacophore model. In this orientation, His102 and Thr207 satisfy  $H_2$  and  $H_1$ , respectively, and His 102, Val 212 and Tyr 210 would represent  $L_2$  a hydrophobic pocket. This orientation of the 7-substituted reactive compounds such as isothiocyanate (see Figure 4, third structure) is in position to react with His102, Tyr 210, Val 212, and Val 203. This orientation was developed in collaboration with Professor Werner Seighart.<sup>25</sup>

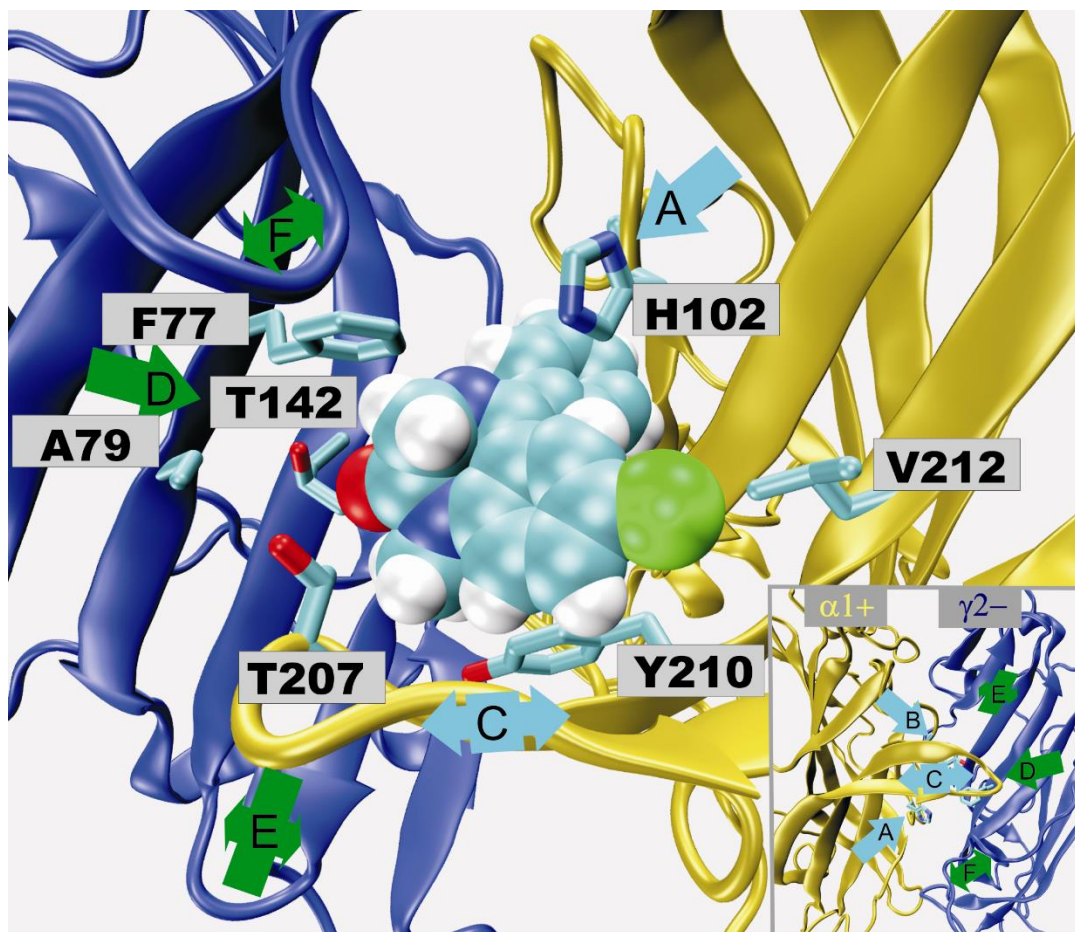

Figure 6. High resolution image of diazepam docking pose in  $\alpha 1\gamma 2$  binding pocket.<sup>25</sup>

The docking pose in Figure 6 and similar predictions satisfy the two definitions for  $L_2$  and  $A_2$  that are discussed above and the following descriptors:  $H_1$  is aligned with the side chains near the top of loop C, the  $L_{DI}$  region is close the subdomain interaction (the  $\alpha 1$  loop B (Y160) and the  $\gamma 2$  region are forming the sheet involving M130, T142 and F77);  $A_2$  is represented by H-bond interaction near  $\alpha 1Y160$ ,  $\gamma 2A79$ ,  $\gamma 2T81$ ,  $\gamma 2M130$  and  $\gamma 2T142$ . If these proximity relations that are found in the docking poses are compared with the unified pharmacophore model we can predict the following orientation the residues.





of experimental data and the comparative model of the  $\alpha 1\beta 2\gamma 2$  GABA(A). The ligand is diazepam. It is possible that more than one side chain could satisfy the same descriptor because inverse agonists stabilize protein conformations that vary from the conformations preferred by agonists,

In addition, there is still some degree of variation in structural details of the poses that represent this orientation. The factors of these structure variations: template and alignment choices, construction of the model and its refinement, and docking algorithms.

With the alignment of XLi-093 and docked Ro15-1788,<sup>25</sup> it becomes clear that these compounds are able to orientate towards the extracellular domain instead of solvent accessible space through the subunit boundary. Orientations of the pharmacophore model inside the structural model of the GABA(A) receptor have been proposed in the past.<sup>28-30</sup>

Current refinements of the predicted protein-ligand complexes with the support of the unified pharmacophore model is a promising approach to create 3D structures that are more accurate and applicable for structure-guided drug design. New approaches that combine protein modeling and pharmacophore elucidation are currently investigated.

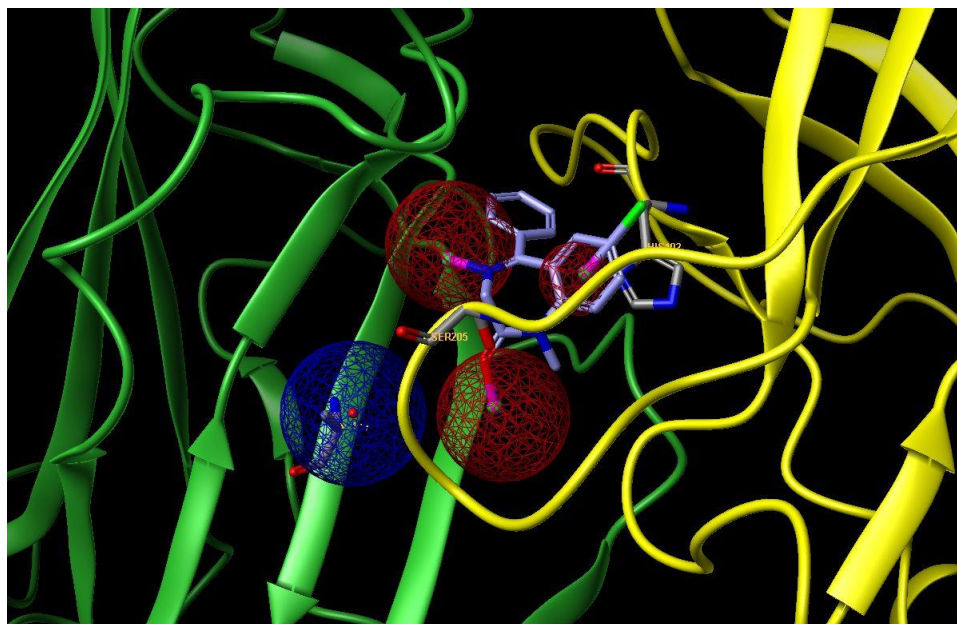

Figure 8. Unified model of the  $\alpha 1\gamma 2$  subtype benzodiazepine receptor with diazepam docked in the binding site.

### Construction of the Unified Pharmacophore/Receptor Model

The 150+ BZ ligands<sup>31, 32</sup> that belong to fifteen different scaffolds were used to create a unified pharmacophore/receptor model. The relative affinities, efficacies and functional effects from ligands of the same structural class at the diazepam-sensitive and diazepam-insensitive benzodiazepine receptor binding sites applied. In addition, we took the approximate locations of descriptors (hydrogen bond donor sites, hydrogen bond acceptor sites, lipophilic regions, and regions of steric repulsion) that were based primarily on in vitro binding affinities in account. The compounds from different scaffolds were superimposed in order to satisfy the same descriptors, creating the unified pharmacophore model this included the rigid planar templates ( $K_i = 5\text{nM}-20\text{nM}$ ) of Trudell.<sup>17</sup>

The model has two hydrogen bond donating groups (H<sub>1</sub> and H<sub>2</sub>), one hydrogen bond accepting group (A<sub>2</sub>) and one lipophilic site (L<sub>1</sub>). There are also lipophilic regions of interaction (L<sub>2</sub>, L<sub>3</sub>, L<sub>4</sub>, and L<sub>Di</sub>) and regions of negative steric repulsion (S<sub>1</sub>, S<sub>2</sub> and S<sub>3</sub>). Important for positive allosteric modulation are occupation of L<sub>2</sub> and/or L<sub>3</sub>, and L<sub>4</sub> as well as interactions at H<sub>1</sub>, H<sub>2</sub>, and L<sub>1</sub>. Inverse agonists only require interactions with the H<sub>1</sub>, L<sub>1</sub>, and A<sub>2</sub> descriptors for good activity *in vivo*.<sup>33-37</sup> The L<sub>3</sub> region is lipophilic of nature differentiating diazepam sensitive (DS) and the diazepam insensitive (DI) coordination. Figure 8 depicts the relative locations of the different descriptors and regions and classes of ligands for GABA(A) R are shown in Table 1.

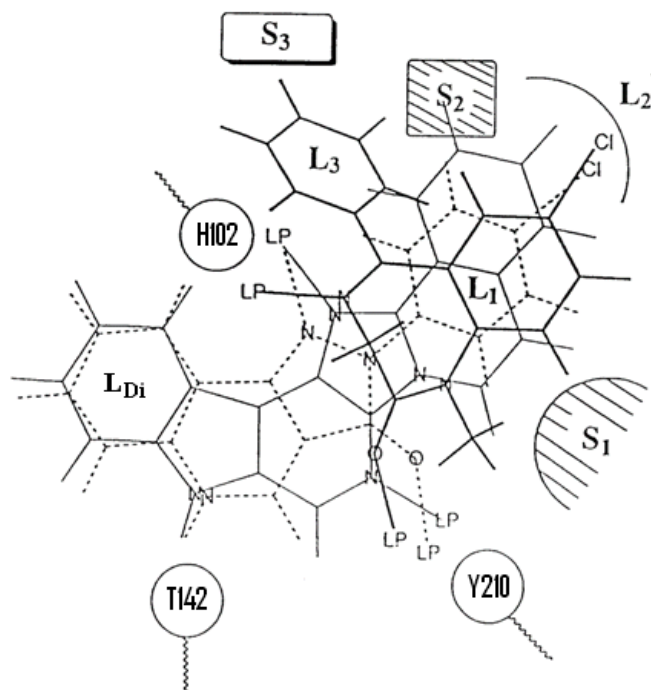

Figure 8. The Milwaukee-based unified pharmacophore.<sup>25</sup>

Table 1. Structures of ligands and their modulation at the  $\alpha 1$  subtype.<sup>25</sup>

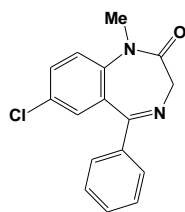

diazepam  
agonist

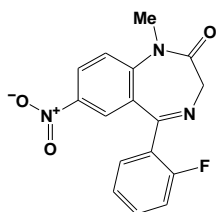

flunitrazepam  
agonist

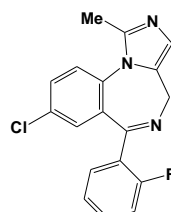

midazolam  
agonist

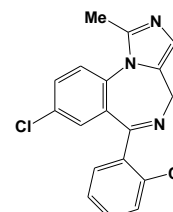

triazolam  
agonist

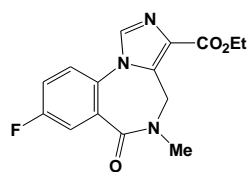

Ro15-1788  
antagonist

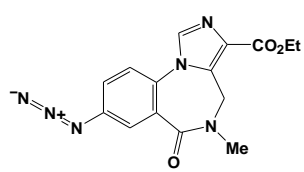

Ro15-4513  
inverse agonist

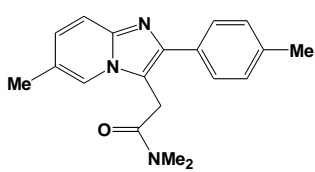

zolpidem  
agonist

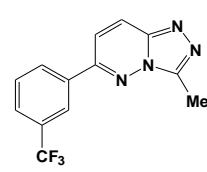

CL-218,872  
partial agonist

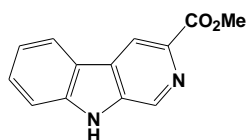

$\beta$ -CCM  
inverse agonist

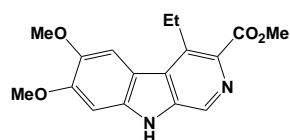

DMCM  
inverse agonist

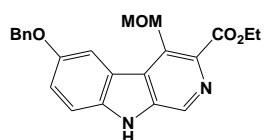

ZK-93423  
agonist

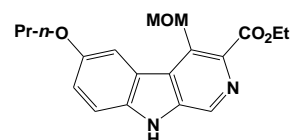

6-PBC  
partial agonist

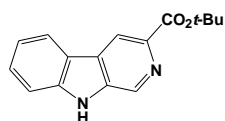

$\beta$ -CCT  
antagonist

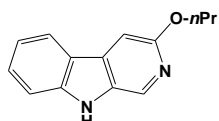

3-PBC  
antagonist

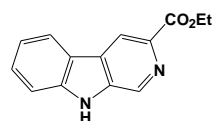

$\beta$ -CCE  
inverse agonist

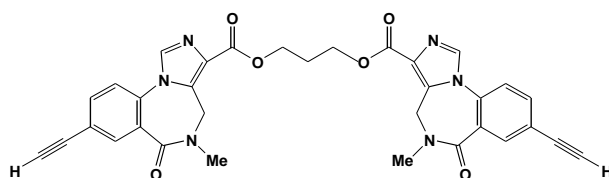

XLi-093  
antagonist at  $\alpha 5$

The alignments of several Bz BS ligands within this model are shown in Figure 9.

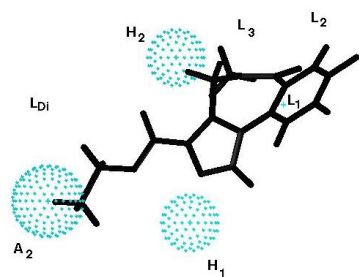

Ro 15-1788

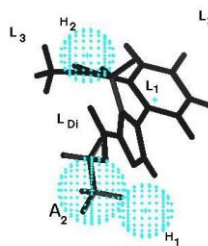

Ro 15-1788 rotated 90°

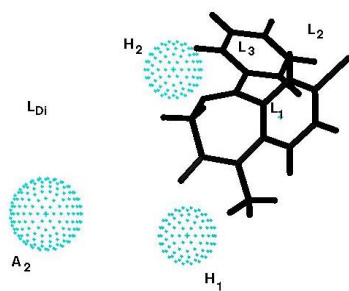

diazepam

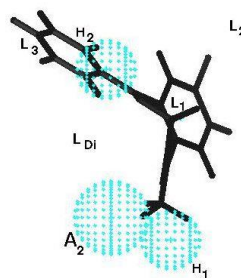

diazepam rotated 90°

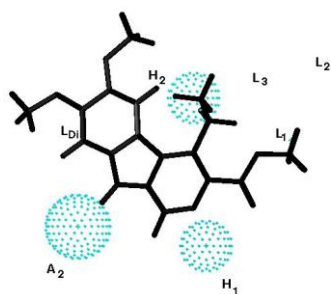

DMCM

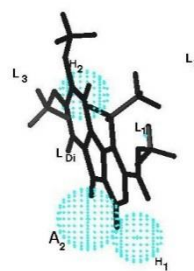

DMCM rotated 90°

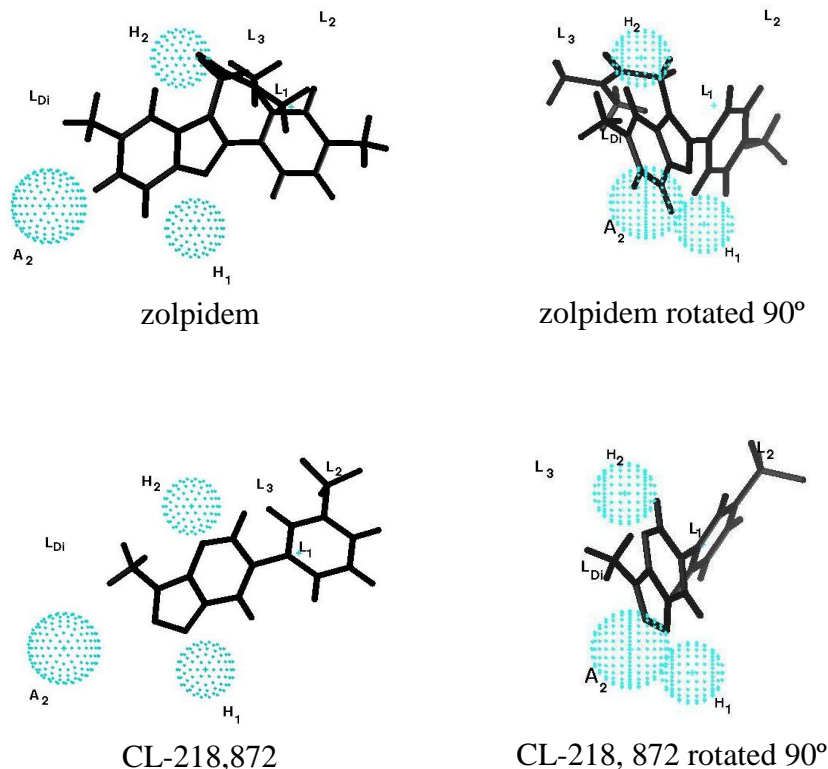

**Figure 9. Alignments of several Bz BS ligands within the pharmacophore model.<sup>25</sup>**

A unified pharmacophore model incorporating many substance classes that act at the DS and DI benzodiazepine binding sites of GABA(A) receptors has been updated to include new substance classes. Compound development guided by this pharmacophore model has led to new agents with interesting pharmacological profiles, particularly enhanced preference for  $\alpha 2$  or  $\alpha 5$  containing GABA(A) receptor subtypes. Based on the evaluation of experimental data and comparative models of the  $\alpha 1\beta 2\gamma 2$  GABA(A) receptor, the location of several residues relative to the descriptors of the pharmacophore/receptor model has been proposed. Although no absolute assignments were made regarding which amino acids satisfy the pharmacophoric descriptors, experimental data strongly indicated definite trends with regard to how ligands of varying pharmacological activity are oriented within the receptor. Because the unified pharmacophore/receptor model accounts for the binding and activity profiles at the six GABA(A) receptor subtypes containing any one of the different alpha subunits, the proposed orientation should also be similar within the different models<sup>1</sup> of the various receptor subtypes. Information to be immediately gained from these proposed orientations can have far reaching benefits, not only for the rational design of selective ligands and the interpretation of ligand docking results, but also for the identification and evaluation of possible roles certain residues may have within the pocket. As structure determination of the GABA(A) receptor is eagerly awaited, it is hoped that these proposed orientations may be used by others to gain additional insight into the potential mechanisms underlying binding and modulation at the Bz site, all of



which will lead to a better understanding of the structure and function of GABA(A) receptors. In the next section the methods used to build the protein model will be explained.

### Homology Models of the Benzodiazepine Receptor

The  $\gamma$ -aminobutyric-acid (GABA(A) and GABA<sub>C</sub>) pentameric ligand gated ion channels are members of a superfamily of allosteric transmembrane proteins which includes the nicotinic acetylcholine (nAChR), serotonin 5-HT<sub>3</sub>, and glycine receptors. Electrophysiological data on GABA(A) is available but attempts at atomic resolution to acquire structural data have so far been unsuccessful. However, in 2001 Smit<sup>38</sup> discovered a homologue of the nACh receptor ligand-binding domain from the snail *Lymnaea stagnalis*. Acetylcholine-binding protein (AChBP) is produced in the glial cells of *Lymnaea stagnalis*. In the synaptic cleft, AChBP modulates synaptic transmission. Subunits of the snail glial cells form a stable homopentamer with conserved N terminal domains. Known agonists and antagonists of nAChRs bind to the homologue. For this reason, it is a valuable template for modeling the N-terminus domains of pentameric ligand gated ion channels.

Brejč *et al.* successfully solved the crystal structure of AChBP by X-ray crystallography using weak Pb multiple wavelength anomalous diffraction (MAD) data in two crystal forms.<sup>1</sup> The crystals were grown at room temperature using the hanging-drop vapour diffusion technique. The crystal structure revealed a radially symmetric homopentamer with extracellular dimensions of the nicotinic acetylcholine receptor (nAChR) which correlated with measurements taken using electron microscopy.<sup>1</sup>

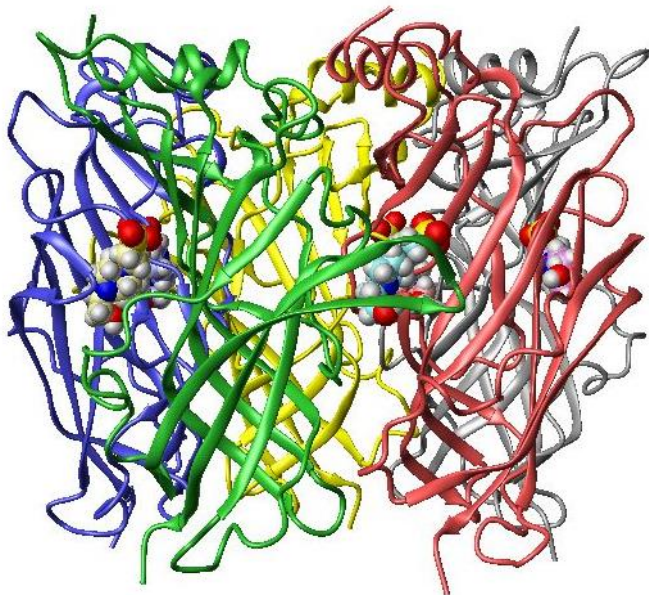

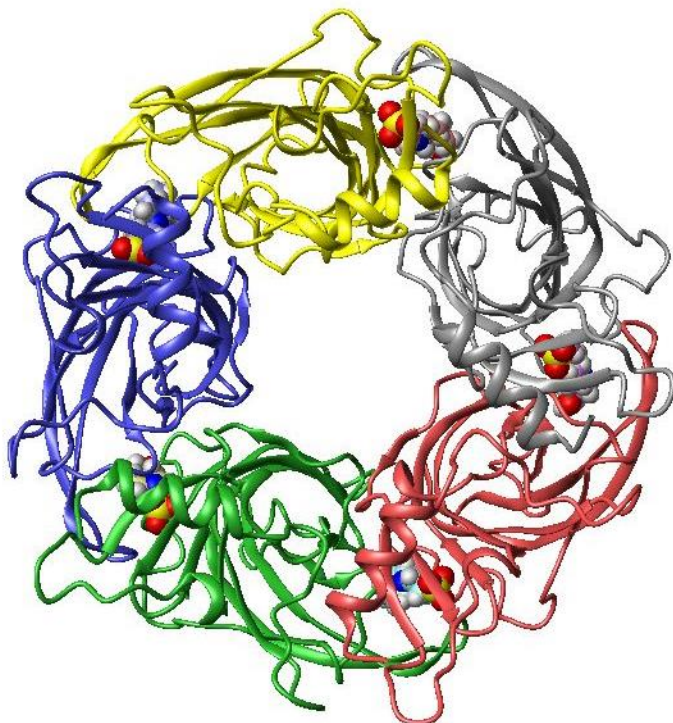

**Figure 10. Orthogonal views of the homopentameric acetylcholine binding protein crystallized from *Lymnaea stagnalis*. The subunits have been assigned different colors for clarity.<sup>2</sup>**

Subunits are homologous and have been colored by chain to distinguish them. In space filling models, HEPES (N-2-hydroxyethylpiperazine-N'-2-ethanesulphonic acid (present during the crystallization process) can be seen bound in the ligand binding site (Figure 10) between each subunit interface.<sup>2</sup>

The N terminus is located at the “mouth” of the ion channel in the synaptic cleft. A molecule of HEPES was present in the acetylcholine binding pocket. This was verified as the residues implicated with agonist binding in nAChR and AChBP were conserved in the receptor. The residues lie in four regions identified as loops A, B, C, and D. Loops A, B, and C are located on what is referred to as the ‘plus’ face while loops D, E, and F lie on the ‘minus’ face (see Figures 11 and 12). In the heteromeric nAChR, agonist binding takes place between the ‘plus’ face of a subunit and the ‘minus’ face of an  $\alpha$  or  $\gamma$  subunit. Site directed mutagenesis and radioligand binding assays have established that residues of the GABA(A) receptor involved in ligand binding align with residues in loops A, B, and C of the  $\alpha$  subunit and loops D and E of the  $\gamma$  subunit.<sup>2, 23, 25</sup>

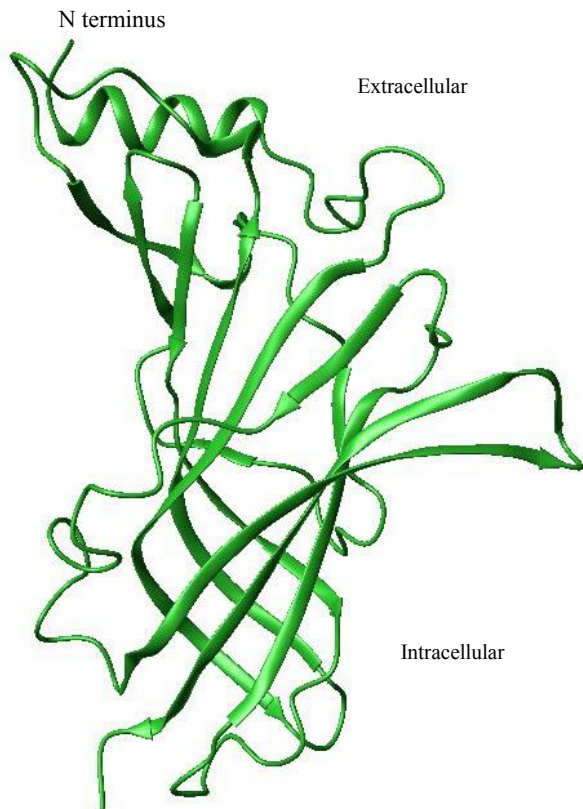

**Figure 11. Single subunit of acetylcholine binding protein crystallized from *Lymnaea stagnalis* (side view).**<sup>2,23</sup>

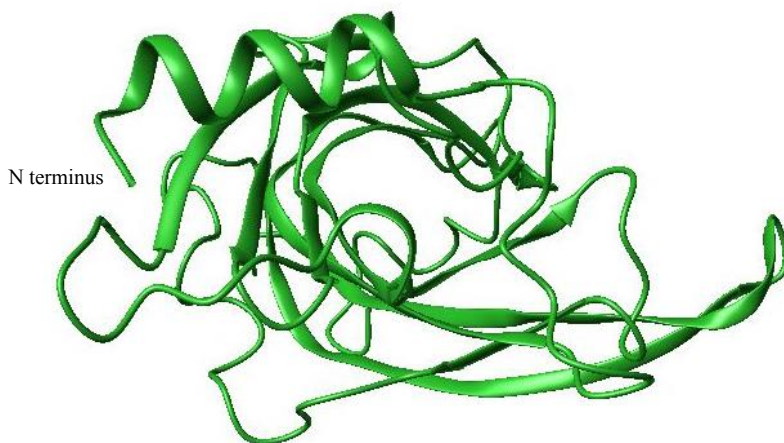

**Figure 12. Single subunit of acetylcholine binding protein crystallized from *Lymnaea stagnalis* (top view).**

Since the AChBP is a member of the Cys-loop LGIC superfamily it offers a template for building models of the the ligand binding domains of the Cys-loop superfamily. The AChBP was used to build homology models of the subtypes of the GABA(A) receptors. The ligand binding domains of human GABA(A) receptors ( $\alpha 1$ ,  $\alpha 2$ ,  $\alpha 3$ ,  $\alpha 5$ ,  $\beta 2$ , and  $\gamma 2$ ) were obtained from the Research Collaboratory for Structural Bioinformatics (RCSB). Originated in 1971 at

Brookhaven National Laboratories, this is the home of the Protein Data Bank. The PDB archive is the repository of information about the 3D structures of large biological molecules such as proteins and nucleic acids. With the protein sequences in hand, a critical first step in building a homology model is to align the raw protein sequence with the protein sequence of a target protein or template structure. Alignments are prepared using multiple sequence alignment software for DNA and proteins.<sup>39</sup>

After calculating the best match for the selected sequences, they are lined up so identities, similarities, and differences can be seen. Programs which perform this include MAFFT, Muscle, Multalin, ClustalW, and BlastAlign (<http://pbil.univ-lyon1.fr/alignment.html>). Templates can also be found by performing a query of the raw protein sequence against the Protein databank. This is performed using the protein database search program, Gapped Blast.<sup>39, 40</sup> The report will contain a list of sequences producing significant alignments, PDB code, protein description, a normalized alignment score and an Expect (E) value. In general, a lower E score describes the background noise that exists between sequences. A lower E value correlates to a more significant score. Once a proper alignment of protein sequences was performed, the raw protein sequence was threaded onto the AChBP using Deep View. The crystal structure of the AChBP was downloaded from the Swiss Protein Databank Viewer. Deep View is a Swiss Protein Databank Viewer (<http://ca.expasy.org/spdbv>). Threading is performed after the alignment is complete. Amino acids which have been identified as equivalent between the proteins are “fit”. This is similar, but more precise than the “3 corresponding atoms” technique. Deep View includes a tool, *Magic Fit*,<sup>39</sup> which performs the threading procedure for all residues across a raw sequence and a reference protein. Once the preliminary model has been built, a manual inspection can be performed. Considerations during manual inspection include, identifying areas of low homology, and manually aligning gap regions with loops in the reference protein.<sup>39, 40</sup> Loop regions which correspond to gaps were in the alignment can be modeled by fitting structures from a loop database. In the current model, loop regions were mapped to a loop database by Cromer et al.<sup>2, 15</sup>

Upon completion of the preliminary model, the following properties can be studied using Deep View and Sybyl<sup>25</sup>:

1. Surface hydrophobicity
2. Solvent accessibility of N-glycosylation sites after pentamer assembly
3. Acidic, basic, and non polar maps
4. Sybyl X minimizations
5. Steric clashes
6. RMSD of alpha carbons
7. Location of disulfide bonds

In order to improve the prediction of areas of low homology PHD was utilized by Cromer et al.<sup>2, 39, 40</sup> PHD or more commonly referred to as PredictProtein is a sequence analysis tool and the prediction of protein structure and function. Protein sequences or alignments are submitted to Columbia University; PredictProtein returns multiple sequence alignments, PROSITE sequence motifs, low-complexity regions (SEG), nuclear localisation signals, regions lacking regular structure (NORS) and predictions of secondary structure, solvent accessibility, globular regions, transmembrane helices, coiled-coil regions, structural switch regions, disulfide-

bonds, sub-cellular localization, and functional annotations. Upon request the Rost group will perform fold recognition by prediction-based threading, CHOP domain assignments, predictions of transmembrane strands and inter-residue contacts are also available. PredictProtein is run by Burkhard Rost at Columbia University in New York ([www.rostlab.org](http://www.rostlab.org)).<sup>40</sup> As an alternative, Swiss Model can be used to model subunit loop regions by searching structures from loop databases.

Once subunits were completed, a pentamer was constructed taking into consideration residues determined experimentally to be present in the allosteric and GABA binding site. On the  $\alpha$  subunit, this includes  $\alpha$ Tyr160,  $\alpha$ Tyr210,  $\gamma$ Phe77, and  $\alpha$ Ser205.<sup>23, 25</sup> After manually assembling the subunits and comparing an overlay with AChBP, the structure was energy minimized.<sup>25, 39</sup>

With protein receptor models for  $\alpha 1\beta 3\gamma 2$ ,  $\alpha 2\beta 3\gamma 2$ ,  $\alpha 3\beta 3\gamma 2$ , and  $\alpha 5\beta 3\gamma 2$  completed a truly *unified* pharmacophore model was assembled for each receptor subtype. Using the Tripos Biopolymer software, the pharmacophore was manually aligned into each protein. With mutagenesis data on residue interaction on key ligands, the pharmacophore was carefully adjusted so as to recreate the protein-ligand interactions discussed previously. The protein models below represent the cumulative results of over 20 years of research. The proteins are oriented with the  $\gamma 2$  on the left and the  $\alpha$  subunit on the right with loop C reaching over the middle to  $\gamma 2$ . Diazepam has been docked in each receptor and the pharmacophore is visible.

### **Protein Models of the $\alpha 1\beta 3\gamma 2$ , $\alpha 2\beta 3\gamma 2$ , $\alpha 3\beta 3\gamma 2$ and $\alpha 5\beta 3\gamma 2$ Subtypes**

Presented here are the complete unified protein-pharmacophore models. The Milwaukee-based pharmacophore has been inserted into each of the homology models for the receptor subtypes of the benzodiazepine receptor. The models show the similarities we expected. The two oxygens of serine 206 represent the hydrogen bond acceptor  $A_2$ . The hydrogen bond donor,  $H_1$ , is due to the hydroxyl group oxygens of Threonine 231 and Tyrosine 234. Threonine 193 is responsible for the  $H_2$  hydrogen bond donor as its hydroxyl group coordinates with lone pairs of ligands. The imidazole ring of histidine 102 coordinates with phenyl rings of ligands through  $\pi$ - $\pi$  stacking interactions.



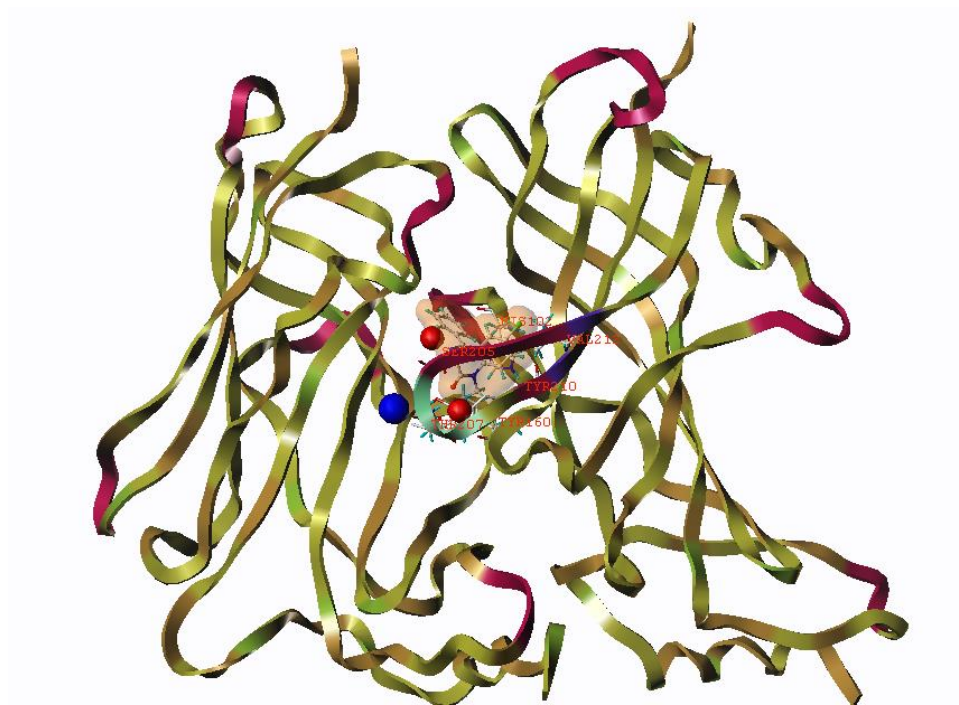

Figure 13. The  $\alpha 1\beta 3\gamma 2$  subtype receptor with key residues shown

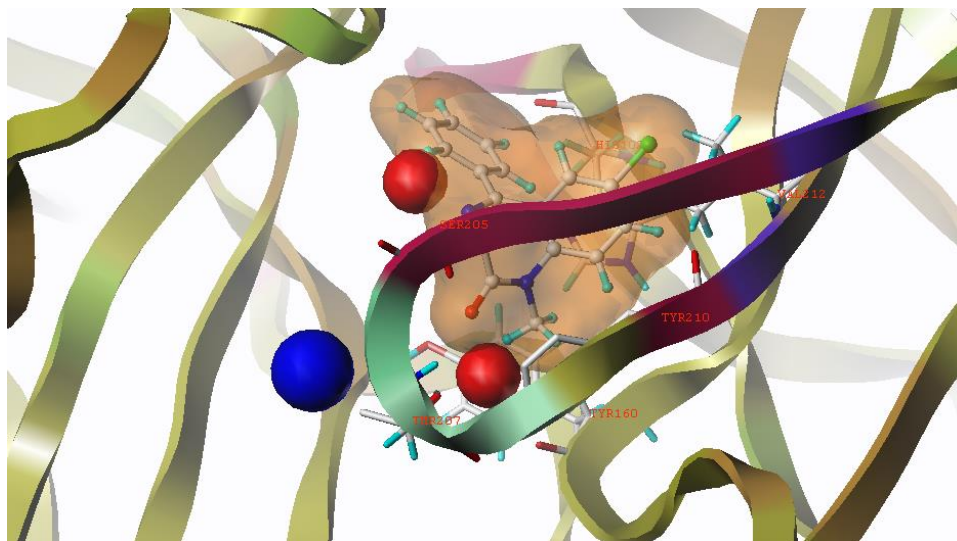

Figure 14. The benzodiazepine binding site of the  $\alpha 1\beta 3\gamma 2$  receptor

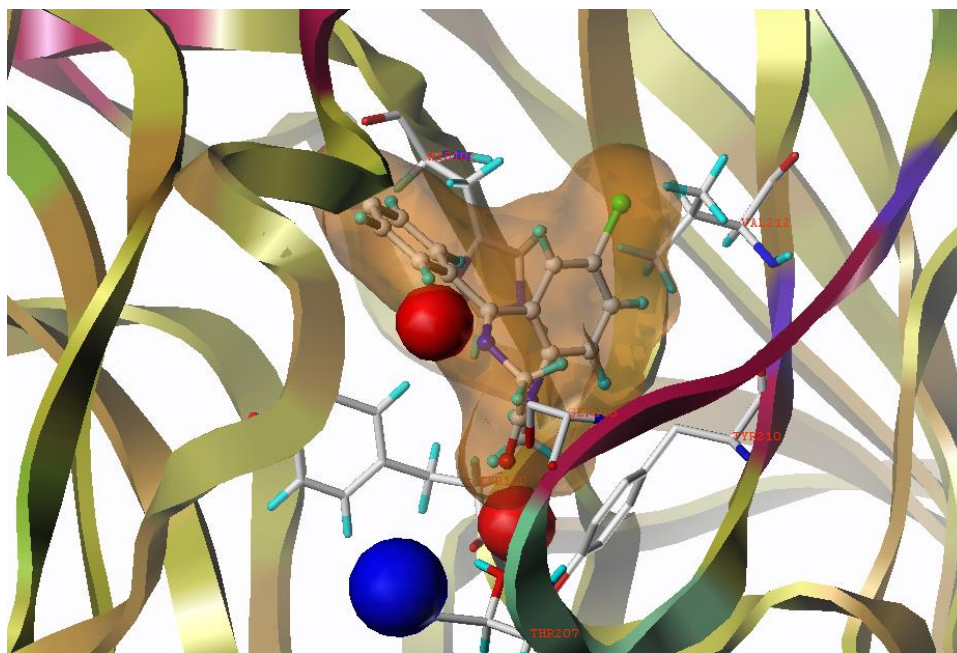

Figure 15. The benzodiazepine binding site of the  $\alpha 1\beta 3\gamma 2$  receptor rotated  $90^\circ$

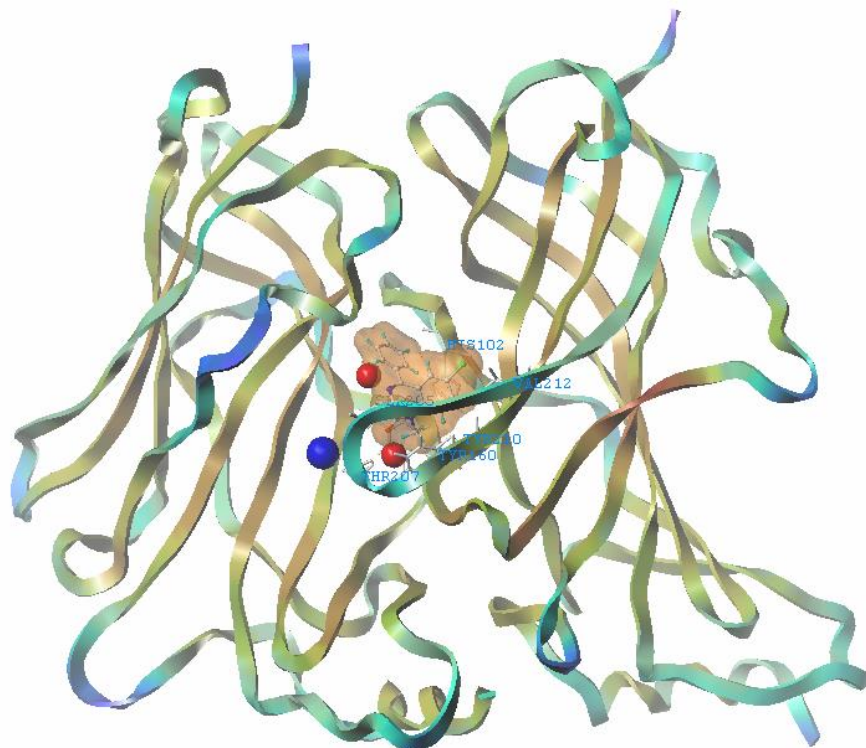

Figure 16. The  $\alpha 2\beta 3\gamma 2$  subtype receptor with key residues shown

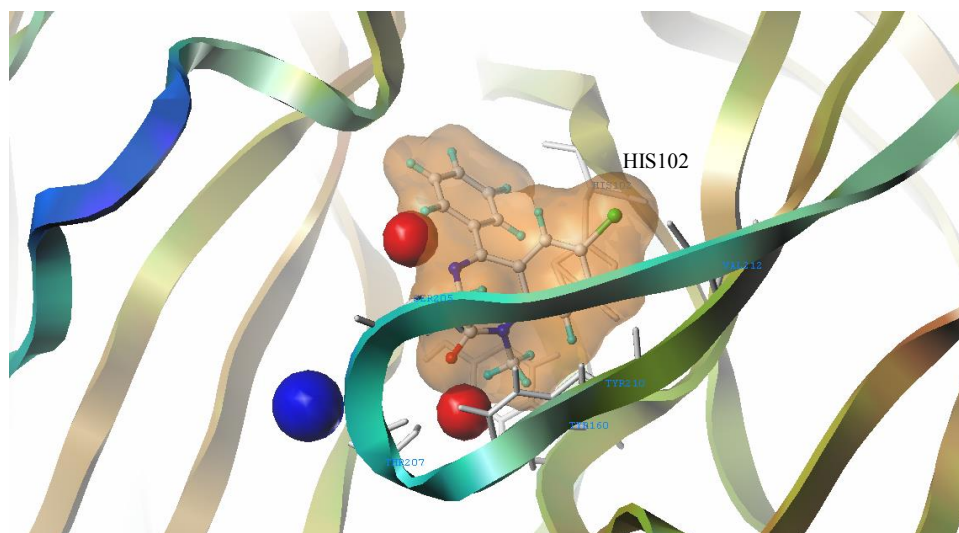

Figure 17. The benzodiazepine binding site of the  $\alpha_2\beta_3\gamma_2$  receptor

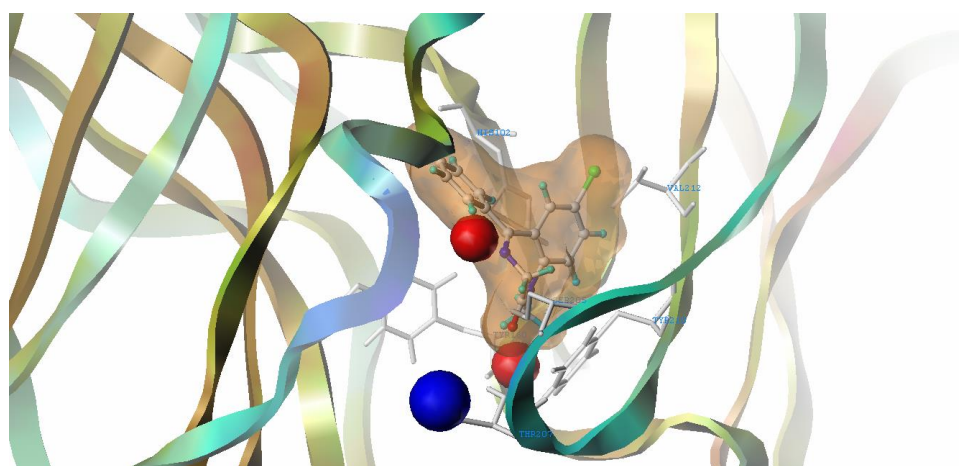

Figure 18. The benzodiazepine binding site of the  $\alpha_2\beta_3\gamma_2$  receptor rotated 90°



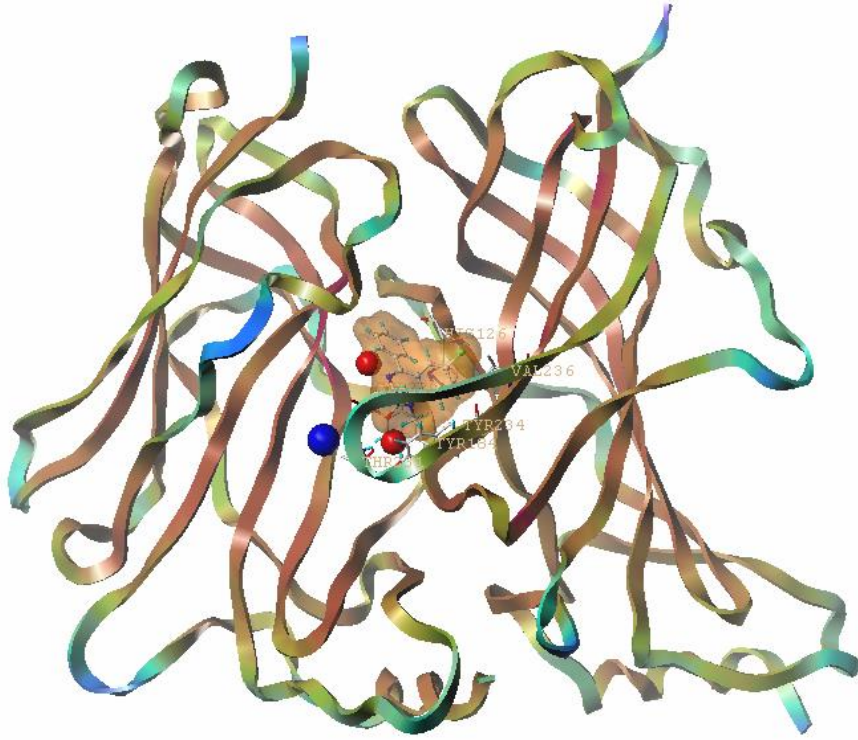

Figure 19. The  $\alpha 3\beta 3\gamma 2$  subtype receptor with key residues shown

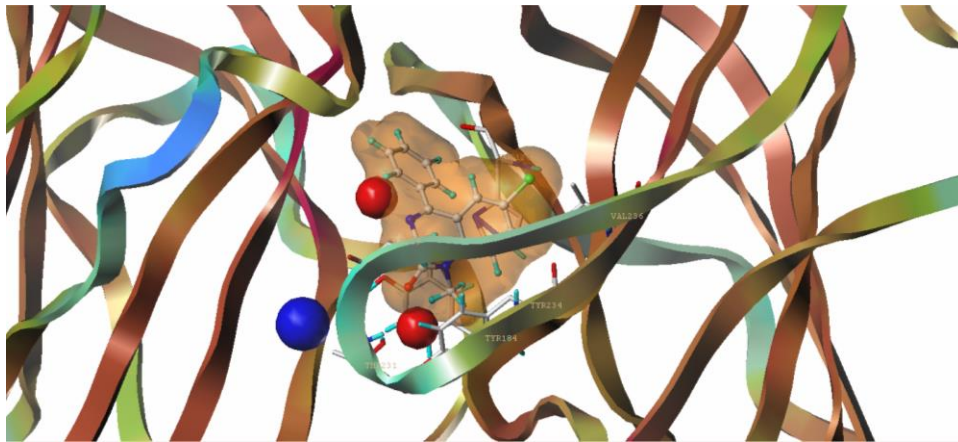

Figure 20. The benzodiazepine binding site of the  $\alpha 3\beta 3\gamma 2$  receptor within the active site

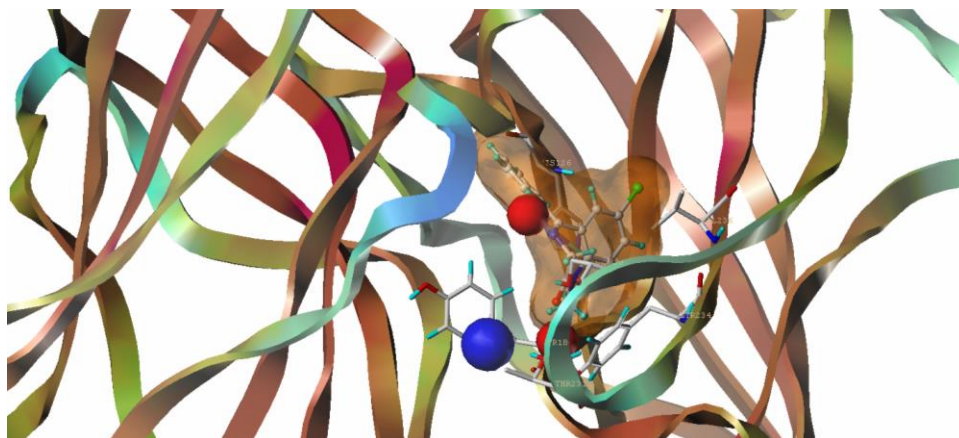

Figure 21. The benzodiazepine binding site of the  $\alpha 3\beta 3\gamma 2$  receptor rotated  $90^\circ$

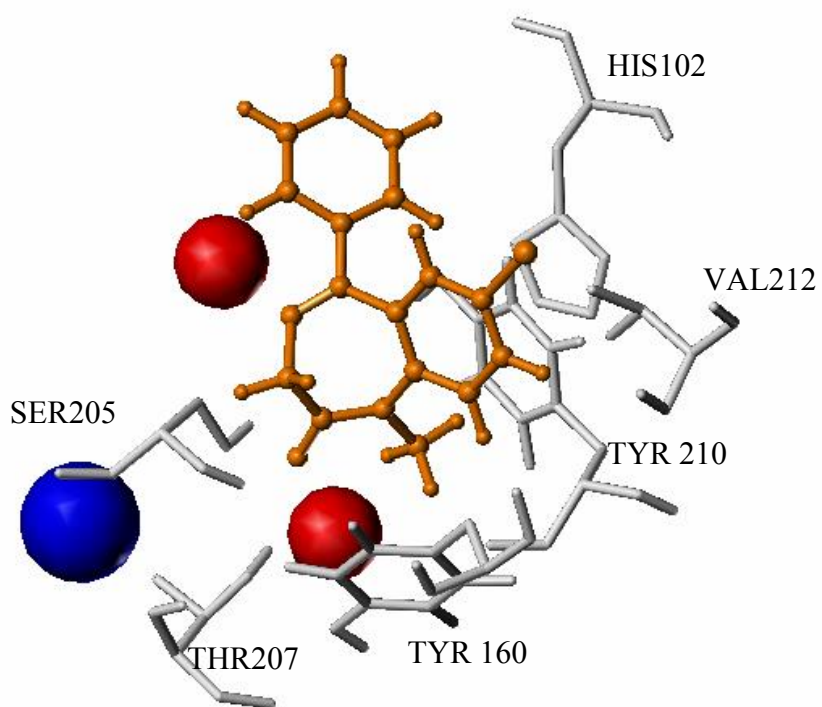

Figure 22. The benzodiazepine binding site of the  $\alpha 1\beta 3\gamma 2$  receptor with diazepam in the binding pocket.



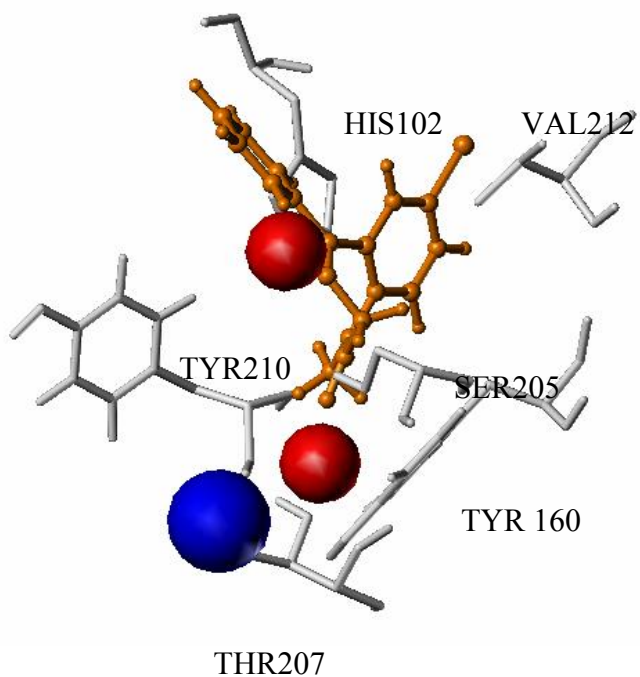

Figure 23. The benzodiazepine binding site of the  $\alpha 1\beta 3\gamma 2$  receptor rotated  $90^\circ$  with diazepam in the binding site

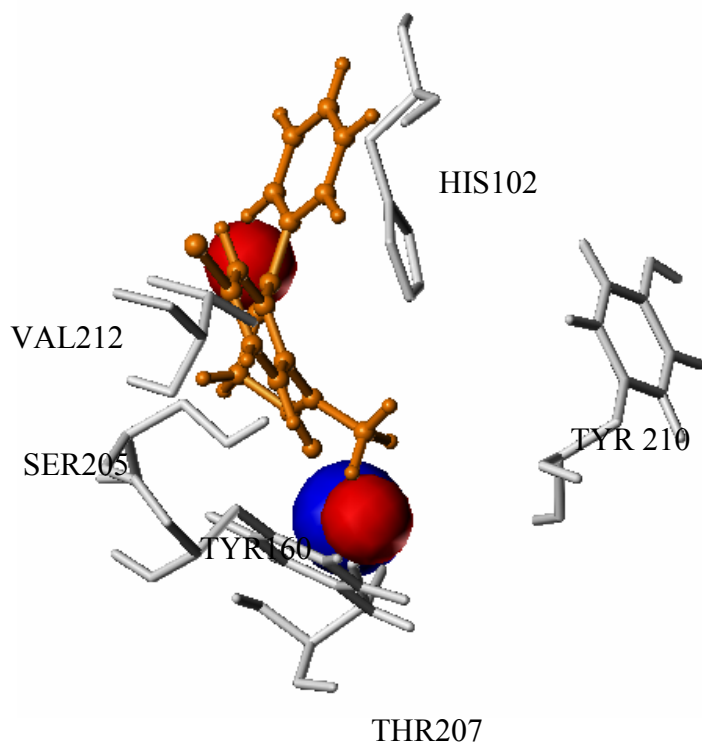

Figure 24. The benzodiazepine binding site of the  $\alpha 1\beta 3\gamma 2$  receptor rotated  $90^\circ$  (reverse direction) with diazepam in the binding site

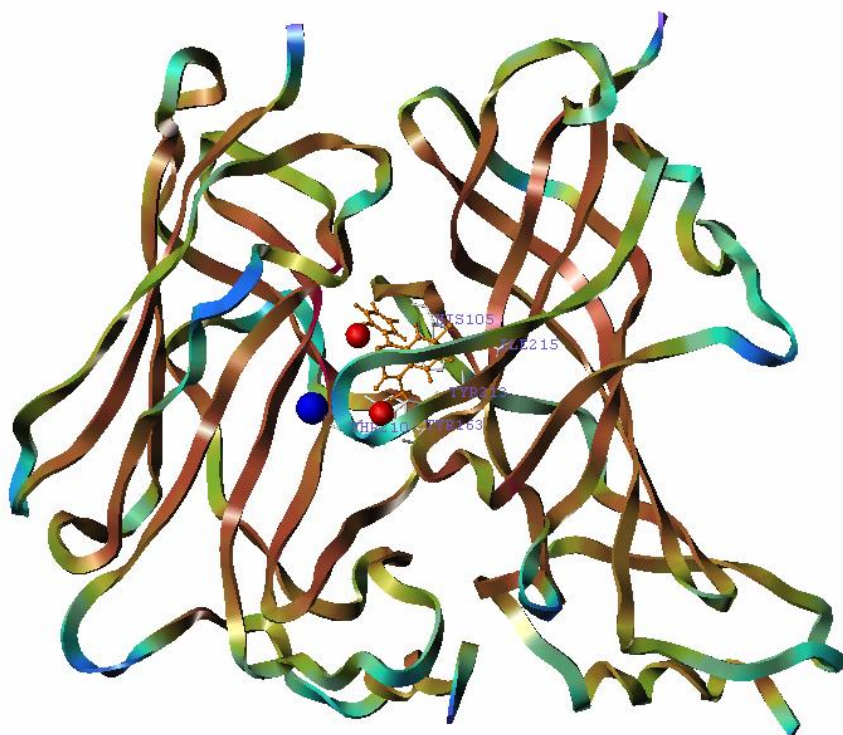

Figure 25. The  $\alpha 5\beta 3\gamma 2$  subtype receptor with key residues shown with diazepam in the binding site

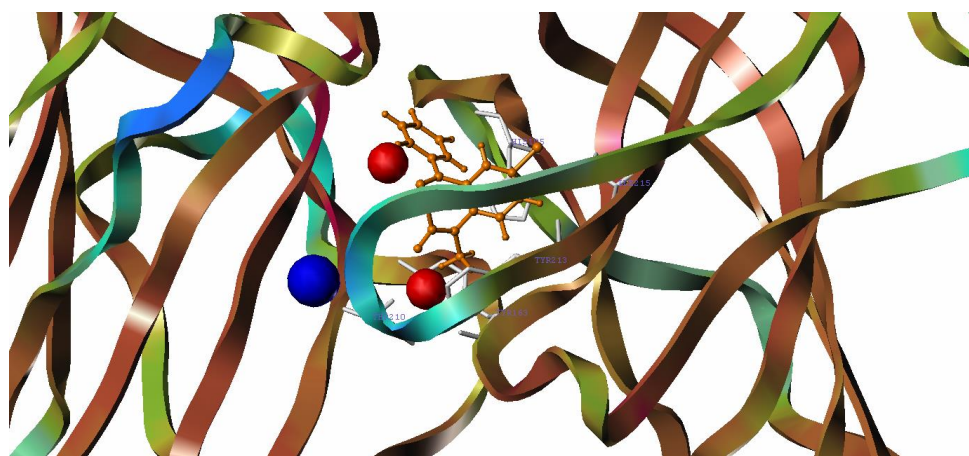

Figure 26. The benzodiazepine binding site of the  $\alpha 5\beta 3\gamma 2$  receptor with diazepam in the binding site

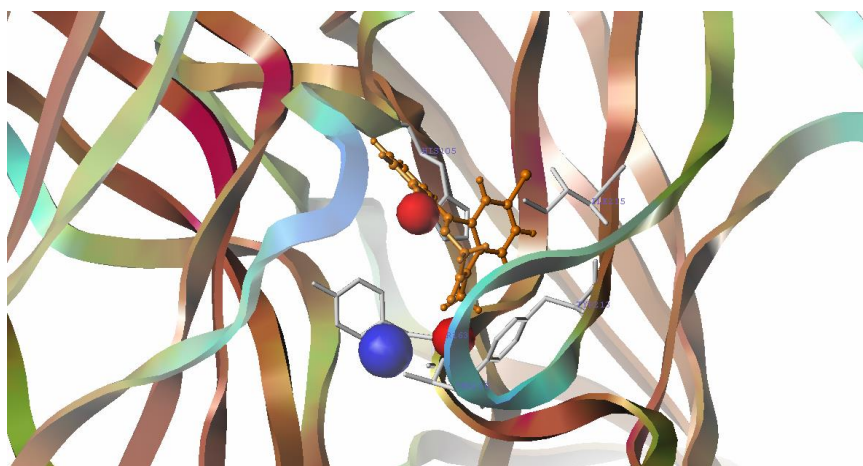

Figure 27. The benzodiazepine binding site of the  $\alpha 5\beta 3\gamma 2$  receptor rotated 90° with diazepam in the binding site

From this unified model which was constructed on binding data from hundreds of compounds, included volume analysis, site directed mutagenesis, manual as well as Sybyl Flexidock and AutoDock algorithms, one can now see how any compound will dock in the benzodiazepine binding site of GABA(A). Presented below is a compound for further research on drug abuse, WYS8.

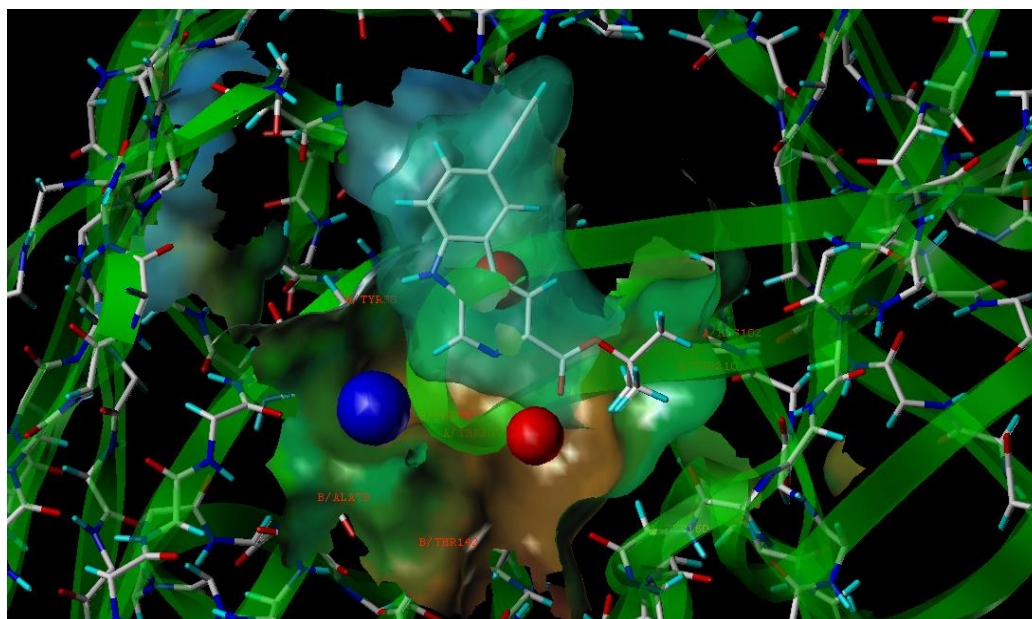

Figure 28. Flexidock fit of WYS8

Refinement of WYS8 in the unified pharmacophore receptor was completed using FlexiDock. The protein with the pharmacophore set inside the benzodiazepine receptor is displayed with a ligand docked to the pharmacophore. From the compute function, Flexidock is executed. The pocket needs to be defined for Sybyl if it has not already. Pick atoms which are located near the binding site. All atoms within 4 Angstroms will be automatically selected by Sybyl to assist. For Flexidock to work with rigid proteins the following steps must be taken:

1. Water must be removed
2. Select atoms around the binding pocket
3. Add hydrogens
4. Pick 4Å radius to display around binding pocket
5. Have Sybyl add charges if necessary
6. Set rotatable bonds

From these models, the individual pharmacophores, and the compound database the medicinal chemist has a powerful set of tools to determine future ligands to synthesize in order to deliver subtype selective drugs with reduced side effects. For example, knowing how to dock ligands into the pharmacophore, one can begin taking measurements of ligands and residues and analyzing interactions. In the  $\alpha_2\beta_2\gamma_2$  Bz receptor His 102 and the phenyl ring of diazepam have a  $\pi$  stacking distance of 4.1 Angstroms. Next we will discuss how one can properly dock ligands into the binding site.

## Docking Studies Using AutoDock 4.2

Docking of ligands into the new binding sites of the homology models was also executed using the suite of *Autodock Tools* developed at Scripps Institute.<sup>41, 42</sup> The general procedure entails preparing *pdb* file formats of the receptor (protein) as well as the ligand. Once these docking grids and docking parameters are set, the docking run will produce multiple potential docking reports. Prior knowledge from SAR studies and mutagenesis studies is then used to select those for a parallel run (clusters) and a final docking prediction is developed.

## Preparing the Ligand for Autodock

The ligand is loaded into Autodock as a *pdb* file. Once in *Autodock*, Gasteiger partial charges are determined along with aromatic carbons, rotatable bonds and torsional degrees of freedom. A new “*pdgqt*” file is created which has this information attached to it. Preparation of the receptor begins with loading it too as a *pdb* file into Autodock. Water molecules must be removed from the protein if present for *Autodock* processing. If any residues are flexible, these need to be identified in the receptor. Once identified, torsion angles can be assigned. Bonds in side chains can be manually or automatically selected as rotatable, unrotatable, or non-rotatable. *Autodock* needs two files when docking ligands in proteins with flexible residues, a flexible PDBQT file and a Rigid PDBQT file. Before docking can begin the receptor is checked for Gasteiger charges. A map is created which identifies possible hydrogen bonding interactions.

Next, a grid box (Figure 29) is constructed around the general vicinity of the receptor if this is known.

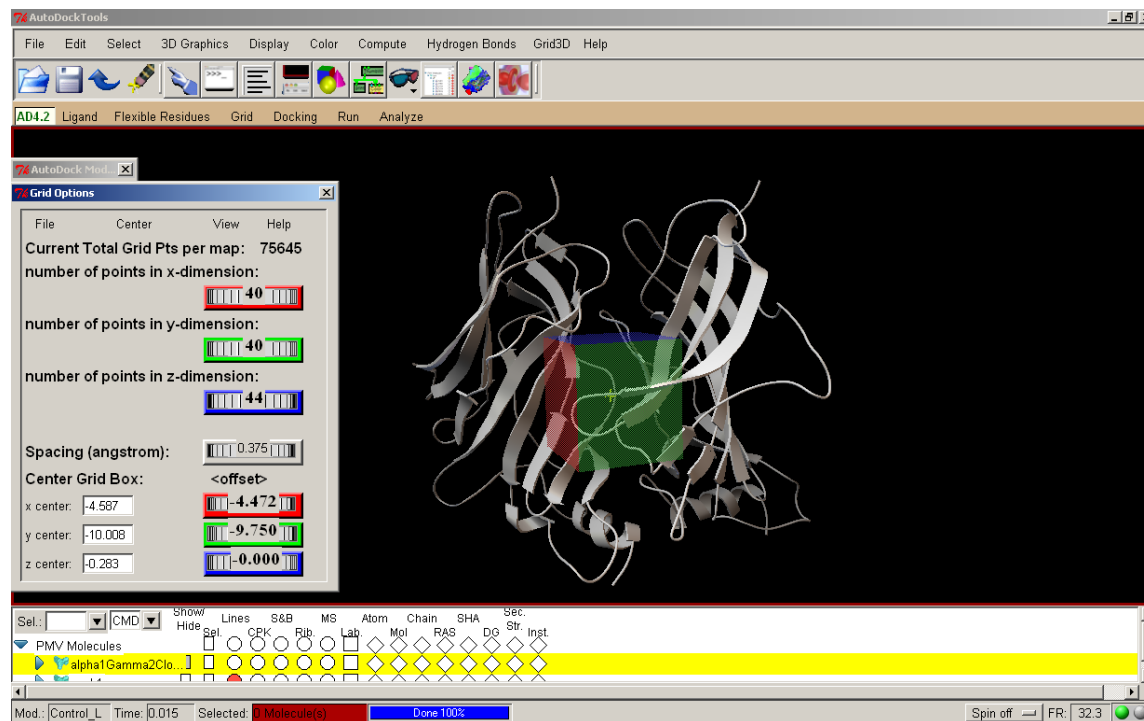

**Figure 29.** Setting the autogrid in AutoDock for the Bz BS protein

With all the appropriate information stored in a parameter file, the docking program will know which map file to use, details about the ligand rules, the potential presence of flexible residues and which docking algorithm to use. Four different docking algorithms are currently available in AutoDock. Monte Carlo simulated annealing (SA) was used. Briefly, the ligand makes random moves in the receptor and the energy of the new position is compared to the old one. Moves in which the energy is lowered are accepted.

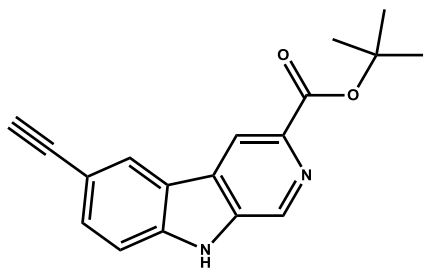

**Figure 30.** WYS8

### Docking WYS8

WYS8 was drawn in ChemDraw Ultra 8.0 (Figure 30). Lone pairs were added and the molecule was minimized in ChemDraw 3D using MM2 to a minimum RMS gradient of 0.100. This was converted to a PDB file to be loaded into AutoDock 4. Upon loading into Autodock,



Gasteiger charges were added, 14 non-polar hydrogens were merged, 10 aromatic carbons were identified, 3 rotatable bonds were detected, and TORSDOF was set to 3.

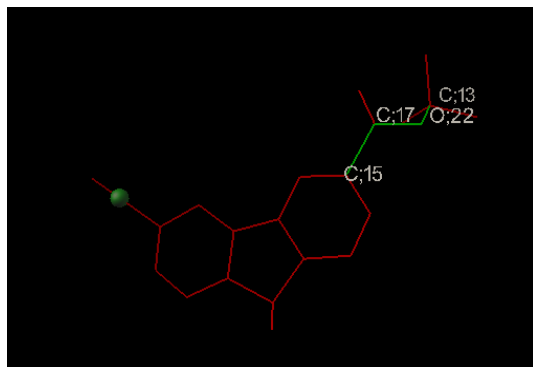

**Figure 31. Rotatable bonds are identified along with root atom in ligand WYS8**

The root atom with the smallest largest sub-tree (in this case an acetylenic hydrogen) is marked with a green sphere and the root portion (red) is identified. The rotatable bonds are colored green. The receptor was rigid for this analysis.

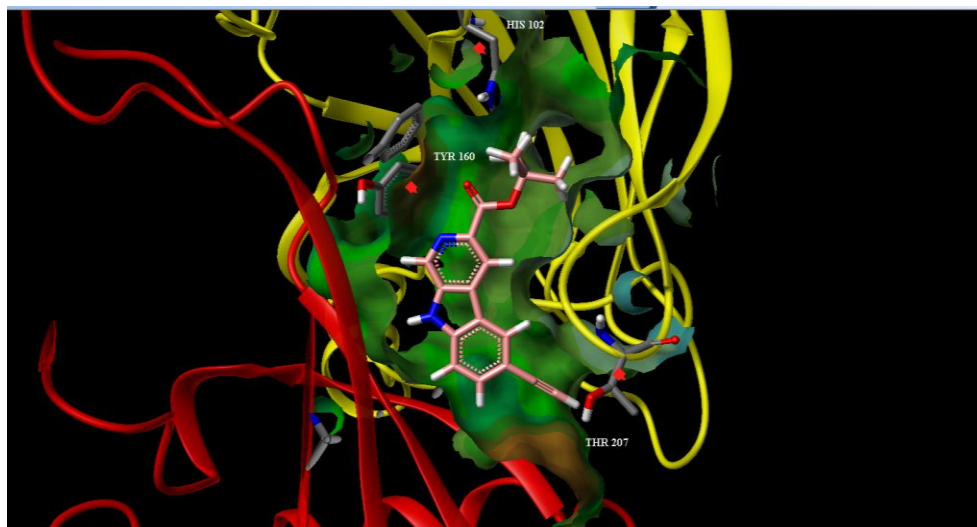

**Figure 32. AutoDock result rendering was performed using Tripos Benchware.**

Using Tripos Benchware 3D Explorer 2.6, one of the results was modeled (Figure 32). Key residues were identified and the protein surface five angstroms from the ligand was mapped showing its lipophilic potential. The results using AutoDock and a rigid protein will be much improved when flexible residues are allowed in the binding pocket along with rotatable bonds. The docking in Figure 28 is preferred when considering the orientation in the Milwaukee-based pharmacophore.

Homology models which have the pharmacophore aligned in the binding pocket have been presented for the  $\alpha 1\beta 2\gamma 2$ ,  $\alpha 2\beta 2\gamma 2$ ,  $\alpha 3\beta 2\gamma 2$ , and  $\alpha 5\beta 2\gamma 2$  GABA(A) receptors. The binding site was constructed in light of years of work including structure-activity-relationships (SAR), site directed mutagenesis, and docking studies of monomer and dimers alike. The

$\alpha 4\beta 2\gamma 2$  and  $\alpha 6\beta 2\gamma 2$  receptors have not been made as these “diazepam-insensitive” binding sites are not a focus of our research to date. An updated included volume analysis has been presented using ligands from 15 different structural families. The new included volume analyses and the unified pharmacophore protein models will continue to drive the design of novel and selective benzodiazepine receptor ligands. From these new ligands, scientists will increase their understanding of the physiological responses of the specific receptors, the design of pharmaceuticals with reduced side effects, and treatments for schizophrenia, drug addiction and Alzheimer’s disease. The  $\alpha 5\beta 2\gamma 2$  receptors are of particular interest because of their concentration in the hippocampus. The discovery of a larger  $L_3$  pocket in the  $\alpha 5\beta 2\gamma 2$  receptor versus the other subtypes will provide medicinal chemists with a structural advantage in designing more subtype selective ligands. From the unified pharmacophore protein models presented here, the design of new compounds for the GABA(A) will be more productive than ever.

### **Future Work**

Screening and modeling of more subtype selective ligands will further our current understanding of the benzodiazepine receptor and its function. Continued work on the molecular spreadsheet which will include all the compounds designed in the Milwaukee laboratory as well as other organizations will create a powerful QSAR algorithm for answering the age old question, “What compound should we make next?” This study will need to include all binding and non-binding compounds in order to create a predictive program with a high degree of accuracy ( $r^2$ ,  $q^2$ ) in predicting activity.

Site directed mutagenesis needs to be continued in which receptors of all subtypes are tested to determine how a residues substitution affects each of the subtypes. Such experimentation will shed further light on how ligands are positioned in the binding pocket and what residues they are interacting with. Adding to the new pharmacophore protein alignments which can now be executed, docking runs using *Autodock* in which the residues in the receptor are set to flexible may give further information as to docking preferences of ligands helping to better understand key interactions in each of the different subtypes.

All of these activities have allowed us to develop the current ligands as well as propose next generation ligands. The new pharmacophores will aid in furthering our understanding of GABA and in designing better drugs for the CNS until a complete GABA(A) protein receptor ion channel is captured in high resolution.

## References

1. Brejc, K.; van Dijk, W.; Klassen, R.; Schuurmans, M.; van Der Oost, J.; Smit, A. B.; Sixma, T., Crystal structure of ACh-binding protein reveals the ligand-binding domain of nicotinic receptors. *Nature* **2001**, 411, 269-276.
2. Cromer, B.; Morton, C.; Parker, M. W., Cromer's model, Anxiety of GABA(A) receptor structure relieved by AChBP. *Trends Biochem. Sci.* **2002**, 27, 280-287.
3. Grutter, T.; de Carvalho, L. P.; Dufresne, V.; Taly, A.; Fischer, M.; Changeux, J. P., A chimera encoding the fusion of an acetylcholine-binding protein to an ion channel is stabilized in a state close to the desensitized form of ligand-gated ion channels. *Comptes Rendus Biologies* **2005**, 328, (3), 223-234.
4. Trudell, J. R., Unique assignment of inter-subunit association in GABA(Alpha) alpha 1 beta 3 gamma 2 receptors determined by molecular modeling. *Biochim. Biophys. Acta* **2002**, 1565, (1), 91-96.
5. Ernst, M.; Brauchart, D.; Boresch, S.; Sieghart, W., Comparative modeling of GABA<sub>A</sub> receptors: Limits, insights, future developments. *Neuroscience* **2003**, 119, (4), 933-943.
6. Sigel, E., Mapping of the benzodiazepine recognition site on GABA<sub>A</sub> receptors. *Curr. Top. Med. Chem.* **2002**, 2, 833-840.
7. Sigel, E.; Buhr, A., The benzodiazepine binding site of GABA(A) receptors. *Trends Pharmacol. Sci.* **1997**, 18, (11), 425-429.
8. Baumann, S. W.; Baur, R.; Sigel, E., Forced subunit assembly in  $\alpha 1\beta 2\gamma 2$  GABA<sub>A</sub> receptors. *J. Biol. Chem.* **2002**, 277, (48), 46020-46025.
9. Neish, C. S.; Martin, I. L.; Davies, M.; Henderson, R. M.; Edwardson, J. M., Atomic force microscopy of ionotropic receptors bearing subunit-specific tags provides a method for determining receptor architecture. *Nanotechnol.* **2003**, 14, (8), 864-872.
10. Chou, K. C., Modelling extracellular domains of GABA-A receptors: subtypes 1, 2, 3, and 5. *Biochem. Biophys. Res. Commun.* **2004**, 316, (3), 636-642.
11. Buhr, A.; Baur, R.; Malherbe, P.; Sigel, E., Point mutations of the alpha 1 beta 2 gamma 2 gamma-aminobutyric acid(A) receptor affecting modulation of the channel by ligands of the benzodiazepine binding site. *Mol. Pharmacol.* **1996**, 49, (6), 1080-1084.
12. Sigel, E.; Baur, R.; Trube, G.; Möhler, H.; Malherbe, P., The effect of subunit composition of rat-brain GABA-A receptors on channel function. *Neuron* **1990**, 5, 703-711.
13. Sieghart, W., Structure and pharmacology of gamma-aminobutyric Acid<sub>A</sub> receptor subtypes. *Pharmacol. Rev.* **1995**, 47, (2), 181-234.

14. Khom, S.; Baburin, I.; Timin, E. N.; Hohaus, A.; Sieghart, W.; Hering, S., Pharmacological properties of GABA(A) receptors containing gamma 1 subunits. *Mol. Pharmacol.* **2006**, 69, (2), 640-649.
15. Unwin, N., Refined structure of the nicotinic acetylcholine receptor at 4A resolution. *J. Mol. Biol.* **2005**, 346, (4), 967-89.
16. Hagen, T. J. PhD Thesis. University of Wisconsin, Milwaukee, Milwaukee, 1988.
17. Trudell, M. L. PhD Thesis. University of Wisconsin - Milwaukee, Milwaukee, 1989.
18. Hansen, S. B.; Sulzenbacher, G.; Huxford, T.; Marchot, P.; Taylor, P.; Bourne, Y., Structures of Aplysia AChBP complexes with nicotinic agonists and antagonists reveal distinctive binding interfaces and conformations. *Embo J* **2005**, 24, (20), 3635-46.
19. Mihic, S. J.; Whiting, P.; Klein, R. L.; Wafford, K.; Harris, R. A., A single amino acid of the human  $\gamma$ -aminobutyric acid type A receptor  $\gamma$ 2 subunit determines benzodiazepine efficacy. *J. Biol. Chem.* **1994**, 269, 32768-32773.
20. Minier, F.; Sigel, E., Positioning of the  $\alpha$ -subunit isoforms confers a functional signature to  $\gamma$ -aminobutyric acid type A receptors. *Proc. Natl. Acad. Sci. U.S.A.* **2004**, 101, (20), 7769-7774.
21. Atack, J. R., The benzodiazepine binding site of GABA<sub>A</sub> receptors as a target for the development of novel anxiolytics. *Expert Opin. Invest. Drugs* **2005**, 14, (5), 601-618.
22. Downing, S.; Lee, Y. F.; Farb, D. H.; Gibbs, T. T., Benzodiazepine modulation of partial agonist efficacy and spontaneously active GABA<sub>A</sub> receptors supports an allosteric model of modulation. *Br. J. Pharmacol.* **2005**, 145, 894-906.
23. He, X. H.; Zhang, C. C.; Cook, J. M., Model of the BzR binding site: Correlation of data from site-directed mutagenesis and the pharmacophore/receptor model. *Med. Chem. Res.* **2001**, 10, (5), 269-308.
24. Ernst, M.; Bruckner, S.; Boesch, S.; Sieghart, W., Comparative models of GABA(A) receptor extracellular and transmembrane domains: Important insights in pharmacology and function. *Mol. Pharmacol.* **2005**, 68, (5), 1291-1300.
25. Clayton, T.; Chen, J. L.; Ernst, M.; Richter, L.; Cromer, B. A.; Morton, H. N.; Kaczorowski, C. C.; Helmstetter, F. J.; Furtmuller, R.; Ecker, G.; Parker, M. W.; Sieghart, W.; Cook, J. M., Analysis of the Benzodiazepine Binding Site on  $\gamma$ -Aminobutyric acidA Receptors: Correlation of Experimental Data with Pharmacophore and Comparative Models. *Curr. Med. Chem.* **2007**, 14, (26), 2755-2775.
26. Haefely, W., Kyburz, E., Gerecke, M., and Mohler, H. , *Recent Advances in the Molecular Pharmacology of Benzodiazepine Receptors and in the Structure-Activity Relationships of their Agonists and Antagonists*. Academic Press: New York, 1985; Vol. 99, p 165-322.

27. Kucken, A. M.; Teissere, J. A.; Seffinga-Clark, J.; Wagner, D. A.; Czajkowski, C., Structural requirements for imidazobenzodiazepines binding to GABA<sub>A</sub> receptors. *Mol. Pharmacol.* **2003**, *63*, 289-296.
28. Kucken, A. M.; Wagner, D. A.; Ward, P. R.; Teissere, J. A.; Boileau, A. J.; Czajkowski, C., Identification of benzodiazepine binding site residues in the gamma 2 subunit of the gamma-aminobutyric acid(A) receptor. *Mol. Pharmacol.* **2000**, *57*, (5), 932-939.
29. Sawyer, G. W.; Chiara, D. C.; Olsen, R. W.; Cohen, J. B., Identification of the bovine gamma-aminobutyric acid type A receptor alpha subunit residues photolabeled by the imidazobenzodiazepine [<sup>3</sup>H] Ro15-4513. *J. Biol. Chem.* **2002**, *277*, (51), 50036-50045.
30. Sancar, F.; Ericksen, S. S.; Kucken, A. M.; Teissere, J. A.; Czajkowski, C., Structural Determinants for High-Affinity Zolpidem Binding to GABA-A receptors. *Mol. Pharmacol.* **2007**, *71*, (1), 38-46.
31. Zhang, P. W.; Zhang, W. J.; Liu, R. Y.; Harris, B.; Skolnick, P.; Cook, J. M., Synthesis and SAR study of novel imidazobenzodiazepines at 'diazepam-insensitive' benzodiazepine receptors. *J. Med. Chem.* **1995**, *38*, (10), 1679-1688.
32. Zhang, W.; Diaz-Arauzo, H.; Allen, M. S.; Koehler, K. F.; Cook, J. M., *Chemical and computer assisted development of the inclusive pharmacophore of benzodiazepine receptors, in Studies in Medicinal Chemistry, M.I., Choudhary, Editor. Harwood Academic Publishers: 1996; p 303.*
33. Zhang, W.; Koehler, K. F.; Zhang, P.; Cook, J. M., Development of a comprehensive pharmacophore model for the benzodiazepine receptor. *Drug Des. Discov.* **1995**, *12*, (3), 193-248.
34. Allen, M. S.; Tan, Y. C.; Trudell, M. L.; Narayanan, K.; Schindler, L.; Martin, M. J.; Schultz, C. A.; Hagen, T. J.; Koehler, K. F.; Coddling, P.; Skolnick, P.; Cook, J., Synthetic and computer-assisted analyses of the pharmacophore for the benzodiazepine receptor inverse agonist site. *J. Med. Chem.* **1990**, *33*, 2343-2357.
35. Zhang, P. W., Synthesis of Novel Imidazobenzodiazepines as Probes of the Pharmacophore for "Diazepam-Insensitive" GABA<sub>A</sub> Receptors. *J. Med. Chem.* **1995**, *38*, 1679-1688.
36. Allen, M. S.; Laloggia, A. J.; Dorn, L. J.; Martin, M. J.; Constantino, G.; Hagen, T. J.; Koehler, K. F.; Skolnick, P.; Cook, J. M., Predictive binding of  $\beta$ -carboline inverse agonists and antagonists via the CoMFA/GOLPF approach. *J. Med. Chem.* **1992**, *35*, 4001-4010.
37. Wong, G.; Koehler, K. F.; Skolnick, P.; Gu, Z. Q.; Ananthan, S.; Schönholzer, P.; Hunkeler, W.; Zhang, W. J.; Cook, J. M., Synthetic and computer-assisted analysis of the structural requirements for selective, high-affinity ligand-binding to diazepam-insensitive benzodiazepine receptors. *J. Med. Chem.* **1993**, *36*, (13), 1820-1830.



38. Smit, A. B., A glia-derived acetylcholine-binding protein that modulates synaptic transmission. *Nature* **2001**, 411, (261-268).
39. Guex, N.; Peitsch, M. C., SWISS-MODEL and the Swiss-PdbViewer: An environment for comparative protein modeling. *Electrophoresis* **1997**, 18, 2714-2723.
40. Rost, B.; Yachdav, G.; Liu, L., The PredictProtein server. *Nucleic Acids Research* **2004**, 32 (suppl 2), W321-W326.
41. Goodsell, D. S.; Olson, A. J., Automated docking of substrates to proteins by simulated annealing. *Proteins: Structure, Function, and Genetics* **1990**, 8, 195-202.
42. Morris, G. M.; Goodsell, D. S.; Halliday, R. S.; Huey, R.; Hart, W. E.; Belew, R. K.; Olson, A. J., Automated docking using Lamarckian genetic algorithm and an empirical binding free energy function. *J. Comp. Chem* **1998**, 19, 1639-1662.

## Appendix I. Key Amino Acid Sequences

### Data Table 1. Amino acid sequence of the alpha subunit of the acetylcholine receptor in the *lymnaea stagnalis* (Great Pond Snail)

>sp|P58154|ACHP\_LYMST Acetylcholine-binding protein OS=Lymnaea stagnalis PE=1 SV=1  
MRRNIFCLACLWIVQACLSDRADILYNIRQTSRPDVIPTQRDRPVA VSVSLKFINILEV  
NEITNEVDVVFVWQQTTWSDRTLAWNSSHSPDQVSVPISSLWVPDLAAYNAISKPEVLTPO  
LARVVSDGEVLYMPSIRQRFSCDVSGVDTESGATCRIKIGSWTHHSREISVDPTTENSDD  
SEYFSQYSRFEILDVTDQKKNVSVTYSCPEAYEDVEVSLNFRKKGRSEIL

### Data Table 2. Amino acid sequence of the alpha subunit of the acetylcholine receptor in the *Torpedo californica* (Pacific Electric Ray)

>sp|P02710|ACHA\_TORCA Acetylcholine receptor subunit alpha OS=Torpedo californica GN=CHRNA1 PE=1 SV=1  
MILCSYWHVGLVLLLFSCCGLVLGSEHETRLVANLLENYNKVIRPVEHHTHFVDITVGLQ  
LIQLISVDEVNQIVETNVRLRQQWIDVRLRWNPADYGGIKKIRLPSDDVWLPDLVLYNA  
DGDFAIVHMTKLLLDYTGKIMWTPPAIFKSYCEHVTHFPDQQNCTMKLGIWTDGDKV  
SISPESDRPDLSTFMESGEVWMKDYRGWKHWVYYTCCPDTPYLDITYHFIMQRIPLYFVV  
NVIIPCLLFSFLTGLVFYLPDTSGEKMTLSISVLLSLTVFLLVIVELIPSTSSAVPLIGK  
YMLFTMIFVISSIIITVVVINTHHRSPSTHTMPQWVRKIFIDTIPNVMFFSTMKRASKEK  
QENKIFADDIDISDISGKQVTGEVIFQTPLIKNPDKSAIEGVKYIAEHMKSDEESSNAA  
EEWKYVAMVIDHILLCVFMLICIGTVSVFAGRLIELSQEG

### Data Table 3. Amino acid sequence of the alpha 1 subunit of the rat GABA(A) receptor

>sp|P62813|GBRA1\_RAT Gamma-aminobutyric acid receptor subunit alpha-1 OS=Rattus norvegicus GN=Gabra1 PE=1 SV=1  
MKKSRGLSDYLWAWTLILSTLSGRSYGQPSQDELKDNTTVFTRILDRLLDGYDNRLRPLG  
GERVTEVKTDIFVTSFGPVSDDHMEYDIDVFRQSWKDERLKFPGPMTVLRRLNNLMASKI  
WTPDTFFHNGKKSVAHNMTMPNKLRLRITEDGTLTYMRLTVRAECPMHLEDFPMDAHACP  
LKFGSYAYTRAEVVEWREPARSVVVAEDGSRLNQYDLLGQTVDSGIVQSSTGEYVVMV  
THFHLKRKIGYFVIQTYLPCIMTVILSQQVFWLNRVSPARTVFGVTTVLTMTLSISAR  
NSLPKVAYATAMDWFIACVYAFVFSALIEFATVNYFTKRGYAWDGKSVVPEKPKKVKDPL  
IKKNNTYAPTATSYTPNLARGDPGLATIAKSATIEPKVETKPPPEPKKTFNSVSKIDR  
LSRIAPELLFGIFNLVYWATYLNREPQLKAPTPHQ

### Data Table 4. Amino acid sequence of the gamma 2 subunit of the rat GABA(A) receptor

>sp|P18508|GBRG2\_RAT Gamma-aminobutyric acid receptor subunit gamma-2 OS=Rattus norvegicus GN=Gabrg2 PE=1 SV=1  
MSSPNTWSTGSTVYSPVFSQKMTLWILLLLSLYPGFTSQKSDDDYEDYASNKTWVLT PKV  
PEGDVTVILNNLLEGYDNKLRPDIGVKPTLIHTDMYVNSIGPVNAINMEYDIDIFFAQTW  
YDRRLKFNSTIKVLRNLNSNMVGKIWIPDTEFRNSKKADAHWITTPNRMLRIWNDGRVLYT  
LRLTIDAECQLQLHNFPMDEHSCPLEFSSYGPREEIVYQWKRSSVEVGDTRSWRLYQFS  
FVGLRNTTEVVKTTSGDYVVMVSVYFDLSRRMGYFTIQTYIPCTLIVVLSWVSWFWINKDAV  
PARTSLGITTTLTMTTLSTIARKSLPKVSYVTAMDLFVSVCFIVFVSALVEYGTLYHYFVS  
NRKPSKDKDKKKKNPAPTIDIRPRSA TIQMNNATHLQERDEEYGYECLDGKDCASFFCCF  
EDCRTGAWRHGRIHIRIAKMDSYARIFPTAFCLFNLVYVWSYLYL

**Data Table 5. Amino acid sequence of the alpha 1 subunit of the human GABA(A) receptor**

>sp|P14867|GBRA1\_HUMAN Gamma-aminobutyric acid receptor subunit alpha-1 OS=Homo sapiens GN=GABRA1 PE=1 SV=3  
MRKSPGLSDCLWAWILLSTLTGRSYGQPSLQDELKDNTTVFTRILDRLLDGYDNRLRPG  
LGERVTEVKTDIFVTSFGPVSDHMEYTDVFFRQSWKDERLKFKGPMTVLRLNNLMASK  
IWTPDTFFHNGKKSVAHNMTMPNKLRLRITEDGTLTYMRLTVRAECPMHLEDFPMDAHAC  
PLKFGSYAYTRAEVVYEWTREPARSVVVAEDGSRLNQYDLLGQTVDSGIVQSSTGEYVVM  
TTHFHLKRKIGYFVIQTYLPCIMTVILSQVFWLNRESVPARTVFGVTTVLTMTLSISA  
RNSLPKVAYATAMDWFIACVYAFVFSALIEFATVNYFTKRGYAWDGKSVVPEKPKKVKDP  
LIKKNNTYAPTATSYPNLRAGDPGLATIAKSATIEPKVKPETKPPPEPKKTFNSVSKID  
RLSRIAFPLLFGIFNLVYWATYLNREPQLKAPTHQ

**Data Table 6. Amino acid sequence of the gamma 2 subunit of the human GABA(A) receptor**

>sp|P18507|GBRG2\_HUMAN Gamma-aminobutyric acid receptor subunit gamma-2 OS=Homo sapiens GN=GABRG2 PE=1 SV=2  
MSSPNWSTGSSVYSTPVFSQKMTVWILLLLSLYPGFTSQKSDDDYEDYASNKTWVLT  
VPEGDVTVILNLLLEGYDNKLRPDIGVKPTLIHTDMYVNSIGPVNAINMEYTDIFFAQT  
WYDRRLKFNSTIKVLRNLSNMVGGKIWIPTFFRNSKKADAHWITTPNRMLRIWINDGRVLY  
TLRLTIDAECQLQLHNFPMDEHSCPLEFSSYGYPREEIVYQWKRSSVEVGDTRSWRLYQF  
SFVGLRNTTEVVKTTSGDYVMSVYFDLSRRMGYFTIQTYIPCTLIVVLSWVSWINKDA  
VPARTSLGITTTLTMTLSTIARKSLPKVSYVTAMDLFVSVCFIFVFSALVEYGTLYHYFV  
SNRKPSKDKDKKKKNPAPTIDIRPRSATIQMNNATHLQERDEEYGYECLDGKDCASFFCC  
FEDCRTGAWRHGRIHIRIAKMDSYARIFFPTAFCLFNLVYWVSYLYL

**Data Table 7. Amino acid sequence of the Beta 2 Subunit of the Human GABA(A) Receptor**

>sp|P47870|GBRB2\_HUMAN Gamma-aminobutyric acid receptor subunit beta-2 OS=Homo sapiens GN=GABRB2 PE=1 SV=1  
MWRVRKRGYFGIWSFPLIIAAVCAQSVNDPSNMSLVKETVDRLLKGYDIRLRPDFGGPPV  
AVGMNIDIASIDMVSEVNMDYTLTMYFQQA WRDKRLSYNVIPLNLTLDNRVADQLWV PDT  
YFLNDKKS FVHGVTVKNRMIRLHPDGT VLYGLRITTTAACMMDLRRYPLDEQNCTLEIES  
YGYTTDDIEFYWRGDDNAVTVTKIELPQFSIVDYKLITKKVVFSTGSYPRLSLSFKLKR  
NIGYFILQTYMPSILITLSWVSWINYDASAARVALGITT VLTMTTINTHLRETLPKIP  
YVKAIDMYLMGCFVVFMALLEYALVNYIFFGRGPQRQKKA AEKAASANNEKMRLDVNKM  
DPHENILLSTLEIKNEMATSEAVMGLGDP RSTMLAYDASSIQYRKA GLPRHSFGRNALER  
HVAQKKSRLRRRASQLKITIPDLTDVNAIDRWSRIFFPVVFSFFNIVYWLYYVN

**Appendix II.**

**Data Table 8. Coordinates of the Pharmacophore**

REMARK File generated by Swiss-PdbViewer 4.00b0  
REMARK <http://www.expasy.org/spdbv/>  
HETATM 1 \* hip 0 2.246 2.113 1.413 0.00100.00  
HETATM 2 O hip 0 -5.691 -0.267 -4.151 0.00100.00  
HETATM 3 H1 hip 0 0.742 3.154 -3.474 0.00100.00  
HETATM 4 H2 hip 0 -2.472 -1.062 0.681 0.00100.00  
SPDBVT 1.0000000000 0.0000000000 0.0000000000  
SPDBVT 0.0000000000 1.0000000000 0.0000000000  
SPDBVT 0.0000000000 0.0000000000 1.0000000000  
SPDBVT 0.0000000000 0.0000000000 0.0000000000  
SPDBVT 0.0000000000 0.0000000000 0.0000000000  
SPDBVV default;  
SPDBVV 15.426431672954 1678.699418606842 20.000000000000  
SPDBVV 0.4758893755 0.5102135228 -0.7163877885  
SPDBVV 0.3084772896 0.6659613576 0.6792181034

SPDBVV 0.8236328455 -0.5442220423 0.1595346499  
SPDBVV -1.7224999666 1.0460000038 -1.3689999580  
SPDBVV 0.0000000000 0.0000000000 0.0000000000  
SPDBVf 27  
SPDBVI 1.00 1.00 1.00  
SPDBVb 0.00 0.00 0.20  
SPDBVg 64  
SPDBVi 1 1 1 0 1 1 1 1 0 1 0 0 1 0 0  
SPDBVp 0  
END

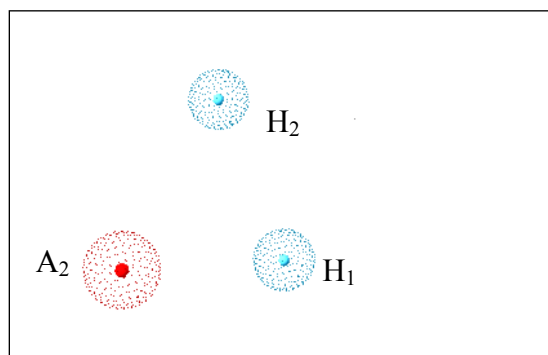

### **Appendix III.**

Structures of compounds, as reported in Clayton.<sup>21</sup>



| STRUCTURE                                                                                                                                                   | COOK CODE       | a1    | a2    | a3    | a4 | a5    | a6    |
|-------------------------------------------------------------------------------------------------------------------------------------------------------------|-----------------|-------|-------|-------|----|-------|-------|
| 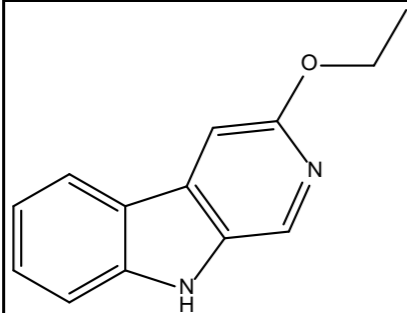<br><chem>CCOC1=CN=C2C=CC=CC12</chem><br>$C_{13}H_{12}N_2O$                | 3 EBC           | 6.43  | 25.1  | 28.2  |    | 826   | 1000  |
| <br><chem>CCOC1=CN=C2C=CC=CC12</chem><br>$C_{14}H_{14}N_2O$                | 3 PBC           | 5.3   | 52.3  | 68.8  |    | 591   | 1000  |
| <br><chem>CC1=CC=CC=C1COc2c3c[nH]c4ccccc34</chem><br>$C_{18}H_{14}N_2O$  | 3-BENZOXY bC    | 830   | 3000  | 3000  |    | 10000 | 10000 |
| <br><chem>CC(C)CCOC1=CN=C2C=CC=CC12</chem><br>$C_{15}H_{16}N_2O$         | 3-isobutoxy bC  | 24.9  | 123.6 | 139.2 |    | 1000  | 10000 |
| <br><chem>CC(C)CCOC1=CN=C2C=CC=CC12</chem><br>$C_{16}H_{18}N_2O$         | 3-isopentoxy bC | 350.2 | 3000  | 3000  |    | 3000  | 10000 |
| <br><chem>COC1=CN=C2C=CC=CC12</chem><br>$C_{12}H_{10}N_2O$               | 3MBC            |       |       |       |    |       |       |
| <br><chem>CCOC(=O)C1=CN=C2C=CC(=C2C1)OCCO</chem><br>$C_{18}H_{20}N_2O_4$ | 6-PBC           | 0.49  | 1.21  | 2.2   |    | 2.39  | 1343  |

|                                                                                                               |            |      |      |      |       |       |
|---------------------------------------------------------------------------------------------------------------|------------|------|------|------|-------|-------|
| 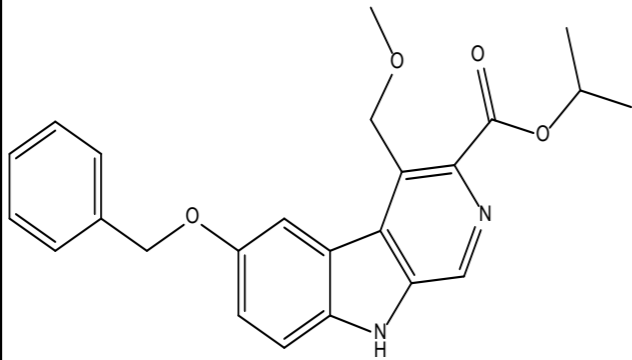<br>$C_{24}H_{24}N_2O_4$     | ABECARNIL  | 12.4 | 15.3 | 7.5  | 6     | 1000  |
| <br>$C_{17}H_{13}ClN_4$      | alprazolam | 0.8  | 0.59 | 1.43 | 1.54  | 10000 |
| <br>$C_{14}H_{12}N_2O_2$    | BCCE       | 1.2  | 4.9  | 5.7  | 26.8  | 2700  |
| <br>$C_{16}H_{16}N_2O_2$   | BCCt       | 0.72 | 15   | 18.9 | 110.8 | 5000  |
| <br>$C_{19}H_{20}BrN_3O_3$ | BRETazenil | 0.35 | 0.64 | 0.2  | 0.5   | 12.7  |
| <br>$C_{18}H_{19}ClN_2O$   | C-383      | 1000 |      | 1000 | 1000  | 1000  |
| <br>$C_{16}H_{14}ClN_3O_3$ | CD-214     | 16.4 | 48.2 | 42.5 | 9.8   | 168   |

|                                                                                                              |            |       |       |       |      |       |       |
|--------------------------------------------------------------------------------------------------------------|------------|-------|-------|-------|------|-------|-------|
| 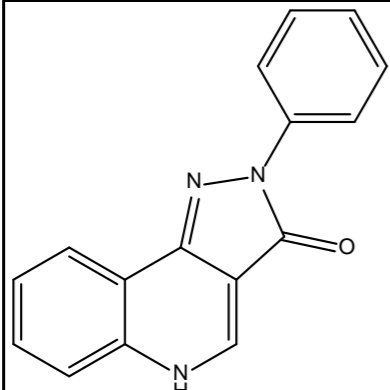<br>$C_{16}H_{11}N_3O$      | CGS8216    | 0.13  |       |       |      |       | 46    |
| <br>$C_{17}H_{13}N_3O_2$    | CGS9895    | 0.21  |       |       |      |       | 9.3   |
| <br>$C_{16}H_{10}ClN_3O$  | CGS9896    | 0.28  |       |       |      |       | 181   |
| <br>$C_{13}H_9F_3N_4$     | CL 218,872 | 57    | 1964  | 1161  |      | 561   | 10000 |
| <br>$C_{16}H_{13}IN_2O_2$ | CM-A100    | 14.49 | 44.91 | 123.8 | 1000 | 65.31 | 1000  |
| <br>$C_{16}H_{16}N_2O_2$  | CM-A49(R)  | 7.7   | 32.5  | 43    |      | 69    | 1000  |

|                                                                                                                |           |        |      |      |      |          |
|----------------------------------------------------------------------------------------------------------------|-----------|--------|------|------|------|----------|
| 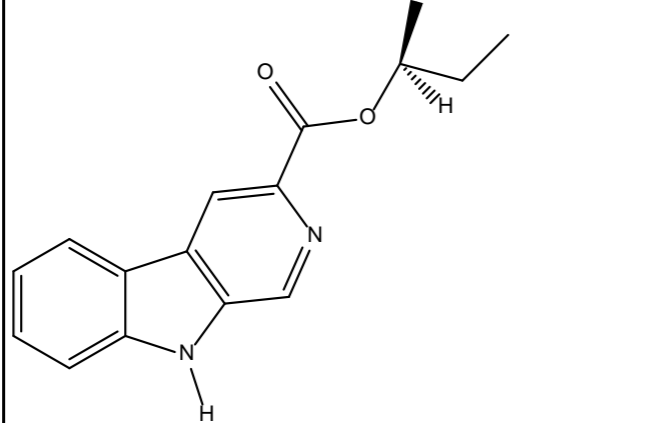<br>$C_{16}H_{16}N_2O_2$      | CM-A50(S) | 17     | 59   | 88   | 144  | 1000     |
| <br>$C_{15}H_{13}FN_2O$       | CM-A57    | 3.7    | 27   | 40   | 254  | 1000     |
| <br>$C_{15}H_{13}FN_2$      | CM-A58    | 16     | 120  | 184  | 1000 | 1012.2Nm |
| <br>$C_{16}H_{16}N_2O_2$    | CM-A64    | 18     | 60   | 116  | 216  | 1000     |
| <br>$C_{16}H_{13}F_3N_2O_2$ | CM-A69    | 1000   | 1000 | 1000 | 1000 | 1000     |
| <br>$C_{20}H_{16}N_2O_2$    | CM-A71    | 333.57 | 1000 | 1000 | 1000 | 3000     |

|                                                                                                               |            |       |       |        |       |       |       |
|---------------------------------------------------------------------------------------------------------------|------------|-------|-------|--------|-------|-------|-------|
| 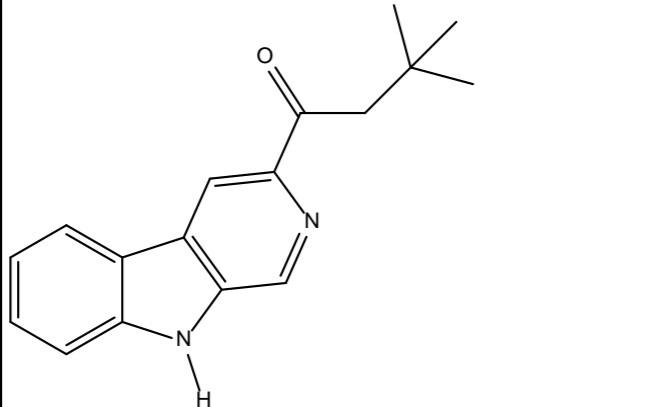<br>$C_{17}H_{18}N_2O$       | CM-A77     | 11.51 | 51.9  | 105.16 | 1000  | 42.62 | 1000  |
| <br>$C_{22}H_{30}N_2O$       | CM-A77a    | 27.4  | 111.5 | 301.3  | 1000  | 61.61 | 1000  |
| <br>$C_{20}H_{24}N_2O_2$   | CM-A82a    | 2.78  | 8.93  | 24.51  | 1000  | 7.49  | 1000  |
| <br>$C_{16}H_{15}FN_2O_2$  | CM-A87     | 1.62  | 4.54  | 14.73  | 1000  | 4.61  | 1000  |
| <br>$C_{19}H_{20}BrN_3O_3$ | CM-A95(ss) | 141.5 | 225   | 59.45  | 30.36 | 146.3 | 107.1 |
| <br>$C_{19}H_{20}BrN_3O_3$ | CM-A97(sr) | 70.81 | 89.48 | 30.64  | 40.73 | 67.01 | 38.12 |



|                                                                                                                  |             |     |     |     |      |     |      |
|------------------------------------------------------------------------------------------------------------------|-------------|-----|-----|-----|------|-----|------|
| 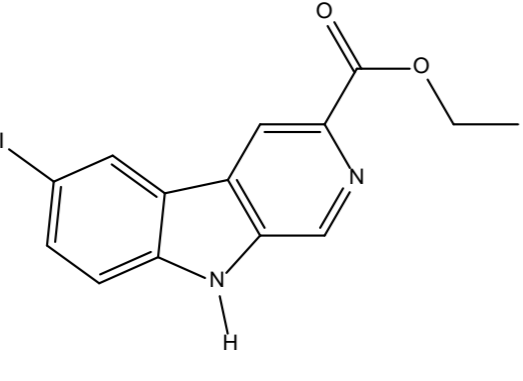<br>$C_{14}H_{11}IN_2O_2$       | CM-B01      | 4.8 | 31  | 34  | 1000 | 286 | 1000 |
| <br>$C_{19}H_{20}ClN_3O_3$     | CM-B31c(ss) | 118 | 319 | 173 | 37   | 15  | 137  |
| <br>$C_{19}H_{20}IN_3O_3$     | CM-B31i(ss) | 90  | 184 | 78  | 18   | 4.9 | 121  |
| <br>$C_{19}H_{17}BrF_3N_3O_3$ | CM-B34      | 472 | 451 | 223 | 114  | 17  | 175  |
| <br>$C_{19}H_{20}FN_3O_3$     | CM-B44(ss)  | 32  | 43  | 12  | 379  | 4.3 | 485  |
| <br>$C_{19}H_{17}ClF_3N_3O_3$ | CM-B45      | 230 | 557 | 336 | 265  | 15  | 230  |

|                                                                                                                |            |      |       |      |      |      |      |
|----------------------------------------------------------------------------------------------------------------|------------|------|-------|------|------|------|------|
| 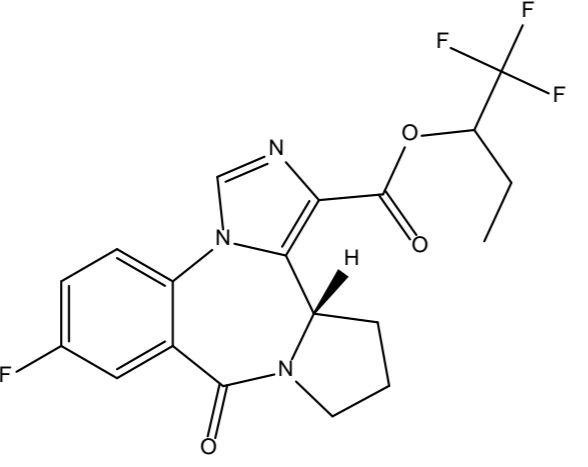<br>$C_{19}H_{17}F_4N_3O_3$   | CM-B47     | 32   | 63    | 34   | 2007 | 4.4  | 717  |
| <br>$C_{19}H_{17}BrF_3N_3O_3$ | CM-C28(SR) | 176  | 752   | 244  | 290  | 14   | 141  |
| <br>$C_{15}H_{11}F_3N_2O_2$  | CM-D30(R)  | 27   | 343.3 | 453  | 3000 | 1847 | 2000 |
| <br>$C_{15}H_{11}F_3N_2O_2$ | CM-D30(S)  | 90   | 931   | 172  | 3000 | 1000 | 3000 |
| <br>$C_{17}H_{17}N_3O_4$    | CM-D44     | 34.3 | 56.3  | 20.7 | 0.33 | 0.57 | 0.92 |
| <br>$C_{19}H_{21}N_3O_4$    | CM-D45     | 90.5 | 65.5  | 30.3 | 0.15 | 1.65 | 0.23 |
| <br>$C_{18}H_{16}F_3N_3O_4$ | CM-E09a    | 176  | 192   | 122  | 490  | 9.2  | 718  |

|                                                                                                             |          |      |     |      |     |      |     |
|-------------------------------------------------------------------------------------------------------------|----------|------|-----|------|-----|------|-----|
| 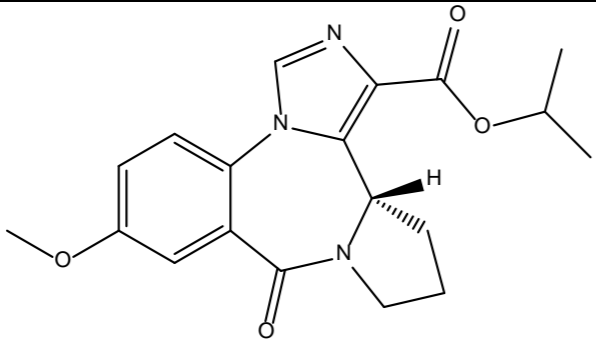<br>$C_{19}H_{21}N_3O_4$   | CM-E09b  | 20   | 22  | 19   | 55  | 0.45 | 69  |
| <br>$C_{23}H_{21}N_3O_4$   | CM-E10   | 23   | 26  | 14   | 215 | 0.51 | 96  |
| <br>$C_{20}H_{23}N_3O_4$  | CM-E11   | 333  | 308 | 161  | 394 | 14   | 750 |
| <br>$C_{16}H_{13}ClN_2O$ | diazepam | 14   | 20  | 15   |     | 11   |     |
| <br>$C_{21}H_{26}N_4O_3$ | DM-139   | 5.8  |     | 169  |     | 9.25 | 325 |
| <br>$C_{22}H_{28}N_4O_3$ | DM-146   | 6.44 |     | 148  |     | 4.23 | 247 |
| <br>$C_{19}H_{24}N_4O_3$ | DM-173   | 13.1 |     | 38.1 |     | 0.78 | 118 |

|                                                                                                                 |                           |      |      |      |      |       |      |
|-----------------------------------------------------------------------------------------------------------------|---------------------------|------|------|------|------|-------|------|
| 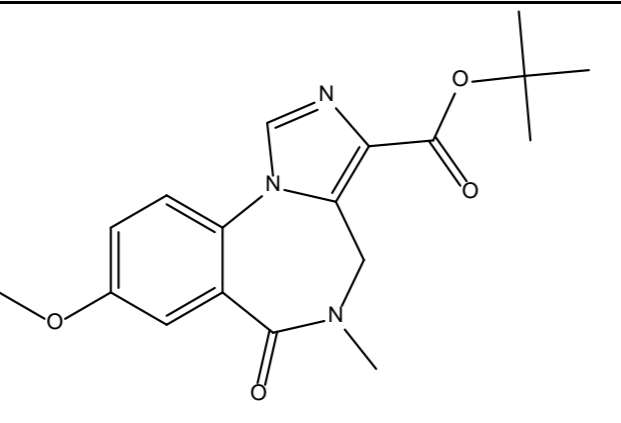<br>$C_{18}H_{21}N_3O_4$       | DM-215                    | 6.74 |      | 7.42 |      | 0.293 | 8.28 |
| <br>$C_{17}H_{19}N_3O_4$       | DM-239                    | 1.5  |      | 0.53 |      | 0.14  | 6.89 |
| <br>$C_{17}H_{18}N_2O_4$      | DMCM                      | 5.69 | 8.29 | 4    |      | 1.04  | 134  |
| <br>$C_{49}H_{46}N_6O_4Si_2$ | DMH-D-048 (C49H46N6O4Si2) | 5000 | 5000 | 5000 |      | 5000  | 5000 |
| <br>$C_{43}H_{30}N_6O_4$     | DMH-D-053 (C43H30N6O4)    | 236  | 7.4  | 272  | 5000 | 194.2 | 5000 |
| <br>$C_{39}H_{28}Br_2N_6O_4$ | DMH-D-070 (C39H28N6O4Br2) | 5000 | 1901 |      |      | 5000  | 5000 |
| <br>$C_{44}H_{32}N_6O_5$     | DMH-III-96 (C44H32N6O5)   | 460  | 5000 |      |      | 5000  | 5000 |

|                                                                                                                   |                            |      |       |       |      |       |      |
|-------------------------------------------------------------------------------------------------------------------|----------------------------|------|-------|-------|------|-------|------|
| 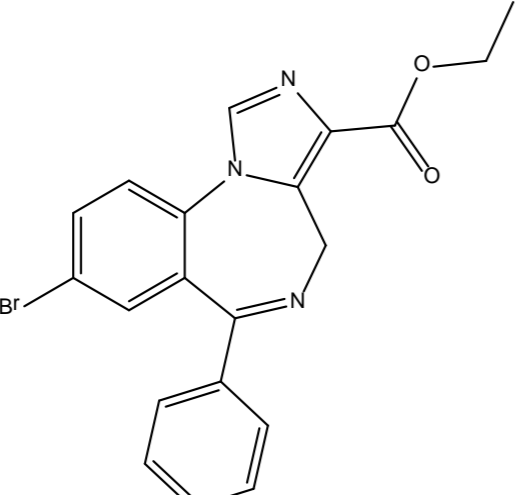<br>$C_{20}H_{16}BrN_3O_2$       | DM-I-070                   |      |       |       |      |       |      |
| <br>$C_{22}H_{21}N_3O_2$         | DM-I-81                    | 2000 | 2000  | 2000  | 2000 | 176   | 2000 |
| <br>$C_{22}H_{14}F_3N_3O_2$    | DM-II-20 (C22H14N3O2F3)    | 54.3 | 27.14 | 35.68 |      | 15.35 | 5000 |
| <br>$C_{20}H_{14}F_3N_3O_2$    | DM-II-30 C20H13N3O2BrF3    | 17.6 | 13.4  | 28.51 |      | 7.8   | 5000 |
| <br>$C_{20}H_{13}BrCl_3N_3O_2$ | DM-II-33 (C20H13N3O2BrCl3) | 88.6 | 85    | 11.6  |      | 26.2  | 5000 |
| <br>$C_{20}H_{13}Br_3N_3O_2$   | DM-II-34                   |      |       |       |      |       |      |

|                                                                                                                                |                                                                                            |       |      |      |  |      |      |
|--------------------------------------------------------------------------------------------------------------------------------|--------------------------------------------------------------------------------------------|-------|------|------|--|------|------|
| 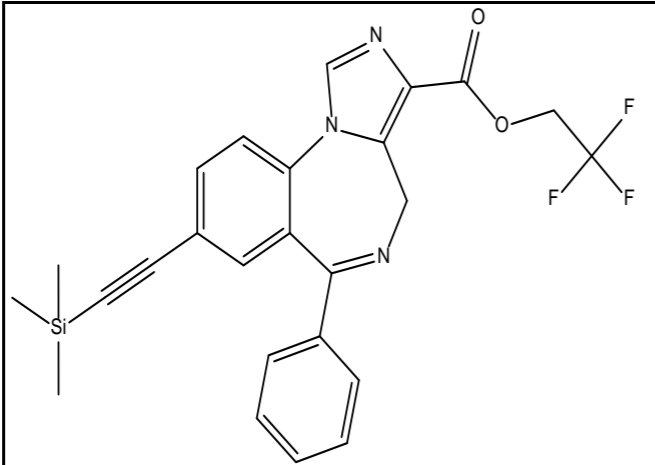 <p><math>C_{25}H_{22}F_3N_3O_2Si</math></p>  | DM-II-35 (C <sub>25</sub> H <sub>22</sub> N <sub>3</sub> O <sub>2</sub> SiF <sub>3</sub> ) | 11380 | 327  |      |  | 380  | 5000 |
|  <p><math>C_{15}H_{10}BrClN_2O</math></p>    | DM-II-72 (C <sub>15</sub> H <sub>10</sub> N <sub>2</sub> OBrCl)                            | 5000  | 1.37 |      |  | 2.02 | 5000 |
|  <p><math>C_{17}H_{12}BrClN_4</math></p>    | DM-II-90 (C <sub>17</sub> H <sub>12</sub> N <sub>4</sub> BrCl)                             | 0.505 | 1    | 0.63 |  | 0.37 | 5000 |
|  <p><math>C_{18}H_{12}BrN_3O_2</math></p>   | DM-III-01 (C <sub>18</sub> H <sub>12</sub> N <sub>3</sub> O <sub>2</sub> Br)               | 5000  | 12   |      |  | 4.73 | 5000 |
|  <p><math>C_{40}H_{30}Br_2N_6O_5</math></p> | DM-III-93 (C <sub>40</sub> H <sub>30</sub> N <sub>6</sub> O <sub>5</sub> Br <sub>2</sub> ) | 351   | 5000 |      |  | 179  | 5000 |
|  <p><math>C_{50}H_{48}N_6O_5Si_2</math></p> | DM-III-94 (C <sub>50</sub> H <sub>48</sub> N <sub>6</sub> O <sub>5</sub> Si <sub>2</sub> ) | 240   | 5000 | 5000 |  | 5000 | 5000 |



|                                                                                                             |                        |      |      |      |  |       |       |
|-------------------------------------------------------------------------------------------------------------|------------------------|------|------|------|--|-------|-------|
| 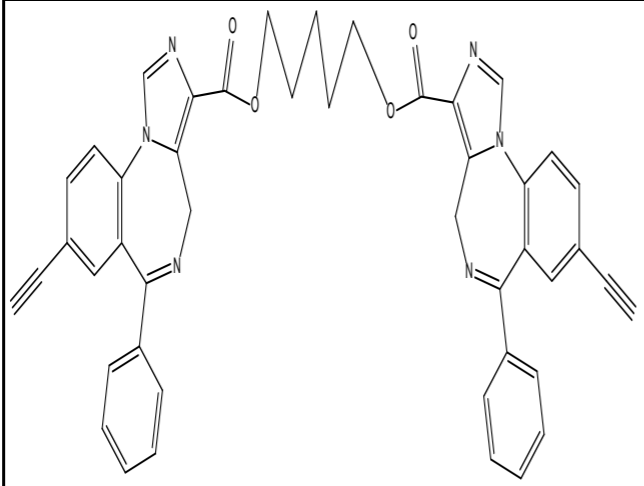<br>$C_{45}H_{34}N_6O_4$   | DM-III-97 (C45H34N6O4) | 280  | 5000 |      |  | 5000  | 5000  |
| <br>$C_{21}H_{13}N_3$     | EDC-I                  | 165  |      | 797  |  | 382.3 | 10000 |
| <br>$C_{27}H_{24}N_2O_3$ | EDC-I-042              | 183  | 20.5 | 300  |  | 270   | 10000 |
| <br>$C_{11}H_6N_4O_4$    | EDC-I-071              | 12.9 | 83.1 |      |  | 314   | 5000  |
| <br>$C_{13}H_6N_4S_2$    | EDC-I-093              | 13.6 | 423  |      |  | 2912  | 5000  |
| <br>$C_{24}H_{32}N_2O_4$ | EDC-II-012             | 1000 | 3000 | 3000 |  | 3000  | 3000  |

|                                                                                                             |            |      |       |       |       |       |
|-------------------------------------------------------------------------------------------------------------|------------|------|-------|-------|-------|-------|
| 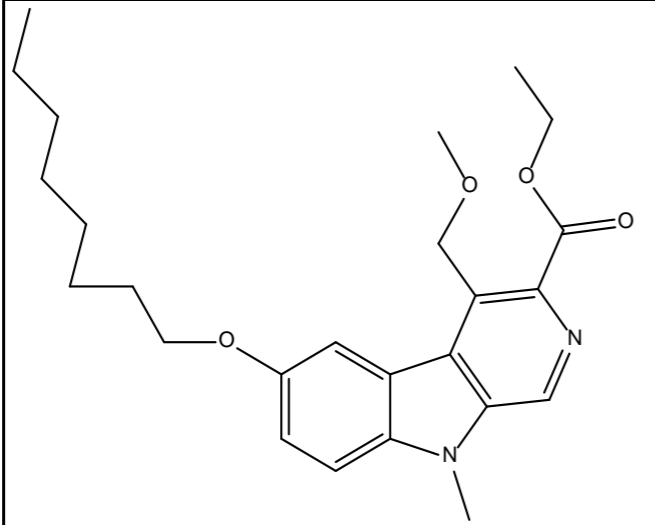<br>$C_{25}H_{34}N_2O_4$   | EDC-II-015 | 3000 | 3000  | 3000  | 3000  | 3000  |
| <br>$C_{24}H_{32}N_2O_3$  | EDC-II-024 | 3647 | 29749 | 35060 | 12683 | 30000 |
| <br>$C_{25}H_{34}N_2O_3$ | EDC-II-031 | 1000 | 1000  | 1000  | 1000  | 1000  |
| <br>$C_{27}H_{24}N_2O_4$ | EDC-II-044 | 15.4 |       | 293   | 323   | 1000  |
| <br>$C_{22}H_{15}N_5O$   | EMJ-I-025  | 288  | 474   | 316   | 86    | 5000  |

|                                                                                                                  |               |      |       |       |       |       |
|------------------------------------------------------------------------------------------------------------------|---------------|------|-------|-------|-------|-------|
| 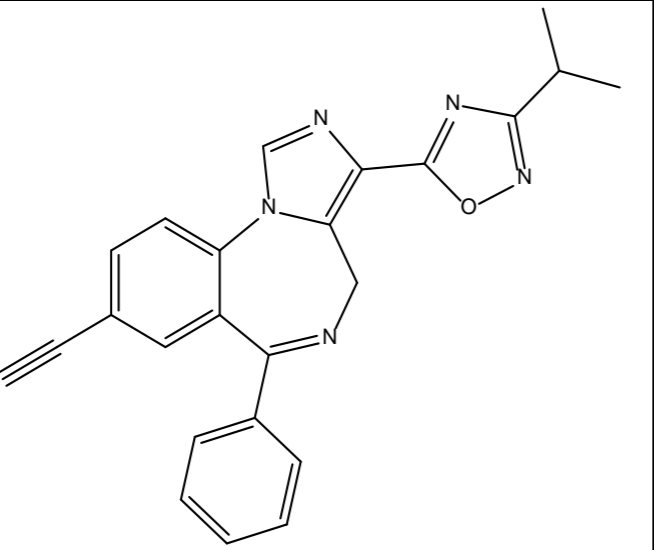<br><chem>C24H19N5O</chem>      | EMJ-I-026     | 5000 | 135   | 1027  | 152   | 5000  |
| <br><chem>C17H16ClN5O2</chem>  | FG8205        | 0.4  | 2.08  | 1.16  | 1.54  | 227   |
| <br><chem>C16H12FN3O3</chem>  | FLUNITRAZEPAM | 2.2  | 2.5   | 4.5   | 2.1   | 2000  |
| <br><chem>C21H17N3O2S</chem>  | HDA-343       | 25   | 82.6  | 58.8  | 159   | 10000 |
| <br><chem>C20H25ClN2O4</chem> | HDA-90-III    | 25.6 | 105.4 | 163.6 | 160.6 | 10000 |
| <br><chem>C16H19N3O2</chem>   | HDA-II-96     | 236  | 3000  | 3000  | 3000  | 10000 |

|                                                                                                               |                                                                       |       |       |        |  |       |      |
|---------------------------------------------------------------------------------------------------------------|-----------------------------------------------------------------------|-------|-------|--------|--|-------|------|
| 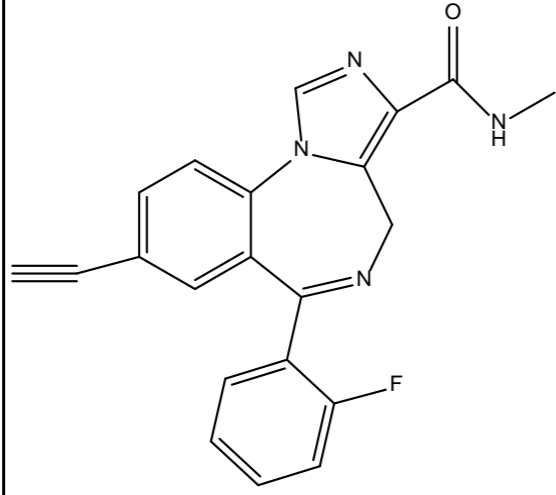<br>$C_{21}H_{15}FN_4O$      | HJ-I-037                                                              | 15.07 | 8.127 | 28.29  |  | 0.818 |      |
| <br>$C_{20}H_{15}N_5O$      | HJ-I-040                                                              | 1070  | 869.4 | 1123.6 |  | 1065  |      |
| <br>$C_{20}H_{16}ClN_3O_2$ | Hz111 C <sub>20</sub> H <sub>16</sub> N <sub>3</sub> ClO <sub>2</sub> | 46.65 | 34    | 77.6   |  | 24.6  | 842  |
| <br>$C_{20}H_{16}IN_3O_2$  | Hz120 ANX2                                                            | 5000  | 35    | 78.5   |  | 20.6  | 32.2 |
| <br>$C_{16}H_{14}BrN_3$    | Hz135 C <sub>16</sub> H <sub>14</sub> N <sub>3</sub> Br               | 94.03 | 182   |        |  | 97    | 5000 |
| <br>$C_{21}H_{23}N_3Si$    | Hz141 C <sub>21</sub> H <sub>23</sub> N <sub>3</sub> Si               | 6480  | 5000  | 5000   |  | 737   | 5000 |

|                                                                                                             |                                                          |       |      |      |  |      |      |
|-------------------------------------------------------------------------------------------------------------|----------------------------------------------------------|-------|------|------|--|------|------|
| 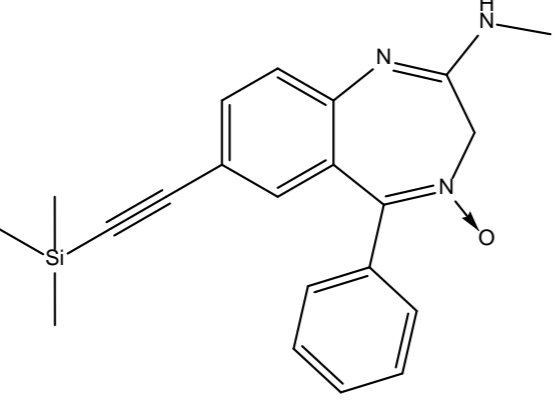<br>$C_{21}H_{23}N_3OSi$   | Hz146 C <sub>21</sub> H <sub>23</sub> N <sub>3</sub> OSi | 5000  | 5000 |      |  | 5000 | 5000 |
| <br>$C_{18}H_{15}N_3O$     | Hz147 C <sub>18</sub> H <sub>15</sub> N <sub>3</sub> O   | 5000  | 5000 |      |  | 5000 | 5000 |
| <br>$C_{18}H_{15}N_3$    | Hz148 C <sub>18</sub> H <sub>15</sub> N <sub>3</sub>     | 10.98 | 5000 |      |  | 256  | 5000 |
| <br>$C_{16}H_{14}BrN_3O$ | Hz150 C <sub>16</sub> H <sub>14</sub> N <sub>3</sub> OBr | 485   | 469  | 5000 |  | 419  | 5000 |
| <br>$C_{19}H_{19}N_3OSi$ | Hz157 C <sub>19</sub> H <sub>19</sub> N <sub>3</sub> OSi | 5000  | 5000 | 5000 |  | 5000 | 5000 |
| <br>$C_{20}H_{21}N_3OSi$ | Hz158 C <sub>20</sub> H <sub>21</sub> N <sub>3</sub> OSi | 5000  | 5000 | 5000 |  | 5000 | 5000 |

|                                                                                                                  |                    |       |       |     |      |       |      |
|------------------------------------------------------------------------------------------------------------------|--------------------|-------|-------|-----|------|-------|------|
| 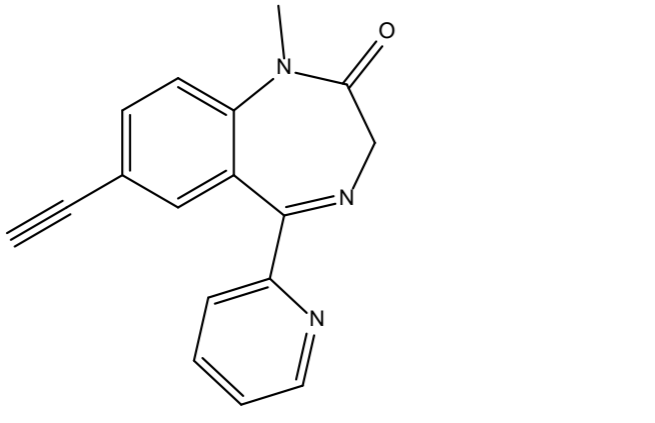<br><chem>C17H13N3O</chem>      | Hz160 C17H13N3O    | 492   | 2633  | 334 |      | 87.3  | 5000 |
| <br><chem>C19H15BrN4O2</chem>   | Hz164 C19H15N4O2Br | 99.18 | 150   | 459 |      | 108.2 | 494  |
| <br><chem>C24H24N4O2Si</chem>  | Hz165 C24H24N4O2Si | 5000  | 5000  |     |      | 5000  | 5000 |
| <br><chem>C21H16N4O2</chem>   | Hz166 C21H16N4O2   | 118   | 148   | 365 | 5000 | 76.88 | 5000 |
| <br><chem>C13H9BrN2OS</chem>  | JC184 C13H9BrN2OS  | 9.606 | 10.5  |     |      | 6.709 |      |
| <br><chem>C18H18N2OSSi</chem> | JC207 C18H18N2OSSi | 104.8 | 169.7 |     |      | 68.16 |      |
| <br><chem>C15H10N2OS</chem>   | JC208 C15H10N2OS   | 22.42 | 18.89 |     |      | 5.039 |      |



|                                                                                                               |                      |       |       |       |  |       |      |
|---------------------------------------------------------------------------------------------------------------|----------------------|-------|-------|-------|--|-------|------|
| 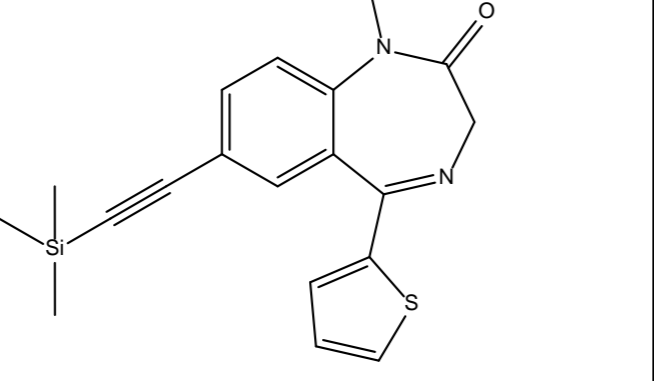<br>$C_{19}H_{20}N_2OSSi$    | JC209 C19H20N2OSSi   | 294.6 | 334.7 |       |  | 249.5 |      |
| <br>$C_{20}H_{18}N_3O_2S$   | JC221 ANX1           | 106.2 | 49.4  | 182   |  | 7.75  | 362  |
| <br>$C_{16}H_{12}N_2OS$    | JC222 C16H12N2OS     | 86.7  | 45.11 |       |  | 17.63 |      |
| <br>$C_{20}H_{15}N_3O_2S$  | JIE-I-12             | 3576  | 454.8 | 768.3 |  | 4416  |      |
| <br>$C_{19}H_{20}BrN_3O_3$ | JYI-01(C19H20N3O3Br) | 59.2  | 159   | 96    |  | 10.6  | 2.88 |
| <br>$C_{21}H_{21}N_3O_3$   | JYI-03 (C21H21N3O3)  | 185.4 | 107   |       |  | 0.954 | 3.34 |

|                                                                                                                  |                                                                                          |      |      |      |  |      |      |
|------------------------------------------------------------------------------------------------------------------|------------------------------------------------------------------------------------------|------|------|------|--|------|------|
| 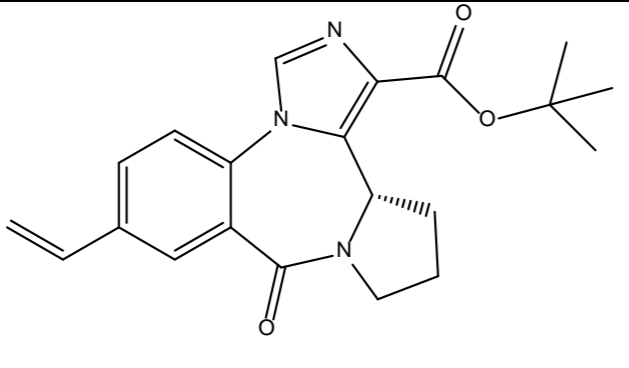<br>$C_{21}H_{23}N_3O_3$        | JYI-04 (C <sub>21</sub> H <sub>23</sub> N <sub>3</sub> O <sub>3</sub> )                  | 28.3 | 16   |      |  | 0.51 | 1.57 |
| <br>$C_{23}H_{23}N_3O_4$        | JYI-06 (C <sub>23</sub> H <sub>23</sub> N <sub>3</sub> O <sub>4</sub> )                  | 16.5 | 5.48 | 5000 |  | 12.6 | 5000 |
| <br>$C_{17}H_{13}BrF_3N_3O_3$ | JYI-10 (C <sub>17</sub> H <sub>13</sub> N <sub>3</sub> O <sub>3</sub> F <sub>3</sub> Br) | 5000 | 368  |      |  | 12.3 | 23   |
| <br>$C_{22}H_{22}F_3N_3O_3Si$ | JYI-11 (C <sub>22</sub> H <sub>22</sub> N <sub>3</sub> O <sub>3</sub> F <sub>3</sub> Si) | 5000 | 5000 |      |  | 648  | 3.97 |
| <br>$C_{19}H_{16}F_3N_3O_3$   | JYI-12 (C <sub>19</sub> H <sub>16</sub> N <sub>3</sub> O <sub>3</sub> F <sub>3</sub> )   | 91   | 39   |      |  | 4.5  | 6.8  |
| <br>$C_{21}H_{16}F_3N_3O_4$   | JYI-13 (C <sub>21</sub> H <sub>16</sub> N <sub>3</sub> O <sub>4</sub> F <sub>3</sub> )   | 5000 | 63.7 |      |  | 16   | 8.38 |
| <br>$C_{17}H_{14}F_3N_3O_3$   | JYI-14 (C <sub>17</sub> H <sub>14</sub> N <sub>3</sub> O <sub>3</sub> F <sub>3</sub> )   | 32   | 25   |      |  | 13   | 565  |

|                                                                                                                |                                                                                        |       |      |  |  |      |       |
|----------------------------------------------------------------------------------------------------------------|----------------------------------------------------------------------------------------|-------|------|--|--|------|-------|
| 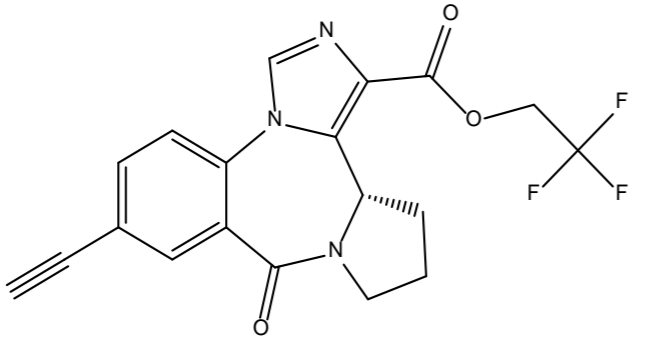<br>$C_{19}H_{14}F_3N_3O_3$   | JYI-15 (C <sub>19</sub> H <sub>14</sub> N <sub>3</sub> O <sub>3</sub> F <sub>3</sub> ) | 205   | 812  |  |  | 4.8  | 22    |
| <br>$C_{23}H_{23}N_3O_3S$     | JYI-19 (C <sub>23</sub> H <sub>23</sub> N <sub>3</sub> O <sub>3</sub> S)               | 2.2   | 205  |  |  | 34   | 12.7  |
| <br>$C_{25}H_{25}N_3O_3$     | JYI-20 (C <sub>25</sub> H <sub>25</sub> N <sub>3</sub> O <sub>3</sub> )                | 20.96 | 611  |  |  | 54   | 40.46 |
| <br>$C_{23}H_{18}F_3N_3O_3$ | JYI-21 (C <sub>23</sub> H <sub>17</sub> N <sub>3</sub> O <sub>3</sub> F <sub>3</sub> ) | 113.7 | 5000 |  |  | 209  | 60.96 |
| <br>$C_{20}H_{15}BrFN_3O_2$ | JYI-32 (C <sub>20</sub> H <sub>15</sub> N <sub>3</sub> O <sub>2</sub> BrF)             | 3.07  | 4.96 |  |  | 2.92 | 52.24 |
| <br>$C_{25}H_{24}FN_3O_2Si$ | JYI-38 (C <sub>25</sub> H <sub>24</sub> N <sub>3</sub> O <sub>2</sub> FSi)             | 5000  | 314  |  |  | 55.4 | 5000  |

|                                                                                                                  |                                                                                          |       |       |       |       |      |
|------------------------------------------------------------------------------------------------------------------|------------------------------------------------------------------------------------------|-------|-------|-------|-------|------|
| 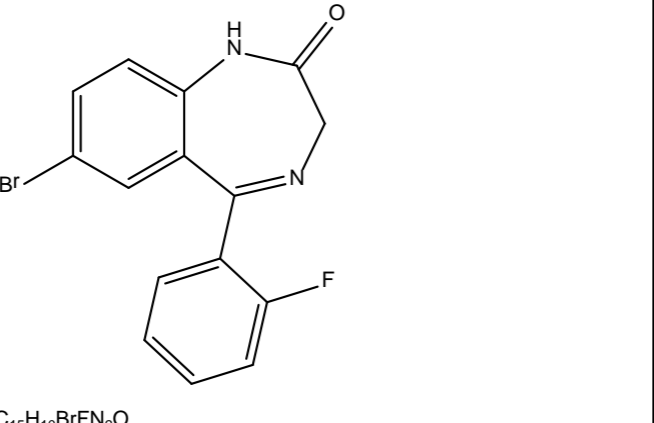<br>$C_{19}H_{10}BrFN_2O$       | JYI-42                                                                                   | 0.26  | 0.15  | 0.28  | 0.26  |      |
| <br>$C_{18}H_{11}BrFN_2O_2$    | JYI-47                                                                                   | 2.8   | 2.3   | 0.5   | 0.4   |      |
| <br>$C_{24}H_{18}FN_3O_3$     | JYI-48                                                                                   | 75.59 | 90.68 | 12.78 | 31.28 |      |
| <br>$C_{20}H_{12}BrF_4N_3O_2$ | JYI-49 (C <sub>20</sub> H <sub>12</sub> N <sub>3</sub> O <sub>2</sub> F <sub>4</sub> Br) | 1.87  | 2.38  |       | 6.7   | 3390 |
| <br>$C_{24}H_{18}FN_3O_2S$    | JYI-50 (C <sub>24</sub> H <sub>18</sub> N <sub>3</sub> O <sub>2</sub> SF)                | 106.4 | 200   |       | 37.6  | 5040 |

|                                                                                                                |                                                                                          |       |      |       |  |       |      |
|----------------------------------------------------------------------------------------------------------------|------------------------------------------------------------------------------------------|-------|------|-------|--|-------|------|
| 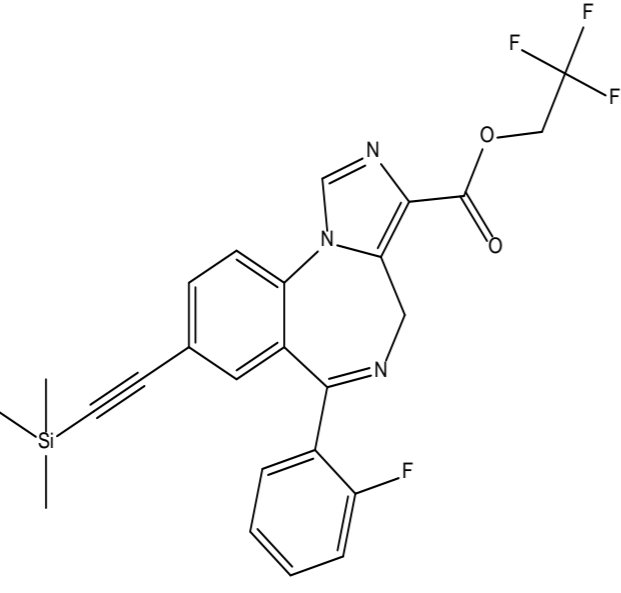<br>$C_{25}H_{21}F_4N_3O_2Si$ | JYI-53 (C <sub>23</sub> H <sub>21</sub> N <sub>3</sub> O <sub>2</sub> F <sub>4</sub> Si) | 77.4  | 40.4 | 183   |  | 133   | 3650 |
| <br>$C_{24}H_{15}F_4N_3O_3$  | JYI-54 (C <sub>24</sub> H <sub>15</sub> N <sub>3</sub> O <sub>3</sub> F <sub>4</sub> )   | 2.89  | 172  | 6.7   |  | 57    | 1890 |
| <br>$C_{20}H_{19}FN_3OSi$   | JYI-55                                                                                   | 41.39 |      | 0.504 |  | 24.75 |      |
| <br>$C_{24}H_{18}FN_3O_3$   | JYI-56 (C <sub>24</sub> H <sub>18</sub> N <sub>3</sub> O <sub>4</sub> F)                 | 95.2  | 346  | 131   |  | 34.6  | 4140 |
| <br>$C_{17}H_{12}BrFN_4$    | JYI-57                                                                                   | 0.08  | 0.08 | 0.13  |  | 0.04  |      |
| <br>$C_{22}H_{13}F_4N_3O_2$ | JYI-59 (C <sub>22</sub> H <sub>13</sub> N <sub>3</sub> O <sub>2</sub> F <sub>4</sub> )   | 1.08  | 2.6  | 11.82 |  | 11.5  | 5000 |

|                                                                                                                 |                      |      |      |      |      |       |
|-----------------------------------------------------------------------------------------------------------------|----------------------|------|------|------|------|-------|
| 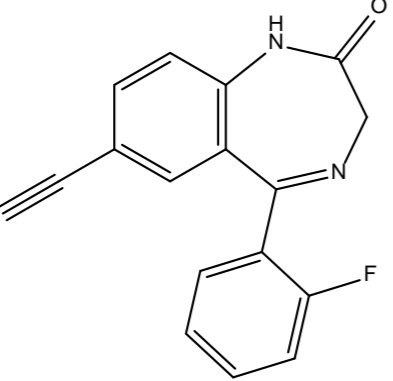<br><chem>C17H11FN2O</chem>    | JYI-60 (C17H11N2OF)  | 3.7  | 1.6  | 4.3  | 1.7  | 5000  |
| <br><chem>C17H12BrFN4</chem>   | JYI-64 (C17H12N4FBr) | 0.3  | 1.11 | 0.62 | 0.9  | 5000  |
| <br><chem>C19H13FN4</chem>    | JYI-70 (C19H13N4F)   | 6.3  | 2.1  |      | 0.56 | 5000  |
| <br><chem>C22H21FN4Si</chem> | JYI-72 (C22H21N4SiF) | 48.5 | 18.5 |      | 11.5 | 5000  |
| <br><chem>C22H16FN3O2</chem> | JY-XHE-053           | 22   | 12.3 | 34.9 | 0.7  |       |
| <br><chem>C22H19N3O2</chem>  | LD-9                 | 156  |      |      | 3000 | 10000 |



|                                                                                                                  |                  |      |       |      |      |       |       |
|------------------------------------------------------------------------------------------------------------------|------------------|------|-------|------|------|-------|-------|
| 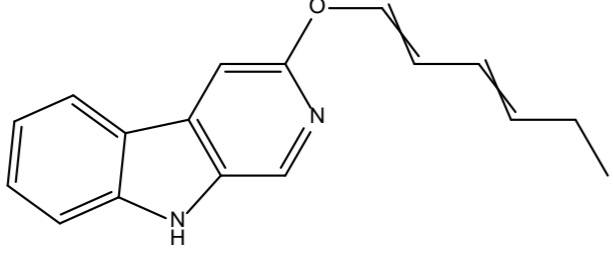<br><chem>C17H16N2O</chem>      | LJD-I-0036A      | 245  | 818   | 869  |      | 10000 | 10000 |
| <br><chem>C16H9ClN4</chem>      | LJD-II-87        | 3000 | 3000  | 3000 |      | 10000 | 10000 |
| <br><chem>C16H10N4</chem>     | LJD-III-15E      | 1.93 | 14    | 19   |      | 70.8  | 1000  |
| <br><chem>C16H10N4</chem>     | LJD-III-22A      | 105  | 227.5 | 284  |      | 3000  | 10000 |
| <br><chem>C14H14N2O</chem>    | MA-3-PROPOXYL    | 5.3  | 52.3  | 68.8 |      | 591   | 1000  |
| <br><chem>C13H14F3N3O2</chem> | MH-1 (Parkistan) | 3000 | 3000  | 3000 | 3000 | 3000  | 3000  |
| <br><chem>C13H13F3N2OS</chem> | MH-2 (Parkistan) | 3000 | 3000  | 3000 | 3000 | 3000  | 3000  |

|                                                                                                            |           |      |       |      |  |      |       |
|------------------------------------------------------------------------------------------------------------|-----------|------|-------|------|--|------|-------|
| 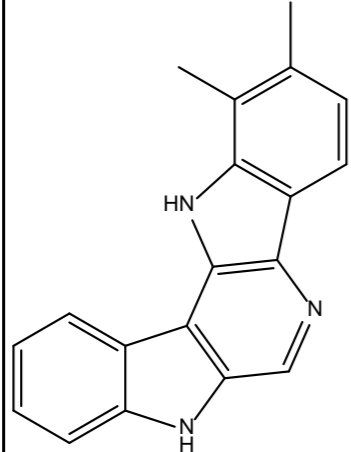<br>$C_{19}H_{15}N_3$     | MJP-II-34 | 240  |       | 391  |  | 1360 | 10000 |
| <br>$C_{17}H_{11}N_3$    | MLT-I-70  | 1.1  | 1.2   | 1.1  |  | 40.3 | 1000  |
| <br>$C_{17}H_{10}FN_3$  | MLT-II-16 | 5.05 | 10.41 | 18.4 |  | 260  | 10000 |
| <br>$C_{17}H_{10}ClN_3$ | MLT-II-18 | 3.9  | 12.2  | 24.4 |  | 210  | 10000 |
| <br>$C_{18}H_{13}N_3O$  | MLT-II-18 | 3.4  | 11.7  | 11   |  | 225  | 10000 |
| <br>$C_{17}H_{10}BrN_3$ | MLT-II-29 |      |       |      |  |      |       |

|                                                                                                                  |            |      |       |      |      |       |       |
|------------------------------------------------------------------------------------------------------------------|------------|------|-------|------|------|-------|-------|
| 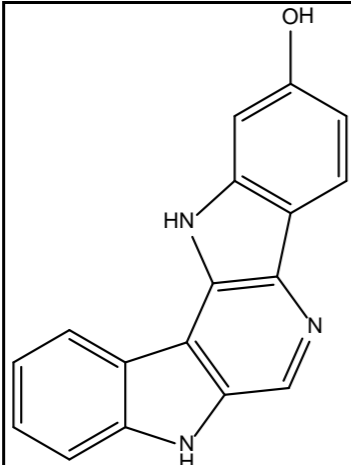<br>$C_{17}H_{11}N_3O$          | MLT-II-34  | 7.04 | 15.95 | 22.3 |      | 158   | 1000  |
| <br>$C_{24}H_{17}N_3O$         | MLT-II-87  | 432  | 3000  | 3000 |      | 10000 | 10000 |
| <br>$C_{18}H_{15}BrF_3N_3O_3$ | MMB-II-37  | 872  | 2602  | 1003 | 95   | 98    | 115   |
| <br>$C_{18}H_{15}BrF_3N_3O_3$ | MMB-II-43  | 1353 | 5173  | 1535 | 98   | 132   | 78    |
| <br>$C_{15}H_{11}F_3N_2O_2$   | MMB-II-57  | 90   | 931   | 172  | 3000 | 1000  | 3000  |
| <br>$C_{15}H_{11}F_3N_2O_2$   | MMB-II-68A | 27   | 343.3 | 453  | 3000 | 1847  | 3000  |

|                                                                                                                  |             |      |      |      |      |       |      |
|------------------------------------------------------------------------------------------------------------------|-------------|------|------|------|------|-------|------|
| 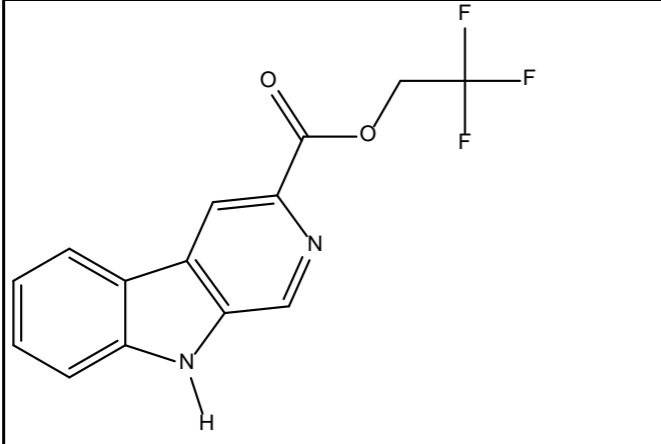<br>$C_{14}H_9F_3N_2O_2$        | MMB-II-74   | 3    | 24.5 | 41.7 | 500  | 125.7 | 1000 |
| <br>$C_{18}H_{17}BrF_3N_3O_3$   | MMB-II-87   | 200  | 333  | 107  | 109  | 5.4   | 333  |
| <br>$C_{18}H_{12}BrF_6N_3O_3$ | MMB-II-89   | 333  | 333  | 333  | 333  | 43    | 333  |
| <br>$C_{18}H_{18}BrN_3O_3$    | MMB-II-90   | 20   | 24   | 5.7  | 9    | 0.25  | 36   |
| <br>$C_{19}H_{21}N_3O_4$      | MMB-II-99   | >333 | 333  | 333  | 333  | 333   | 333  |
| <br>$C_{18}H_{19}N_3O_3$      | MMB-III-016 | 3    | 1.97 | 2    | 1074 | 0.26  | 211  |
| <br>$C_{18}H_{13}F_3N_3O_3$   | MMB-III-018 | 117  | 140  | 78   | 3500 | 14    | 976  |

|                                                                                                                                                                      |             |      |       |      |      |       |       |
|----------------------------------------------------------------------------------------------------------------------------------------------------------------------|-------------|------|-------|------|------|-------|-------|
| 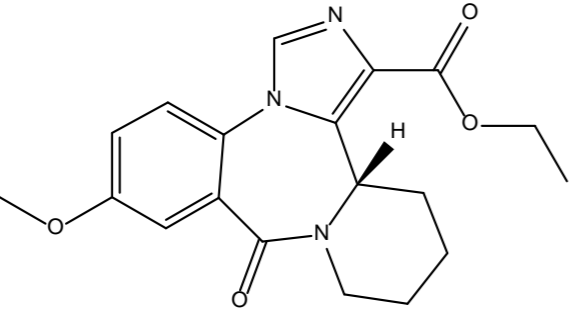<br><chem>CCOC(=O)C1=CN2C(=O)N(C1)c3ccc(OC)cc32</chem><br>$C_{19}H_{21}N_3O_4$      | MMB-III-019 | 3333 | 3333  | 3333 | 3500 | 889   | 3500  |
| <br><chem>CC(F)(F)OC(=O)C1=CN2C(=O)N(C1)c3ccccc32</chem><br>$C_{18}H_{16}F_2N_3O_3$ | MMB-III-14  | 13   | 13    | 6.9  | 333  | 1.1   | 333   |
| <br><chem>CCCOc1nc2c(c1)c3ccccc3[nH]2</chem><br>$C_{15}H_{16}N_2O$                | MSA-0-28    | 36.9 | 194   | 245  |      | 1000  | 1000  |
| <br><chem>CC(C)OCc1nc2c(c1)c3ccccc3[nH]2</chem><br>$C_{14}H_{14}N_2O$             | MSA-3-IPBC  | 283  | 3000  | 3000 |      | 10000 | 10000 |
| <br><chem>Clc1nc2c(c1)c3ccccc3[nH]2</chem><br>$C_{11}H_7ClN_2$                    | MSA-I-71    | 60.4 | 125.3 | 126  |      | 1000  | 10000 |
| <br><chem>S=C=Nc1nc2c(c1)c3ccccc3[nH]2</chem><br>$C_{12}H_7N_3S$                  | MSA-II-35   | 67.2 | 120   | 141  |      | 3000  | 10000 |
| <br><chem>CCC(=O)Nc1nc2c(c1)c3ccccc3[nH]2</chem><br>$C_{15}H_{14}N_2O$            | MSA-IV-35   | 2.1  | 16    | 21   |      | 995   | 3000  |

|                                                                                                             |           |      |       |       |       |      |
|-------------------------------------------------------------------------------------------------------------|-----------|------|-------|-------|-------|------|
| 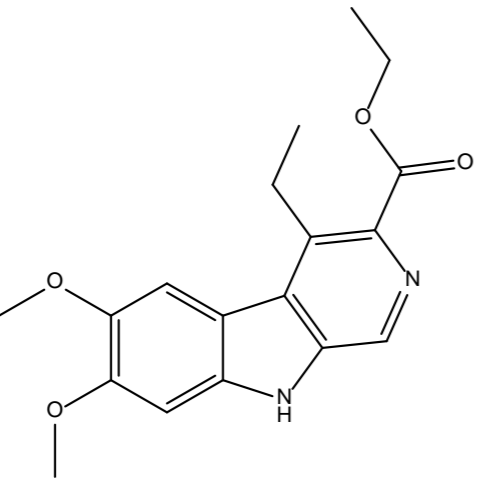<br>$C_{18}H_{20}N_2O_4$   | MSR-I-032 | 6.2  | 18.7  | 4     | 3.3   | 74.9 |
| <br>$C_{17}H_{20}N_4O_3$   | MSR-I-036 | 46   | 422   | 400   | 107.5 | 300  |
| <br>$C_{16}H_{19}N_3O_2$  | MSR-I-046 | 45   | 540   | 700   | 380   | 3000 |
| <br>$C_{16}H_{18}N_4O_3$ | MSR-I-049 | 896  | 1000  | 570   | 91.5  | 3000 |
| <br>$C_{19}H_{24}N_2O_3$ | MSR-I-056 | 24.6 | 214.4 | 270.4 | 331.9 | 1000 |
| <br>$C_{17}H_{20}N_2O_3$ | MSR-I-057 | >300 | 300   | 300   | 300   | 300  |

|                                                                                                               |           |        |     |      |      |      |      |
|---------------------------------------------------------------------------------------------------------------|-----------|--------|-----|------|------|------|------|
| 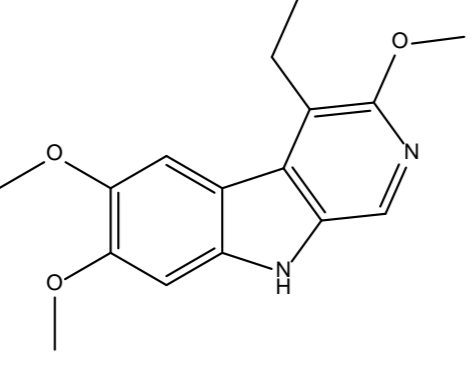<br>$C_{16}H_{18}N_2O_3$     | MSR-I-100 | 300    | 300 | 300  |      | 300  | 300  |
| <br>$C_{17}H_{17}ClN_2O$     | N-111     | 691    |     | 4209 | 3000 | 3439 | 3000 |
| <br>$C_{17}H_{18}ClN_2O$    | N-112     | 296    |     | 5260 | 3000 | 3000 | 3000 |
| <br>$C_{18}H_{19}ClN_2O_2$ | N-120     | 422    |     | 1000 | 3000 | 932  | 3000 |
| <br>$C_{17}H_{17}ClN_2O$   | N-26      | 1000   |     | 3000 | 3000 | 3000 | 3000 |
| <br>$C_{19}H_{21}ClN_2O$   | N-30      | 1491   |     | 2000 | 2000 | 2000 | 2000 |
| <br>$C_{19}H_{21}ClN_2O_2$ | N-80      | 1614.4 |     | 2000 | 2000 | 2000 | 2000 |

|                                                                                                                 |                     |       |       |       |      |       |      |
|-----------------------------------------------------------------------------------------------------------------|---------------------|-------|-------|-------|------|-------|------|
| 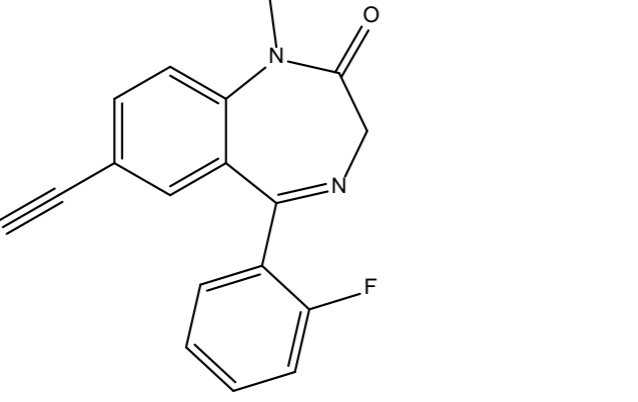<br><chem>C18H13FN2O</chem>    | OMB-18              | 3.9   | 1.2   | 3.4   | 1733 | 0.8   | 5    |
| <br><chem>C19H15FN2O</chem>    | OMB-19              | 22    | 4.6   | 20    | 3333 | 3.5   | 40   |
| <br><chem>C23H17N5O</chem>   | PS-1-26 C23H17N5O   | 933.5 | 366   | 260   |      | 393.5 | 5000 |
| <br><chem>C21H16BrN5O</chem> | PS-1-27 C21H16N5BrO | 182   | 294   |       |      | 86    | 5000 |
| <br><chem>C26H25N5OSi</chem> | PS-1-28 C26H25N5OSi | 5000  | 5000  |       |      | 5000  | 5000 |
| <br><chem>C20H17BrN4O</chem> | PS-1-34B            |       | 4.198 | 3.928 |      |       |      |



|                                                                                                             |         |       |       |       |       |      |  |
|-------------------------------------------------------------------------------------------------------------|---------|-------|-------|-------|-------|------|--|
| 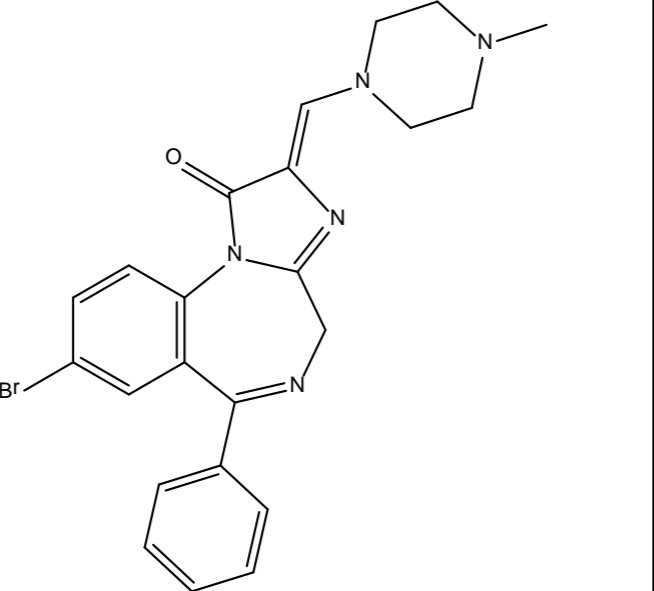<br>$C_{23}H_{22}BrN_2O$   | PS-1-35 |       | 16.03 | 24.41 |       |      |  |
| <br>$C_{28}H_{31}N_2OSi$  | PS-1-36 |       |       | 939.1 |       |      |  |
| <br>$C_{25}H_{23}N_2O$   | PS-1-37 | 193   | 35    | 435   | 22    | 5000 |  |
| <br>$C_{13}H_9BrN_2OS$   | PS-I-68 | 3134  | 481.3 | 679.5 | 101.3 |      |  |
| <br>$C_{20}H_{20}N_4SSi$ | PS-I-71 | 145.8 | 122.8 | 214.2 | 119.2 |      |  |

|                                                                                                                  |           |      |      |      |      |       |
|------------------------------------------------------------------------------------------------------------------|-----------|------|------|------|------|-------|
| 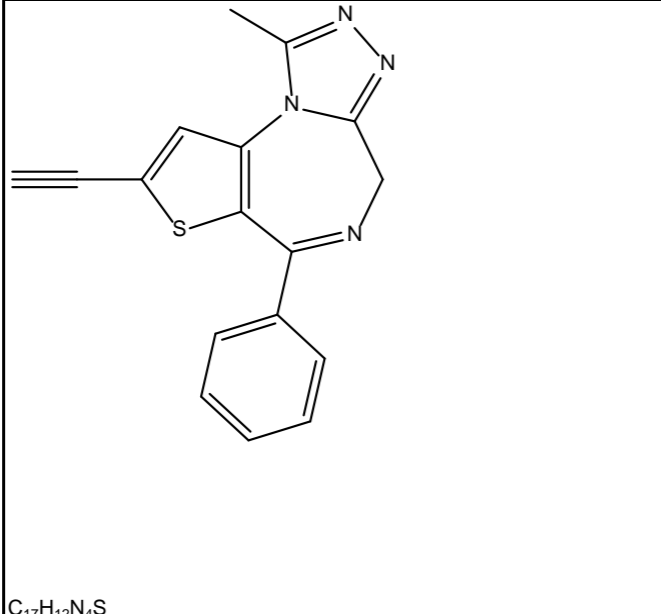<br><chem>C17H12N4S</chem>      | PS-I-72   | 123  | 31   | 386  | 34   | 5000  |
| <br><chem>C16H15N3O2</chem>    | PWIII-012 | 1000 | 1000 | 1000 | 166  | 1000  |
| <br><chem>C16H10ClN3O</chem>  | PWZ-0071  | 0.23 | 0.17 | 0.12 | 0.44 | 17.31 |
| <br><chem>C17H13N3O2</chem>   | PWZ-007A  | 0.11 | 0.1  | 0.09 | 0.2  | 10    |
| <br><chem>C17H13N3O2</chem>   | PWZ-009A1 | 1.34 | 1.31 | 1.26 | 0.84 | 2.03  |
| <br><chem>C14H14ClN3O2</chem> | PWZ-029   | 300  | 300  | 300  | 38.8 | 300   |

|                                                                                                                  |          |       |       |       |      |       |
|------------------------------------------------------------------------------------------------------------------|----------|-------|-------|-------|------|-------|
| 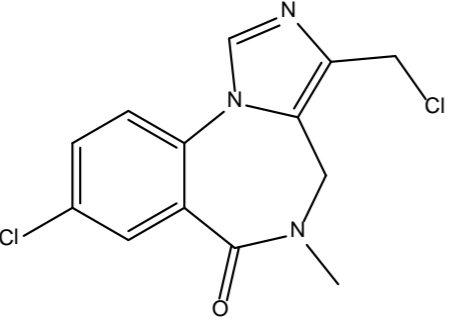<br><chem>C13H11Cl2N3O</chem>   | PWZ-031A | 300   | 300   | 300   | 28.5 | 300   |
| <br><chem>C13H12ClN3O2</chem>   | PWZ-034A | 300   | 300   | 300   | 300  | 300   |
| <br><chem>C15H16ClN3O2</chem> | PWZ-035A | 300   | 300   | 300   | 82.7 | 300   |
| <br><chem>C17H18ClN3O2</chem> | PWZ-049  | 1581  | 2865  | 2739  | 166  | 2930  |
| <br><chem>C14H12ClN3O2</chem> | PWZ-051  | 17535 | 33834 | 22125 | 2612 | 29500 |
| <br><chem>C17H21ClN4O</chem>  | PWZ-057  | 9483  | 30000 | 15409 | 2583 | 30160 |

|                                                                                                                  |          |      |       |      |      |      |
|------------------------------------------------------------------------------------------------------------------|----------|------|-------|------|------|------|
| 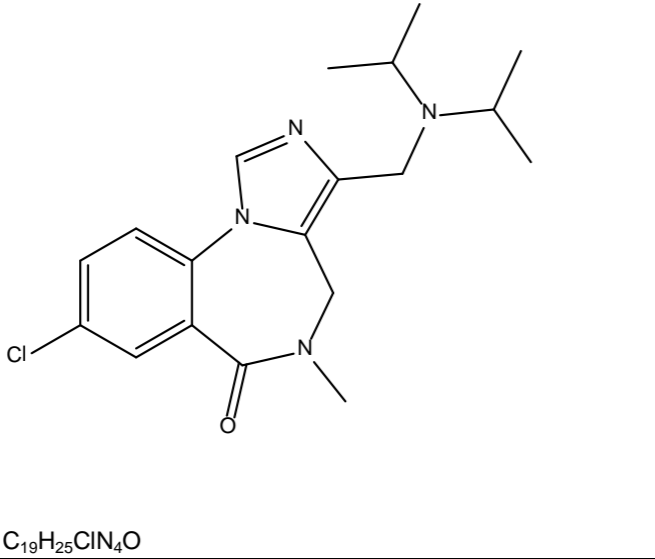<br><chem>C19H25ClN4O</chem>    | PWZ-058  | 4201 | 12590 | 6266 | 1346 | 8600 |
| <br><chem>C14H14ClN3O</chem>   | PWZ-066  | 408  | 1527  | 1125 | 182  | 3648 |
| <br><chem>C17H20ClN3O</chem>  | PWZ-068  | 2050 | 2900  | 2907 | 369  | 960  |
| <br><chem>C16H17N3O4</chem>   | PWZ-085  | 4.86 | 13    | 8.5  | 0.55 | 40   |
| <br><chem>C17H19N3O4</chem>   | PWZ-096  | 11.1 | 36    | 16.9 | 1.07 | 51.5 |
| <br><chem>C17H12ClN3O2</chem> | PZII-028 | 0.2  | 0.2   | 0.2  | 0.32 | 1.9  |

|                                                                                                             |          |      |      |      |       |     |
|-------------------------------------------------------------------------------------------------------------|----------|------|------|------|-------|-----|
| 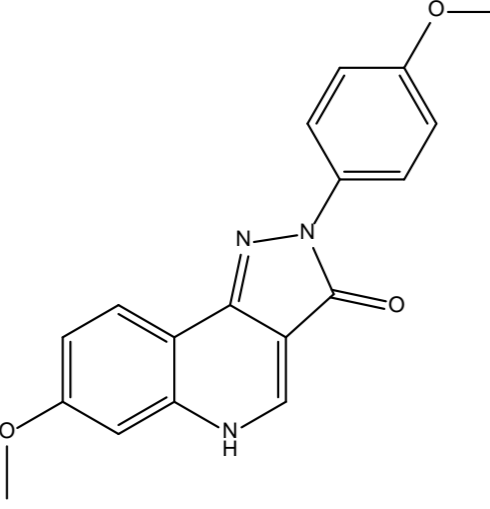<br>$C_{18}H_{18}N_2O_3$   | PZII-029 | 0.34 | 0.79 | 0.52 | 10    |     |
| <br>$C_{15}H_{10}N_6O$     | QH-133   | 2164 | 4620 | 1635 | 1000  |     |
| <br>$C_{16}H_{12}N_4O_5$  | QH-146   | 0.49 | 0.76 | 7.7  | 10000 |     |
| <br>$C_{16}H_{12}N_6O$   | QH-149   |      |      |      |       |     |
| <br>$C_{13}H_9FN_2OS$    | QH-27    | 175  | 335  | 405  | 150   | 300 |
| <br>$C_{14}H_{11}FN_2OS$ | QH-28    | 141  | 215  | 205  | 65.5  | 300 |
| <br>$C_{15}H_{10}N_4O_5$ | QH-65    |      |      |      |       |     |

|                                                                                                               |            |      |      |      |      |     |      |
|---------------------------------------------------------------------------------------------------------------|------------|------|------|------|------|-----|------|
| 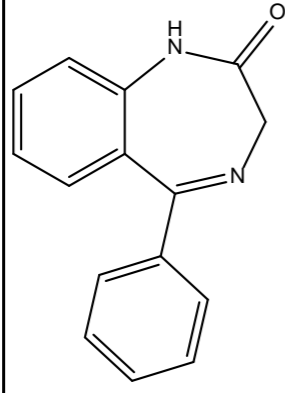<br>$C_{15}H_{12}N_2O$       | QH-II-058b | 288  | 233  | 350  |      | 140 | 3000 |
| <br>$C_{16}H_{14}N_2O$      | QH-II-059  | 81   | 138  | 318  |      | 98  | 3000 |
| <br>$C_{16}H_{13}BrN_2O$   | QH-II-063  | 9.4  | 9.3  | 31   |      | 7.7 | 3000 |
| <br>$C_{21}H_{22}N_2OSi$   | QH-II-065  | 94   | 73   | 203  |      | 63  | 3000 |
| <br>$C_{18}H_{14}N_2O$     | QH-II-066  | 76.3 | 42.1 | 47.4 | 2000 | 6.8 | 3000 |
| <br>$C_{15}H_{10}BrN_3O_3$ | QH-II-067a | 16   | 31   | 52   |      | 199 | 3000 |

|                                                                                                             |            |      |      |      |      |      |
|-------------------------------------------------------------------------------------------------------------|------------|------|------|------|------|------|
| 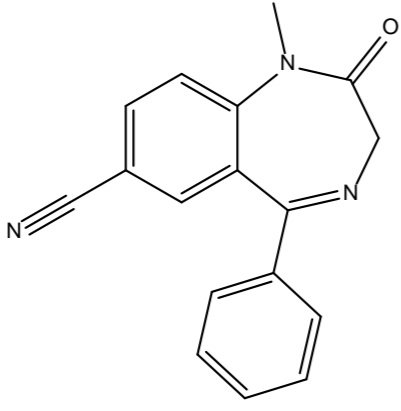<br>$C_{17}H_{13}N_3O$     | QH-II-072  | 320  | 310  | 350  | 265  | 3000 |
| <br>$C_{16}H_{10}BrN_3O$   | QH-II-075  | 0.18 | 0.21 | 0.25 | 1.3  | 40   |
| <br>$C_{16}H_{10}BrN_3O$ | QH-II-077  | 0.06 | 0.08 | 0.05 | 0.12 | 4    |
| <br>$C_{21}H_{19}N_3OSi$ | QH-II-080b | 3    | 3.7  | 4.7  | 24   | 1000 |
| <br>$C_{21}H_{19}N_3OSi$ | QH-II-082  | 1.7  | 1.8  | 1.6  | 6.1  | 100  |
| <br>$C_{18}H_{11}N_3O$   | QH-II-085  | 0.08 | 0.06 | 0.02 | 0.08 |      |

|                                                                                                             |                     |      |      |      |      |      |
|-------------------------------------------------------------------------------------------------------------|---------------------|------|------|------|------|------|
| 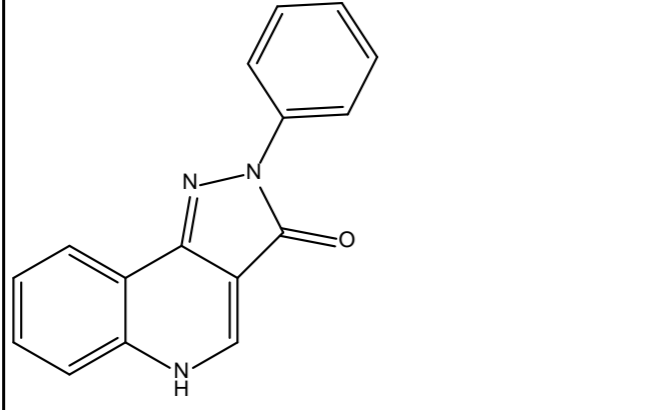<br>$C_{18}H_{11}N_3O$     | QH-II-090(CGS-8216) | 0.05 | 0.08 | 0.12 | 0.25 | 17   |
| <br>$C_{18}H_{11}N_3O$    | QH-II-092           | 0.07 | 0.03 | 0.04 | 0.17 |      |
| <br>$C_{23}H_{22}N_2OSi$ | QH-IV-014           | 3000 | 3000 | 3000 | 3000 | 3000 |
| <br>$C_{20}H_{14}N_2O$   | QH-IV-016           | 3000 | 3000 | 3000 | 3000 | 3000 |
| <br>$C_{22}H_{24}N_2OSi$ | QH-IV-019           | 3000 | 3000 | 3000 | 3000 | 3000 |
| <br>$C_{19}H_{16}N_2O$   | QH-IV-021           | 3000 | 3000 | 3000 | 3000 | 3000 |



|                                                                                                               |           |              |      |       |      |      |      |      |
|---------------------------------------------------------------------------------------------------------------|-----------|--------------|------|-------|------|------|------|------|
| 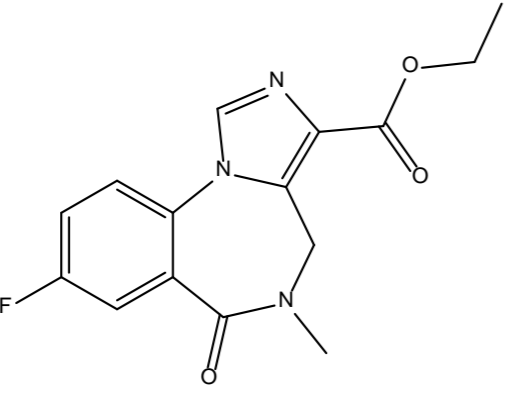<br>$C_{15}H_{14}FN_3O_3$    | Ro15-1788 | 0.8          | 0.9  | 1.05  | 0.6  | 148  |      |      |
| <br>$C_{15}H_{14}N_6O_3$     | Ro15-4513 | 3.3          | 2.6  | 2.5   | 0.26 | 3.8  |      |      |
| <br>$C_{18}H_{17}N_3O_3$   | RY-008    | 3.75         | 7.2  | 4.14  | 1.11 | 44.3 |      |      |
| <br>$C_{23}H_{29}N_3O_3Si$ | RY-020    | 275          | 387  | 337   | 23   | 301  |      |      |
| <br>$C_{22}H_{27}N_3O_3Si$ | RY-023    | C22H27N3O3Si | 197  | 142.6 | 255  | 7.8  | 2.61 | 58.6 |
| <br>$C_{19}H_{19}N_3O_3$   | RY-024    | C19H19N3O3   | 26.9 | 26.3  | 18.7 | 0.4  | 5.1  |      |

|                                                                                                               |                |      |     |      |  |      |      |
|---------------------------------------------------------------------------------------------------------------|----------------|------|-----|------|--|------|------|
| 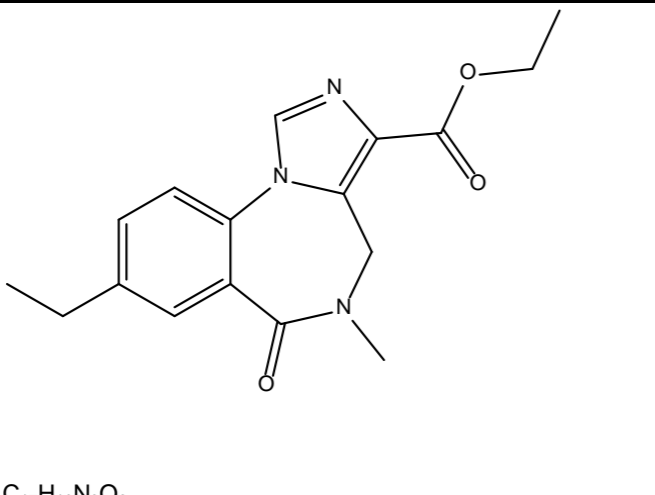<br>$C_{17}H_{19}N_3O_3$     | RY-031 (RY-10) | 20.4 | 27  | 26.1 |  | 1.5  | 176  |
| <br>$C_{18}H_{21}N_3O_3$     | RY-033         | 14.8 | 56  | 25.3 |  | 1.72 | 22.9 |
| <br>$C_{17}H_{12}N_2OS$     | RY-035         | 980  | 590 | 775  |  | 92.5 | 3000 |
| <br>$C_{18}H_{14}N_2OS$    | RY-037         | 300  | 300 | 300  |  | 300  | 300  |
| <br>$C_{22}H_{25}N_3O_3Si$ | RY-047         | 200  | 124 | 79   |  | 4    | 340  |
| <br>$C_{24}H_{17}N_3O_2$   | RY-049         |      |     |      |  |      |      |
| <br>$C_{17}H_{16}BrN_3O_3$ | RY-053         | 49   | 29  | 15   |  | 1    | 46   |

|                                                                                                               |        |      |      |      |      |      |
|---------------------------------------------------------------------------------------------------------------|--------|------|------|------|------|------|
| 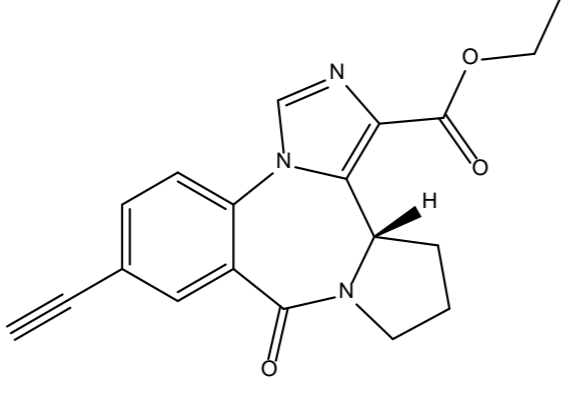<br>$C_{19}H_{17}N_3O_3$     | RY-054 | 59   | 44   | 27   | 1.3  | 126  |
| <br>$C_{21}H_{19}N_5O_2$     | RY-057 | 73   | 85   | 97   | 4.8  | 333  |
| <br>$C_{20}H_{17}N_5O_2$   | RY-058 | 86   | 40   | 85   | 2.4  | 150  |
| <br>$C_{19}H_{15}N_5O_2$   | RY-059 | 89   | 70   | 91   | 3.7  | 301  |
| <br>$C_{17}H_{12}N_2O_2$   | RY-060 | 1000 | 1000 | 1000 | 1000 | 1000 |
| <br>$C_{16}H_{14}BrN_3O_3$ | RY-061 | 17   | 13   | 6.7  | 0.3  | 31   |

|                                                                                                               |        |      |      |     |      |      |
|---------------------------------------------------------------------------------------------------------------|--------|------|------|-----|------|------|
| 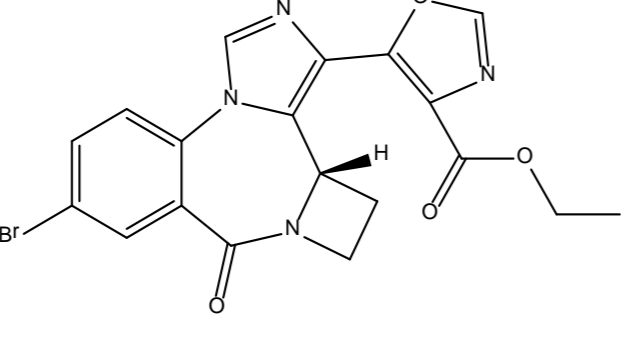<br>$C_{19}H_{15}BrN_4O_4$   | RY-062 | 1000 | 1000 | 500 | 172  | 2000 |
| <br>$C_{18}H_{14}N_2O_2$    | RY-062 | 300  | 300  | 300 | 300  | 300  |
| <br>$C_{21}H_{23}N_3O_3Si$ | RY-066 | 83   | 60   | 48  | 2.6  | 180  |
| <br>$C_{18}H_{15}N_3O_3$   | RY-067 | 21   | 12   | 10  | 0.37 | 42   |
| <br>$C_{24}H_{24}N_4O_4Si$ | RY-068 | 500  | 877  | 496 | 37   | 1000 |

|                                                                                                               |        |     |     |     |      |      |
|---------------------------------------------------------------------------------------------------------------|--------|-----|-----|-----|------|------|
| 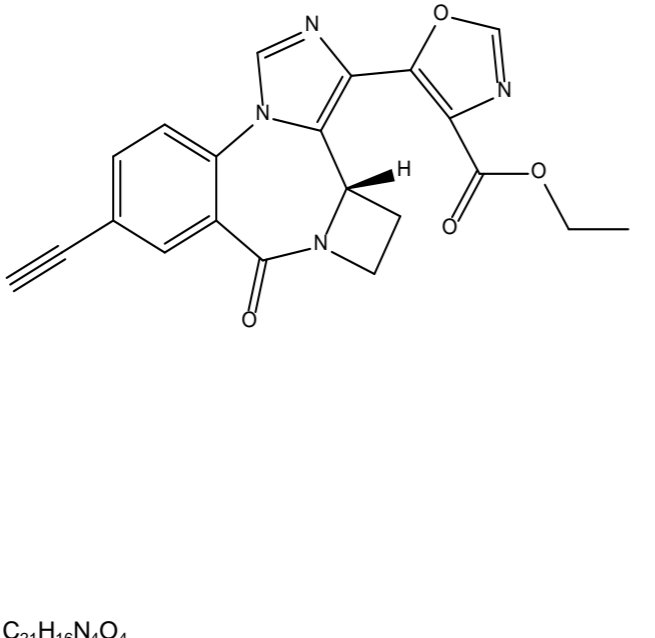<br>$C_{21}H_{16}N_4O_4$     | RY-069 | 692 | 622 | 506 | 19   | 1000 |
| <br>$C_{18}H_{13}N_5O_2$    | RY-071 | 19  | 56  | 91  | 7.2  | 266  |
| <br>$C_{19}H_{15}N_5O_2$   | RY-072 | 220 | 150 | 184 | 12.7 | 361  |
| <br>$C_{20}H_{17}N_5O_2$   | RY-073 | 156 | 88  | 122 | 8.5  | 267  |
| <br>$C_{23}H_{15}N_5O_2$   | RY-075 |     |     |     |      |      |
| <br>$C_{15}H_{14}BrN_3O_3$ | RY-076 | 26  | 27  | 13  | 0.7  | 22   |

|                                                                                                               |         |            |       |       |      |     |       |      |
|---------------------------------------------------------------------------------------------------------------|---------|------------|-------|-------|------|-----|-------|------|
| 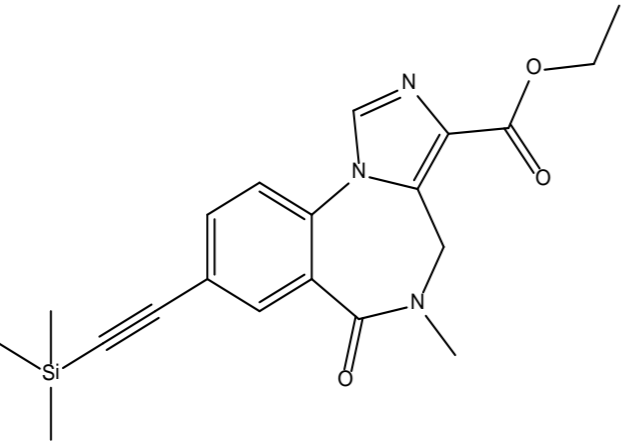<br>$C_{20}H_{23}N_3O_3Si$   | RY-079  | 121.1      | 141.9 | 198.4 | 159  | 5   | 113.7 |      |
| <br>$C_{17}H_{15}N_3O_3$     | RY-080  | C17H15N3O3 | 28.4  | 21.4  | 25.8 | 5.3 | 0.49  | 28.8 |
| <br>$C_{21}H_{25}N_3O_3Si$ | RY-097  |            | 300   | 300   | 300  |     | 300   | 300  |
| <br>$C_{18}H_{17}N_3O_3$   | RY-098  |            | 10.1  | 22.2  | 16.5 |     | 1.68  | 100  |
| <br>$C_{17}H_{16}BrN_3O_3$ | RY-I-26 |            | 1000  | 1000  | 1000 |     | 1000  | 1000 |
| <br>$C_{22}H_{25}N_3O_3Si$ | RY-I-27 |            | 1000  | 1000  | 1000 |     | 1000  | 1000 |

|                                                                                                                 |                         |       |       |       |       |      |
|-----------------------------------------------------------------------------------------------------------------|-------------------------|-------|-------|-------|-------|------|
| 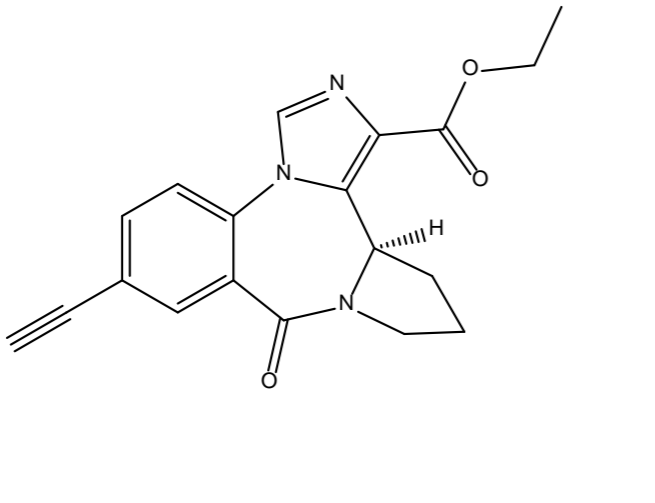<br><chem>C19H17N3O3</chem>    | RY-I-28                 | 283   | 318   | 102   | 7.2   | 61   |
| <br><chem>C19H15N5O2</chem>    | RY-I-29                 | 1000  | 1000  | 1000  | 157   | 1000 |
| <br><chem>C18H14N4O3</chem>   | RY-I-31                 | 10    | 45    | 19    | 6     | 1000 |
| <br><chem>C24H20FN3O2</chem> | SA-01-031               | 2013  | 1887  |       | 609.3 |      |
| <br><chem>C22H18N4O2</chem>  | SA-SH-053-2'N-R-CH3     | 406   | 73565 | 3392  | 16843 |      |
| <br><chem>C22H16FN3O2</chem> | SH-053-2'F (JY-XHe-053) | 21.99 | 12.34 | 34.9  | 0.671 |      |
| <br><chem>C23H18FN3O2</chem> | SH-053-2'F-R-CH3        | 759.1 | 948.2 | 768.8 | 95.17 |      |

|                                                                                                             |                  |       |       |       |       |      |  |
|-------------------------------------------------------------------------------------------------------------|------------------|-------|-------|-------|-------|------|--|
| 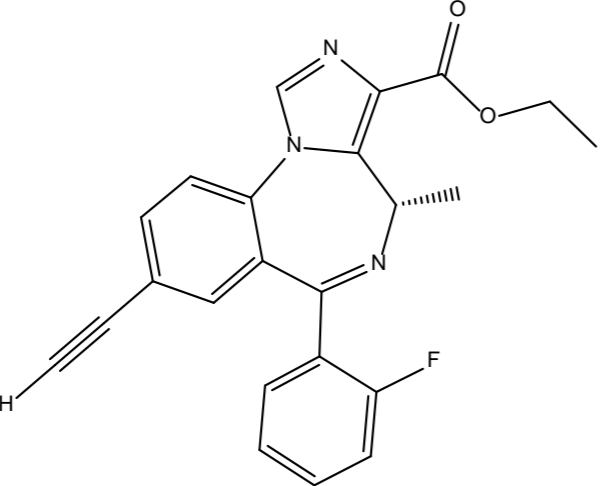<br>$C_{23}H_{18}FN_3O_2$  | SH-053-2'F-S-CH3 | 468.2 | 33.27 | 291.5 | 19.2  |      |  |
| <br>$C_{21}H_{16}N_4O_2$  | SH-053-2'N       | 300   | 160   | 527   | 82    | 5000 |  |
| <br>$C_{22}H_{18}N_4O_2$ | SH-053-2'N-S-CH3 | 6951  | 2331  | 2655  | 744.1 |      |  |
| <br>$C_{23}H_{19}N_3O_2$ | SH-053-R-CH3     | 2026  | 2377  | 1183  | 949.1 |      |  |
| <br>$C_{23}H_{19}N_3O_2$ | SH-053-S-CH3     | 1666  | 1263  | 1249  | 206.4 |      |  |
| <br>$C_{23}H_{19}N_3O_2$ | SH-053-S-CH3     | 5000  | 551   | 540.1 | 201   | 5000 |  |



|                                                                                                                              |           |       |       |       |  |       |
|------------------------------------------------------------------------------------------------------------------------------|-----------|-------|-------|-------|--|-------|
| 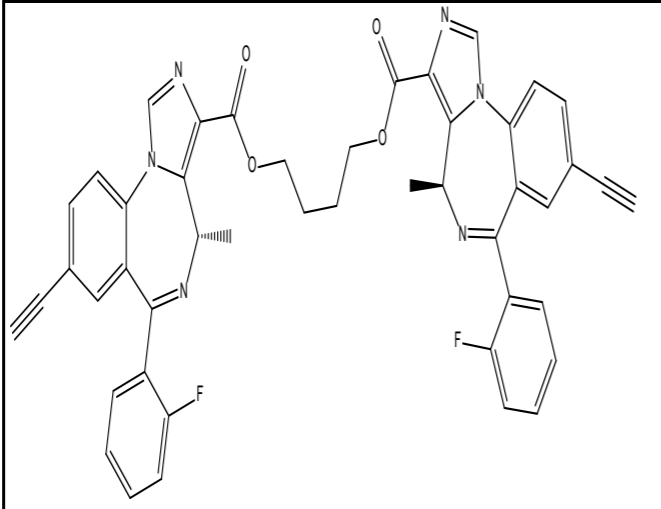 <p><math>C_{46}H_{34}F_2N_6O_4</math></p>  | SH-222A   | 2058  | 292.3 |       |  | 51.24 |
|  <p><math>C_{45}H_{32}F_2N_6O_4</math></p> | SH-223A   | 1231  | 2008  | 3609  |  | 261.3 |
|  <p><math>C_{36}H_{28}FN_3O_4</math></p>  | SH-223B   | 4117  | 4785  | 10661 |  | 911   |
|  <p><math>C_{16}H_{14}N_2O</math></p>     | SH-I-029B | 489   | 576.5 | 706.1 |  | 208.8 |
|  <p><math>C_{14}H_{10}BrN_3O</math></p>   | SH-I-02B  | 29.82 | 1315  | 18    |  | 74.05 |
|  <p><math>C_{16}H_{13}BrN_2O</math></p>   | SH-I-030  | 14.42 | 11.04 | 19.09 |  | 1.89  |

|                                                                                                               |             |       |       |       |       |
|---------------------------------------------------------------------------------------------------------------|-------------|-------|-------|-------|-------|
| 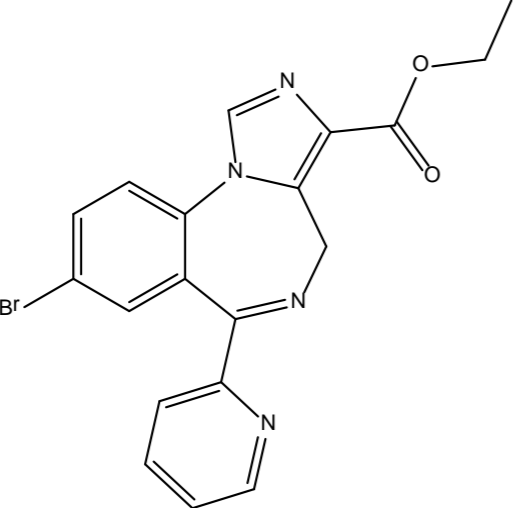<br>$C_{19}H_{15}BrN_4O_2$   | SH-I-031A   | 84.05 | 141.3 | 150.5 | 151.2 |
| <br>$C_{24}H_{24}N_4O_2Si$  | SH-I-031B   | 981.9 | 1004  | 2046  | 356.2 |
| <br>$C_{21}H_{18}BrN_3O_2$ | SH-I-034(S) | 793.4 | 746.8 | 544.6 | 1564  |
| <br>$C_{16}H_{14}N_2O$     | SH-I-035A   | 7389  | 6049  | 16811 | 15793 |
| <br>$C_{16}H_{13}BrN_2O$   | SH-I-035B   | 7439  | 11084 | 3021  | 4043  |
| <br>$C_{21}H_{18}BrN_3O_2$ | SH-I-036    | 587   | 587.9 | 280.2 | 150.8 |

|                                                                                                                               |            |       |       |      |       |  |  |
|-------------------------------------------------------------------------------------------------------------------------------|------------|-------|-------|------|-------|--|--|
| 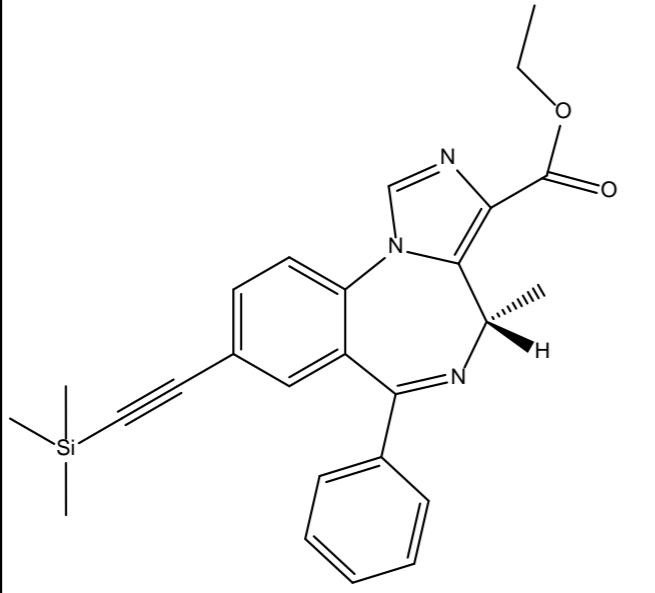 <p><math>C_{28}H_{27}N_3O_2Si</math></p>    | SH-I-038   |       |       |      |       |  |  |
|  <p><math>C_{18}H_{12}BrN_6</math></p>      | SH-I-04    | 7.3   | 6.1   | 5.1  | 7.7   |  |  |
|  <p><math>C_{21}H_{18}BrN_3O_2</math></p>  | SH-I-040 R | 774.4 | 334.1 | 584  | 355.9 |  |  |
|  <p><math>C_{28}H_{27}N_3O_2Si</math></p>  | SH-I-041   |       |       |      |       |  |  |
|  <p><math>C_{18}H_{12}BrFN_2O</math></p>   | SH-I-044   | 5633  | 2034  | 6658 | 3521  |  |  |
|  <p><math>C_{21}H_{17}BrFN_3O_2</math></p> | SH-I-047   | 1710  | 17.52 | 1222 | 1519  |  |  |

|                                                                                                                       |           |       |       |      |       |  |  |
|-----------------------------------------------------------------------------------------------------------------------|-----------|-------|-------|------|-------|--|--|
| 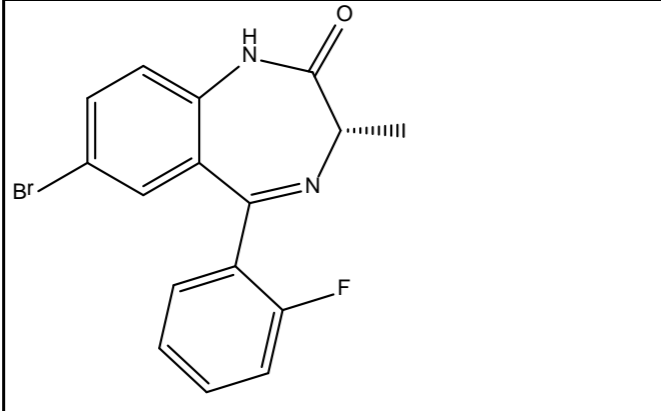 <p><chem>C16H12BrFN2O</chem></p>    | SH-I-048A | 0.77  | 0.17  | 0.38 | 0.11  |  |  |
|  <p><chem>C21H17BrFN3O2</chem></p>  | SH-I-048B |       |       |      |       |  |  |
|  <p><chem>C15H12BrN3O</chem></p>   | SH-I-049R |       |       |      |       |  |  |
|  <p><chem>C15H12BrN3O</chem></p>   | SH-I-049S | 155.6 | 137.2 | 88.5 | 11094 |  |  |
|  <p><chem>C26H26FN3O2Si</chem></p> | SH-I-055  | 5109  | 1638  | 1394 | 223.4 |  |  |
|  <p><chem>C21H21N5Si</chem></p>    | SH-I-06   |       |       |      |       |  |  |

|                                                                                                                             |          |       |       |       |        |  |  |
|-----------------------------------------------------------------------------------------------------------------------------|----------|-------|-------|-------|--------|--|--|
| 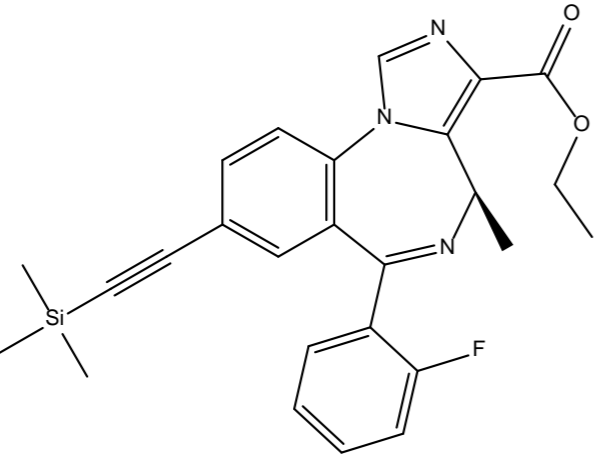 <p><math>C_{26}H_{26}FN_3O_2Si</math></p> | SH-I-064 | 4249  | 3970  | 3412  | 1215   |  |  |
|  <p><math>C_{21}H_{15}N_3O_2</math></p>   | SH-I-067 |       |       |       |        |  |  |
|  <p><math>C_{20}H_{12}BrFN_4O</math></p> | SH-I-085 | 11.08 | 4.866 | 13.75 | 0.24   |  |  |
|  <p><math>C_{22}H_{17}N_3O_2</math></p>  | SH-I-75  | 1487  | 989.9 | 773   | 0.1825 |  |  |
|  <p><math>C_{18}H_{15}BrN_4</math></p>   | SH-I-89S | 12.78 | 8.562 | 8.145 | 3.23   |  |  |

|                                                                                                                  |                   |       |       |       |       |      |
|------------------------------------------------------------------------------------------------------------------|-------------------|-------|-------|-------|-------|------|
| 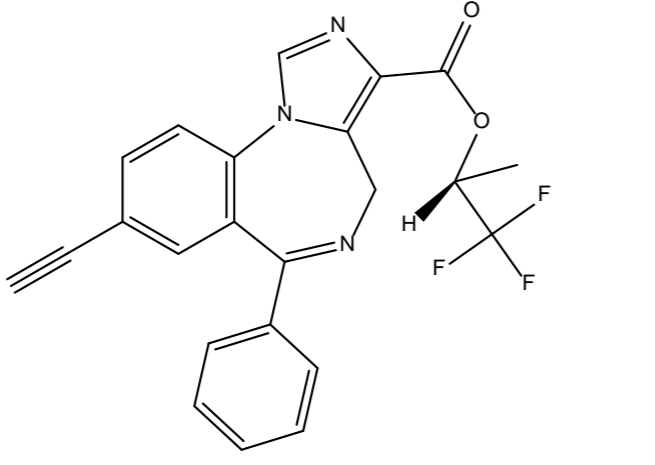<br><chem>C23H16F3N3O2</chem>   | SH-I-R66          | 219.5 | 169.1 | 87.01 | 47.97 |      |
| <br><chem>C23H16F3N3O2</chem>  | SH-I-S66          | 22.93 | 30.36 | 55.26 | 0.69  |      |
| <br><chem>C15H12BrN3O</chem>  | SH-O53-2'N-S-CH3  |       |       |       |       |      |
| <br><chem>C23H18FN3O2</chem>  | SH-O53-S-CH3-2'F  | 350   | 141   | 1237  | 16    | 5000 |
| <br><chem>C18H13N5</chem>     | SH-TRI-108 ANX4   | 143.9 | 81.29 | 103.9 | 45.64 |      |
| <br><chem>C14H14ClN3O2</chem> | SH-TSC-1(PWZ-029) | 362.4 | 180.3 | 328.2 | 6.185 |      |

|                                                                                                               |                    |       |        |       |       |  |  |
|---------------------------------------------------------------------------------------------------------------|--------------------|-------|--------|-------|-------|--|--|
| 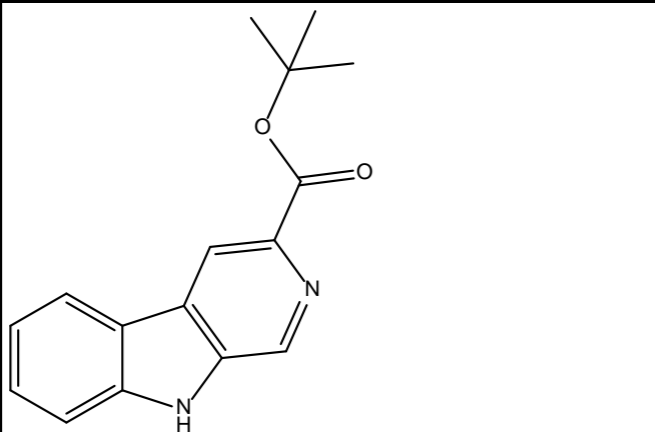<br>$C_{16}H_{16}N_2O_2$     | SH-TSC-2(BCCT)     | 0.03  | 0.0419 | 0.035 | 69.32 |  |  |
| <br>$C_{33}H_{26}N_6O_6$     | SH-TSC-3(XLI-093)  | 1295  | 744.9  | 1814  | 33.99 |  |  |
| <br>$C_{21}H_{17}BrFN_3O_2$ | SH-TSC-5(SH-I-047) | 356.7 | 169.4  | 285   | 75.31 |  |  |
| <br>$C_{21}H_{18}BrN_3O_2$ | SH-TSC-6(SH-I-034) | 913.2 | 283    | 300   | 436.8 |  |  |
| <br>$C_{21}H_{18}BrN_3O_2$ | SH-TSC-7(SH-I-040) | 709   | 1997   | 1256  | 727.4 |  |  |
| <br>$C_{20}H_{16}N_4$      | SH-TS-CH3          | 107.2 | 50.09  | 20.95 | 8.068 |  |  |

|                                                                                                             |                   |      |      |      |      |      |      |
|-------------------------------------------------------------------------------------------------------------|-------------------|------|------|------|------|------|------|
| 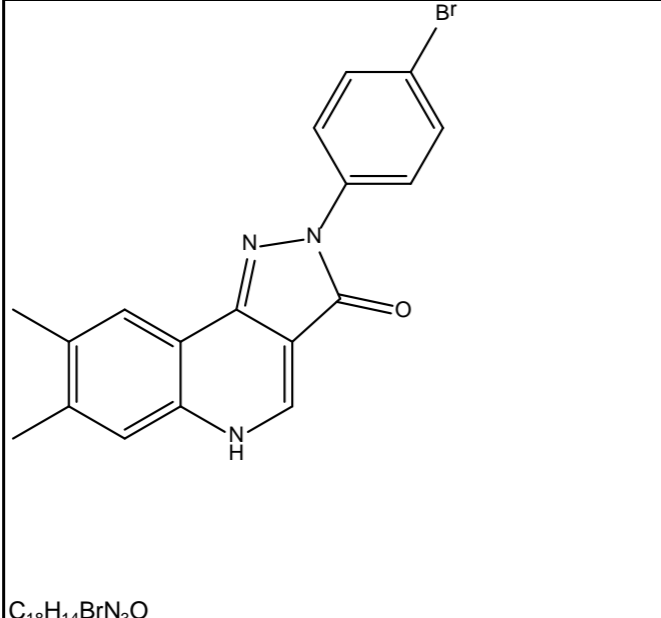<br>$C_{18}H_{14}BrN_3O$   | SHU-1-07          | 108  | 260  | 175  | 940  | 155  | 2535 |
| <br>$C_{18}H_{14}ClN_3O$  | SHU-1-15          | 81   | 63   | 86   | 2175 | 174  | 2167 |
| <br>$C_{18}H_{15}N_3O$   | SHU-1-19          | 4    | 12   | 7    | 48   | 14   | 84   |
| <br>$C_{20}H_{20}N_2OSi$ | SHU-221 (XLI-250) | 492  | 439  | 339  | 3000 | 118  | 3000 |
| <br>$C_{17}H_{12}N_2O$   | SHU-221-1         | 66   | 41   | 43   | 3000 | 9    | 3000 |
| <br>$C_{20}H_{22}N_2Si$  | SHU-223           | 1000 | 1000 | 1000 | 1000 | 1000 | 1000 |



|                                                                                                                                                                                                      |         |      |      |      |      |      |      |
|------------------------------------------------------------------------------------------------------------------------------------------------------------------------------------------------------|---------|------|------|------|------|------|------|
| 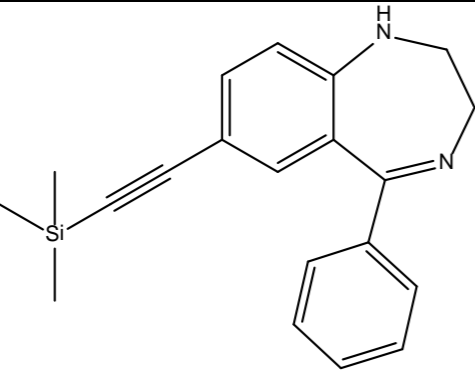<br><chem>C[Si](C)(C)C#CC1=CC=C2C(=N1)C(=N2)C3=CC=CC=C3</chem><br>$C_{20}H_{22}N_2Si$                               | SHU-224 | 1000 | 1000 | 1000 | 1000 | 1000 | 1000 |
| <br><chem>CC(C)C(=O)NC1=CC=C2C(=N1)C(=N2)C3=CC=CC=C3</chem><br>$C_{18}H_{18}N_2O$                                   | SHU-525 | 667  | 667  | 667  | 667  | 667  | 429  |
| <br><chem>C1=CC=C2C(=N1)C(=N2)C3=CC=CC=C3C4=CC=C5C(=N4)C(=N5)C6=CC=CC=C6</chem><br>$C_{17}H_{11}N_3$              | SHU-528 | 667  | 667  | 667  | 667  | 667  | 429  |
| <br><chem>CC(C)C(=O)NC1=CC=C2C(=N1)C(=N2)C3=CC=CC=C3</chem><br>$C_{10}H_{10}N_2O$                                 | SHU-530 | 667  | 667  | 667  | 667  | 667  | 429  |
| <br><chem>C1=CC=C2C(=N1)C(=N2)C3=CC=CC=C3C4=CC=C5C(=N4)C(=N5)C6=CC=CC=C6CN7C=CC=C7</chem><br>$C_{20}H_{13}N_3O_2$ | SHU-537 | 333  | 333  | 333  | 333  | 667  | 429  |
| <br><chem>CC(C)C(=O)NC1=CC=C2C(=N1)C(=N2)C3=CC=CC=C3</chem><br>$C_{17}H_{16}N_2O$                                 | SHU-547 | 667  | 667  | 667  | 667  | 667  | 429  |
| <br><chem>CC(C)C(=O)NC1=CC=C2C(=N1)C(=N2)C3=CC=CC=C3</chem><br>$C_{17}H_{16}N_2O$                                 | SHU-550 | 333  | 333  | 333  | 333  | 333  | 429  |

|                                                                                                          |             |      |      |      |      |      |      |
|----------------------------------------------------------------------------------------------------------|-------------|------|------|------|------|------|------|
| 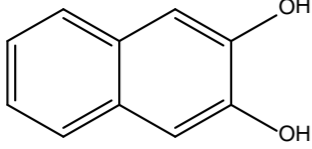<br>$C_{10}H_8O_2$      | SHU-III-032 | 1000 | 1000 | 1000 | 1000 | 1000 | 1000 |
| <br>$C_{20}H_{18}FN_3O$ | SHU-III-24  | 1000 | 1000 | 1000 | 1000 | 1000 | 1000 |
| <br>$C_{12}H_{10}O_2$  | SHU-III-32  | 1000 | 1000 | 1000 | 1000 | 1000 | 1000 |
| <br>$C_{14}H_{12}O_3$ | SHU-III-33  | 1000 | 1000 | 1000 | 1000 | 1000 | 1000 |
| <br>$C_{14}H_{10}O_2$ | SHU-III-34  | 1000 | 1000 | 1000 | 1000 | 1000 | 1000 |
| <br>$C_{14}H_{14}O_2$ | SHU-III-36  | 1000 | 1000 | 1000 | 1000 | 1000 | 1000 |
| <br>$C_{15}H_{12}O_2$ | SHU-III-37  | 1000 | 1000 | 1000 | 1000 | 1000 | 1000 |

|                                                                                     |             |      |      |      |      |      |      |
|-------------------------------------------------------------------------------------|-------------|------|------|------|------|------|------|
| 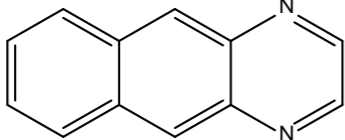   |             |      |      |      |      |      |      |
| $C_{12}H_8N_2$                                                                      | SHU-III-40  | 1000 | 1000 | 1000 | 1000 | 1000 | 1000 |
|    |             |      |      |      |      |      |      |
| $C_{10}H_8O_3$                                                                      | SHU-III-42  | 1000 | 1000 | 1000 | 1000 | 1000 | 1000 |
|   |             |      |      |      |      |      |      |
| $C_{10}H_{10}O_3$                                                                   | SHU-III-42A | 1000 | 1000 | 1000 | 1000 | 1000 | 1000 |
|  |             |      |      |      |      |      |      |
| $C_8H_8O_2$                                                                         | SHU-III-42B | 1000 | 1000 | 1000 | 1000 | 1000 | 1000 |
|  |             |      |      |      |      |      |      |
| $C_{11}H_{10}O_2$                                                                   | SHU-III-44  | 1000 | 1000 | 1000 | 1000 | 1000 | 1000 |
|  |             |      |      |      |      |      |      |
| $C_{10}H_{12}O_2$                                                                   | SHU-III-45  | 1000 | 1000 | 1000 | 1000 | 1000 | 1000 |

|                                                                                                           |            |      |      |      |      |      |      |
|-----------------------------------------------------------------------------------------------------------|------------|------|------|------|------|------|------|
| 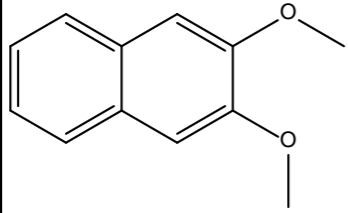<br>$C_{12}H_{12}O_2$    | SHU-III-66 | 1000 | 1000 | 1000 | 1000 | 1000 | 1000 |
| <br>$C_{13}H_{13}NO_2$  | SHU-III-87 | 1000 | 1000 | 1000 | 1000 | 1000 | 1000 |
| <br>$C_{13}H_{13}NO_2$ | SHU-III-88 | 1000 | 1000 | 1000 | 1000 | 1000 | 1000 |
| <br>$C_{13}H_{11}NO_2$ | SHU-III-90 | 1000 | 1000 | 1000 | 1000 | 1000 | 1000 |
| <br>$C_{17}H_{12}NO_2$ | SHU-III-93 | 1000 | 1000 | 1000 | 1000 | 1000 | 1000 |
| <br>$C_{17}H_{14}NO_2$ | SHU-III-94 | 1000 | 1000 | 1000 | 1000 | 1000 | 1000 |

|                                                                                                               |           |      |       |       |      |       |
|---------------------------------------------------------------------------------------------------------------|-----------|------|-------|-------|------|-------|
| 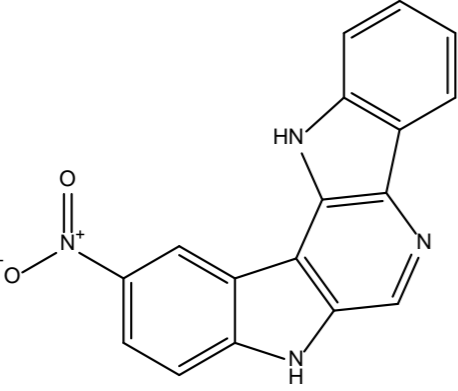<br>$C_{17}H_{16}N_4O_2$     | SLL-II-25 | 244  | 500   | 532   | 1560 | 10000 |
| <br>$C_{17}H_{18}N_2O_4$    | SPH-121   | 0.14 | 1.19  | 1.72  | 4    | 479   |
| <br>$C_{16}H_{16}N_2O_3$   | SPH-165   | 0.63 | 2.79  | 4.85  | 10.4 | 1150  |
| <br>$C_{23}H_{22}N_2O_3$   | SPH-166   | 20.8 | 78.3  | 58.7  | 67.3 | 10000 |
| <br>$C_{17}H_{19}ClN_2O_2$ | SPH-178   | 1000 | 1000  | 1000  | 1000 | 1000  |
| <br>$C_{21}H_{18}N_2O_3$   | SPH-195   | 7.2  | 168.5 | 283.5 | 271  | 10000 |

|                                                                                                             |          |       |       |       |     |       |      |
|-------------------------------------------------------------------------------------------------------------|----------|-------|-------|-------|-----|-------|------|
| 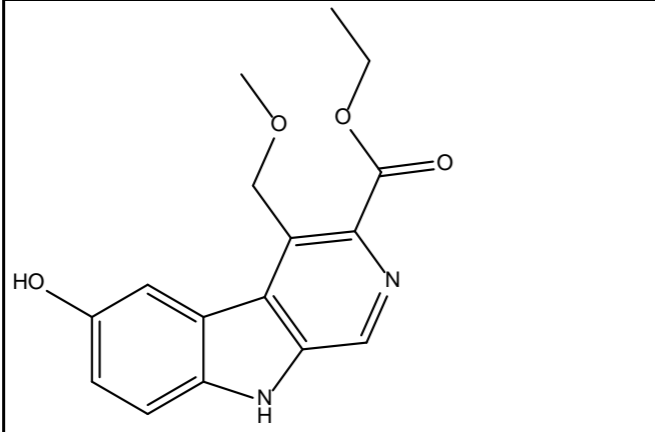<br>$C_{16}H_{16}N_2O_4$   | SPH-38   | 2     | 5.4   | 10.8  |     | 18.5  | 3000 |
| <br>$C_{19}H_{12}N_4O_2$  | SR-II-54 | 174.1 | 363.2 | 946.4 |     | 966.6 |      |
| <br>$C_{18}H_{19}N_3O_3$ | SVO-8-14 | 8     | 25    | 8     | 6.9 | 0.9   | 14   |
| <br>$C_{20}H_{23}N_3O_4$ | SVO-8-20 | 11    | 40    | 28    | 19  | 8.6   | 138  |
| <br>$C_{19}H_{17}N_3O_4$ | SVO-8-30 | 1.1   | 5.3   | 5.3   | 2.8 | 0.6   | 15   |
| <br>$C_{21}H_{19}N_3O_3$ | SVO-8-67 | 7     | 41    | 26    | 15  | 2.3   | 191  |

|                                                                                                                   |              |       |       |       |       |      |     |
|-------------------------------------------------------------------------------------------------------------------|--------------|-------|-------|-------|-------|------|-----|
| 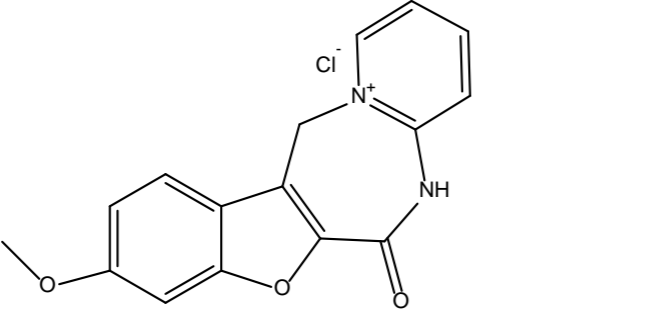<br><chem>C16H13ClN2O3</chem>    | TC-T-JG-24   | 746.5 | 8081  | 1543  | 2364  |      |     |
| <br><chem>C18H19N3O3</chem>      | TC-YT-II-76  | 101.1 | 1.897 | 5.816 | 11.99 |      |     |
| <br><chem>C34H36N6O4</chem>    | TC-YT-III-19 |       |       |       |       |      |     |
| <br><chem>C30H26Cl2N6O6</chem> | TC-YT-TC-2   | 2657  | 737.8 | 643   | 1973  |      |     |
| <br><chem>C17H17N3O3</chem>    | TG-4-29      | 8.3   | 10.2  | 6.9   | 0.4   | 7.61 |     |
|                                                                                                                   | TG-4-29      | 2.8   | 3.9   | 2.7   | 2.1   | 0.18 | 3.9 |

|                                                                                                             |           |      |       |      |     |     |       |
|-------------------------------------------------------------------------------------------------------------|-----------|------|-------|------|-----|-----|-------|
| 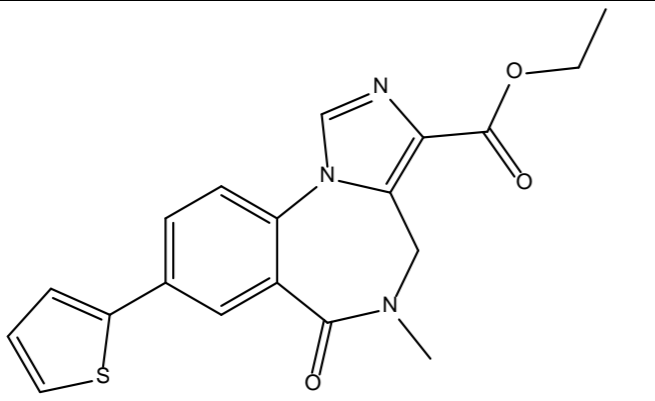<br>$C_{19}H_{17}N_3O_3S$  | TG-4-39   | 1.6  | 34    | 24   | 5.6 | 1.4 | 23    |
| <br>$C_{16}H_{16}N_2O_3$  | TG-I-97   |      |       |      |     |     |       |
| <br>$C_{17}H_{18}N_2O_3$ | TG-II-82  | 1.6  | 2.9   | 2.8  |     | 1   | 1000  |
| <br>$C_{13}H_9N_5O_2$    | TJH-6AZ   |      |       |      |     |     |       |
| <br>$C_{20}H_{19}N_3O_2$ | TJH-IV-43 | 5.42 | 30.19 | 48.9 |     | 475 | 10000 |



|                                                                                     |           |      |      |      |  |       |       |
|-------------------------------------------------------------------------------------|-----------|------|------|------|--|-------|-------|
| 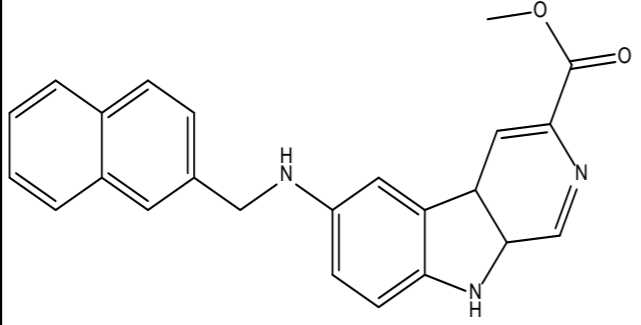   |           |      |      |      |  |       |       |
| $C_{24}H_{21}N_3O_2$                                                                | TJH-IV-50 | 30.7 | 205  | 271  |  | 814   | 10000 |
|   |           |      |      |      |  |       |       |
| $C_{19}H_{23}N_3O_2$                                                                | TJH-IV-51 | 2.39 | 17.4 | 14.5 |  | 316   | 10000 |
|  |           |      |      |      |  |       |       |
| $C_{14}H_9N_3O_2S$                                                                  | TJH-V-88  | 3.41 |      | 30   |  | 140.9 | 10000 |
|  |           |      |      |      |  |       |       |
| $C_{17}H_{12}Cl_2N_4$                                                               | triazolam |      |      |      |  |       |       |
|  |           |      |      |      |  |       |       |
| $C_{25}H_{21}N_3O$                                                                  | TSC-I-93  | 5000 | 5000 | 5000 |  | 304   | 5000  |
|  |           |      |      |      |  |       |       |
| $C_{26}H_{23}N_3O$                                                                  | TSC-I-94  |      |      |      |  |       |       |

|                                                                                                               |                 |       |      |      |      |      |      |
|---------------------------------------------------------------------------------------------------------------|-----------------|-------|------|------|------|------|------|
| 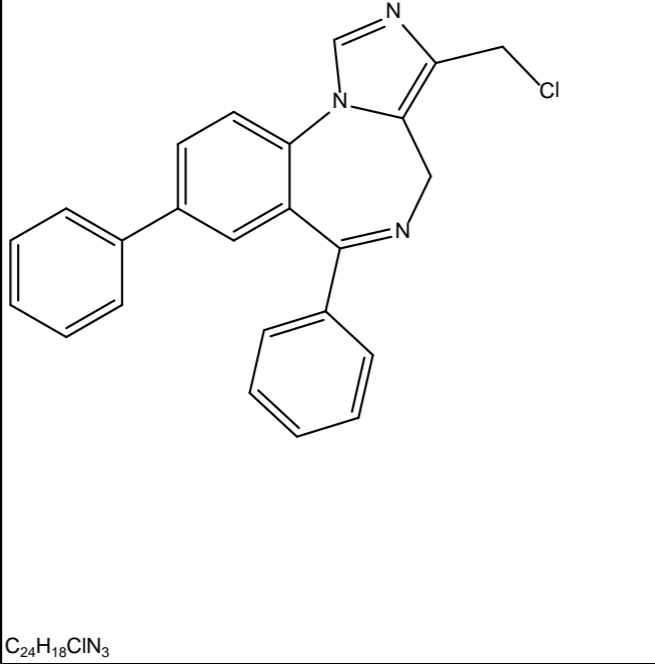<br>$C_{24}H_{18}ClN_3$      | TSC-I-95        |       |      |      |      |      |      |
| <br>$C_{18}H_{16}N_2O_2$     | WY-A-99-2(WYS8) | 0.972 | 111  | 102  | 2000 | 208  | 1980 |
| <br>$C_{15}H_7F_6IN_2O_2$   | WY-B-08         | 78    | 301  | 131  | 3000 | 681  | 3000 |
| <br>$C_{15}H_8F_6N_2O_2$   | WY-B-09-1       | 3.99  | 8    | 32   | 1000 | 461  | 2000 |
| <br>$C_{14}H_9F_3N_2O_2$   | WY-B-09-2       | 1000  | 2000 | 2000 | 3000 | 1000 | 3000 |
| <br>$C_{21}H_{24}N_2O_2Si$ | WY-B-14(WYS7)   | 6.84  | 30   | 36   | 2000 | 108  | 1000 |

|                                                                                                                |                  |      |      |      |      |      |      |
|----------------------------------------------------------------------------------------------------------------|------------------|------|------|------|------|------|------|
| 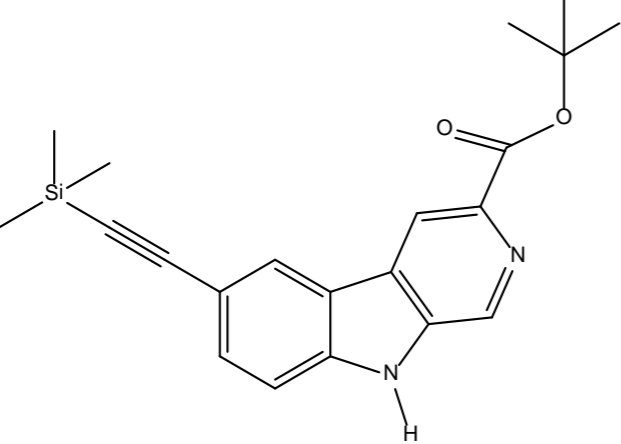<br>$C_{21}H_{24}N_2O_2Si$    | WY-B-14(WYS7)    | 8.5  | 165  | 245  |      | 1786 | 5000 |
| <br>$C_{14}H_{11}N_3O_4$      | WY-B-15          | 0.92 | 0.83 | 0.58 | 2080 | 4.42 | 646  |
| <br>$C_{15}H_{11}Cl_3N_2O_2$ | WY-B-17          | 2000 | 2000 | 2000 | 3000 | 2000 | 5000 |
| <br>$C_{14}H_8F_3IN_2O_2$   | WY-B-20          | 12   | 39   | 47   | 2000 | 122  | 3000 |
| <br>$C_{14}H_9Cl_3N_2O_2$   | WY-B-23-1        | 10   | 33   | 43   | 1000 | 189  | 2000 |
| <br>$C_{15}H_{11}F_3N_2O_3$ | WY-B-23-2(WYS11) | 4.2  | 37.7 | 39   | 2000 | 176  | 69.4 |

|                                                                                                                 |           |       |       |       |      |     |      |
|-----------------------------------------------------------------------------------------------------------------|-----------|-------|-------|-------|------|-----|------|
| 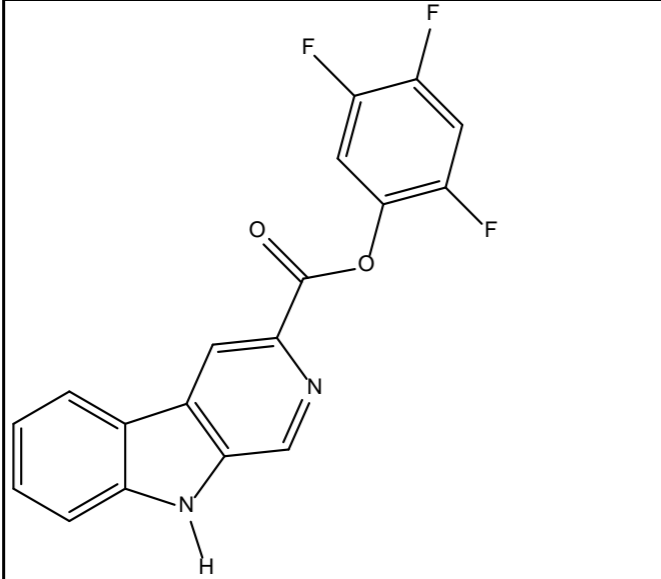<br>$C_{18}H_9F_3N_2O_2$       | WY-B-24   | 22.02 | 177   | 44.78 | 3000 | 422 | 3000 |
| <br>$C_{19}H_{17}F_3N_2O_2Si$ | WY-B-25   | 7.6   | 40    | 66    | 2000 | 263 | 2000 |
| <br>$C_{16}H_9F_3N_2O_2$     | WY-B-26-2 | 4.45  | 44.57 | 42.66 | 2000 | 124 | 2000 |
| <br>$C_{18}H_{11}F_3N_2O_3$  | WY-B-27-1 | 26    | 143   | 117   | 3000 | 127 | 2000 |
| <br>$C_{18}H_{11}F_3N_2O_2S$ | WY-B-27-2 | 9.19  | 111   | 72    | 2000 | 449 | 2000 |
| <br>$C_{20}H_{13}F_3N_2O_2$  | WY-B-29-2 | 25    | 137   | 125   | 2000 | 299 | 2000 |

|                                                                                                                                                                                        |                    |         |      |      |       |      |      |
|----------------------------------------------------------------------------------------------------------------------------------------------------------------------------------------|--------------------|---------|------|------|-------|------|------|
| 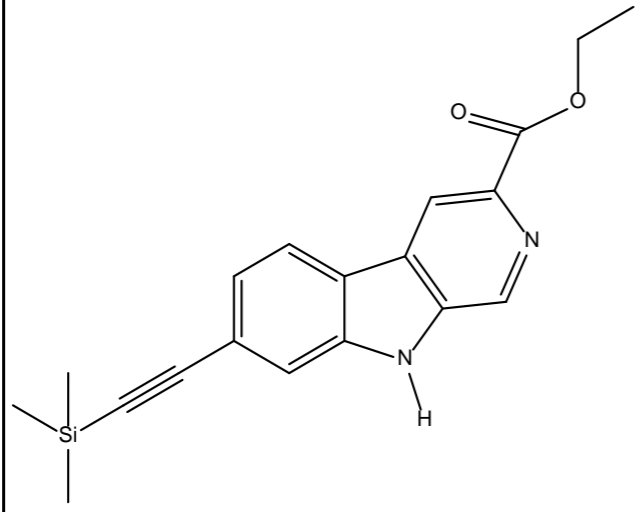<br><chem>CC(C)(C)[Si](C)(C)C#Cc1ccc2c(c1)c(c[nH]2)C=C(C=C2)C(=O)OCC</chem><br>$C_{19}H_{20}N_2O_2Si$ | WY-B-99-1          | 4.4     | 4.5  | 5.58 | 2000  | 47   | 2000 |
| <br>$C_{44}H_{48}N_4O_8$                                                                             | WYS1 C45H50N4O6    | missing |      |      |       |      |      |
| <br>$C_{14}H_9F_3N_2O_2$                                                                            | WYS10 C14H9F3N2O2  | 0.88    | 36   | 25.6 | 548.7 | 15.3 |      |
| <br>$C_{20}H_{18}N_2O_2S$                                                                           | WYS12 C20H18N2O2S  | 37      | 166  | 314  | 2861  | 5000 |      |
| <br>$C_{20}H_{18}N_2O_3$                                                                            | WYS13 C20H18N2O3   | 2.442   | 13   | 27.5 | 163   | 5000 |      |
| <br>$C_{33}H_{28}F_3N_4O_4$                                                                         | WYS14 C34H29F3N4O4 | 798     | 5000 |      | 5000  | 5000 |      |

|                                                                                                                  |                    |         |      |      |      |      |      |
|------------------------------------------------------------------------------------------------------------------|--------------------|---------|------|------|------|------|------|
| 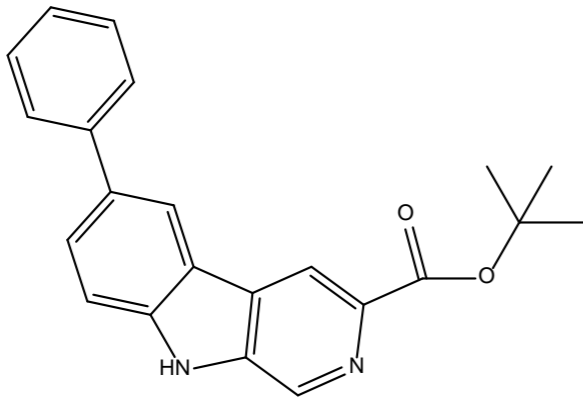<br><chem>C22H20N2O2</chem>     | WYS15 C22H20N2O2   | 3.63    | 2.02 | 44.3 | 76.5 | 5000 |      |
| <br><chem>C15H14N2O2</chem>     | WYS16 C18H22N2O2   | 5000    | 5000 |      | 5000 | 5000 |      |
| <br><chem>C17H12N2O2</chem>    | WYS17 C17H18N2O2   | missing |      |      |      |      |      |
| <br><chem>C20H18N2O2</chem>   | WYS18 C21H22N2O2   | missing |      |      |      |      |      |
| <br><chem>C26H32N2O4Si</chem> | WYS19 C26H32N2O4Si |         |      |      |      |      |      |
| <br><chem>C34H30N4O4</chem>   | WYS2 C35H34N4O4    |         |      |      |      |      |      |
| <br><chem>C34H30N4O4</chem>   | WYS2 C35H34N4O4    | 30      | 124  | 100  | 300  | 300  | 4000 |

|                                                                                                             |                                                                      |         |      |      |  |      |      |
|-------------------------------------------------------------------------------------------------------------|----------------------------------------------------------------------|---------|------|------|--|------|------|
| 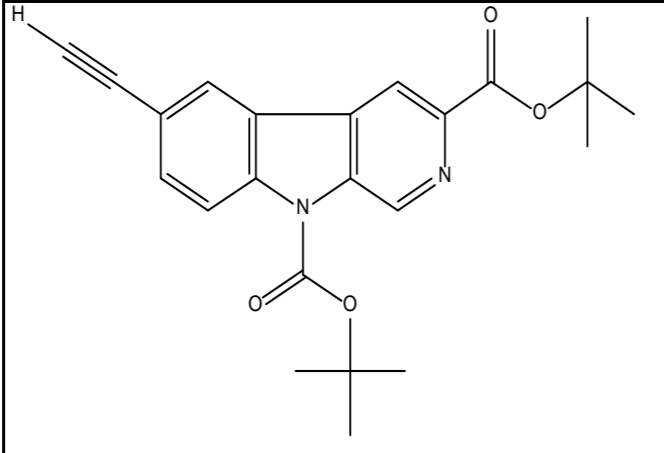<br>$C_{23}H_{24}N_2O_4$   | WYS20 C <sub>23</sub> H <sub>24</sub> N <sub>2</sub> O <sub>4</sub>  | 450     | 5000 |      |  | 5000 | 5000 |
| <br>$C_{21}H_{23}IN_2O_4$ | WYS21 C <sub>21</sub> H <sub>23</sub> IN <sub>2</sub> O <sub>4</sub> | missing |      |      |  |      |      |
| <br>$C_{34}H_{34}N_4O_4$ | WYS3 C <sub>35</sub> H <sub>38</sub> N <sub>4</sub> O <sub>4</sub>   | 241     | 5000 | 1841 |  | 5000 | 5000 |
| <br>$C_{46}H_{46}N_4O_8$ | WYS4 C <sub>48</sub> H <sub>56</sub> N <sub>4</sub> O <sub>8</sub>   | missing |      |      |  |      |      |
| <br>$C_{37}H_{42}N_4O_4$ | WYS5 C <sub>37</sub> H <sub>42</sub> N <sub>4</sub> O <sub>4</sub>   | 5000    | 5000 |      |  | 5000 | 5000 |
| <br>$C_{36}H_{32}N_4O_4$ | WYS6 C <sub>37</sub> H <sub>35</sub> N <sub>4</sub> O <sub>4</sub>   | 120     | 1059 | 3942 |  | 5000 | 5000 |

|                                                                                     |                    |         |        |        |        |      |  |
|-------------------------------------------------------------------------------------|--------------------|---------|--------|--------|--------|------|--|
| 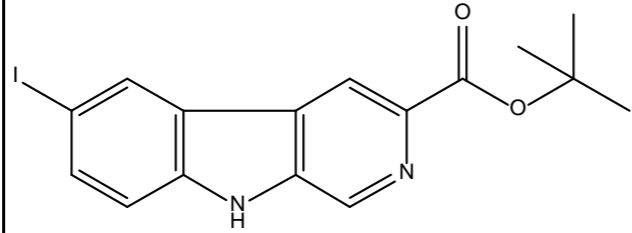   |                    |         |        |        |        |      |  |
| $C_{16}H_{15}IN_2O_2$                                                               | WYS9 C16H15IN2O2   | 2.72    | 22.2   | 23.1   | 562    | 122  |  |
|   |                    |         |        |        |        |      |  |
| $C_{16}H_{16}N_2O_2$                                                                | WYSC1 (BCCt)       | 1.094   | 5.44   | 12.3   | 69.8   | 21.2 |  |
|  |                    |         |        |        |        |      |  |
| $C_{15}H_{11}F_3N_2O_2$                                                             | WYSC2 C15H11F3N2O2 | 14.14   | 113    | 170    | 518    | 61.2 |  |
|  |                    |         |        |        |        |      |  |
| $C_{18}H_{16}N_2O_2$                                                                | WY-TSC-4(WYS8)     | 109.431 | 2374.5 | 1656.4 | 2663.5 |      |  |
|                                                                                     |                    |         |        |        |        |      |  |
|                                                                                     | WY-TSC-4(WYS8)     | 0.007   | 0.99   | 1.63   | 51.04  |      |  |
|  |                    |         |        |        |        |      |  |
| $C_{19}H_{14}N_2O$                                                                  | WZ-030             | 279     | 210    | 200    | 45.15  | 1000 |  |



|                                                                                                                  |        |      |       |       |  |      |      |
|------------------------------------------------------------------------------------------------------------------|--------|------|-------|-------|--|------|------|
| 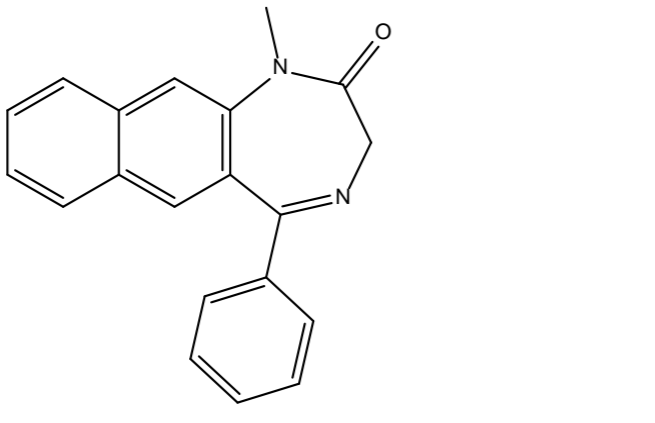<br><chem>C20H18N2O</chem>      | WZ-032 | 965  | 345   | 590   |  | 150  | 3000 |
| <br><chem>C19H15FN2O</chem>     | WZ-069 | 40   | 30.5  | 38.5  |  | 12.6 | 1000 |
| <br><chem>C20H15FN2O</chem>    | WZ-070 | 72.7 | 30.7  | 53.2  |  | 18.6 | 300  |
| <br><chem>C14H13ClN2OS</chem> | WZ-113 | 19.2 | 13.2  | 13.4  |  | 11.5 | 300  |
| <br><chem>C14H13ClN2O2</chem> | WZ-148 | 300  | 300   | 300   |  | 300  | 300  |
| <br><chem>C19H15FN2O</chem>   | WZ-153 | 199  | 151.3 | 191.6 |  | 73.5 | 1000 |
| <br><chem>C20H15FN2O</chem>   | WZ-154 | >300 | >300  | >300  |  | >300 | >300 |

|                                                                                                               |           |      |      |      |      |      |
|---------------------------------------------------------------------------------------------------------------|-----------|------|------|------|------|------|
| 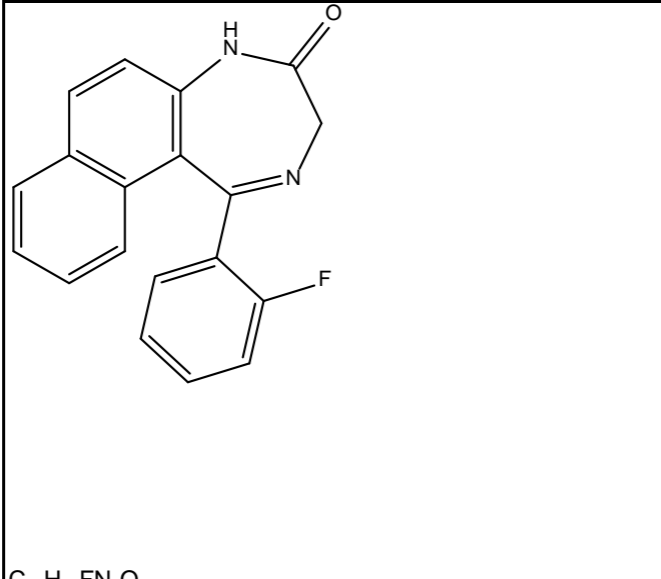<br>$C_{19}H_{13}FN_2O$      | WZ-175    | 1000 | 1000 | 1000 | 1000 | 1000 |
| <br>$C_{20}H_{15}FN_2O$     | WZ-176    | >300 | >300 | >300 | >300 | >300 |
| <br>$C_{13}H_{15}FN_2O$    | WZ-185    | >300 | >300 | >300 | >300 | >300 |
| <br>$C_{14}H_{13}ClN_2OS$  | WZ-198    | >300 | >300 | >300 | >300 | >300 |
| <br>$C_{15}H_{11}N_3O_2$   | WZ-201    |      |      |      |      |      |
| <br>$C_{24}H_{25}N_3O_3Si$ | XHE-I-027 | 1000 | 1000 | 1000 | 180  |      |

|                                                                                                               |           |      |      |      |      |      |      |
|---------------------------------------------------------------------------------------------------------------|-----------|------|------|------|------|------|------|
| 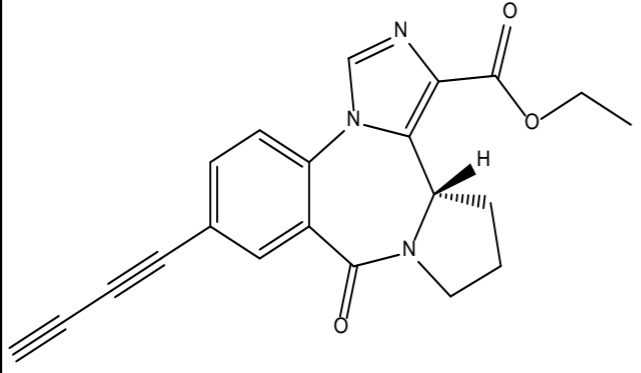<br>$C_{21}H_{17}N_3O_3$     | XHE-I-030 | 1000 | 1000 | 1000 | 1000 | 53   | 1000 |
| <br>$C_{23}H_{19}N_3OSi$    | XHE-I-038 | 7.3  | 5    | 34   |      | 132  | 1000 |
| <br>$C_{20}H_{11}N_3O$     | XHE-I-043 | 31   | 95   | 272  |      | 81   | 1000 |
| <br>$C_{15}H_{14}BrN_3O_3$ | XHE-I-046 | 1000 | 1000 | 1000 |      | 1000 | 1000 |
| <br>$C_{21}H_{19}N_3O_3$   | XHE-I-048 | 220  | 440  | 481  |      | 50   | 160  |
| <br>$C_{22}H_{23}N_3O_3Si$ | XHE-I-050 | 254  | 300  | 300  |      | 195  | 3000 |

|                                                                                                                |                |        |        |       |       |        |        |
|----------------------------------------------------------------------------------------------------------------|----------------|--------|--------|-------|-------|--------|--------|
| 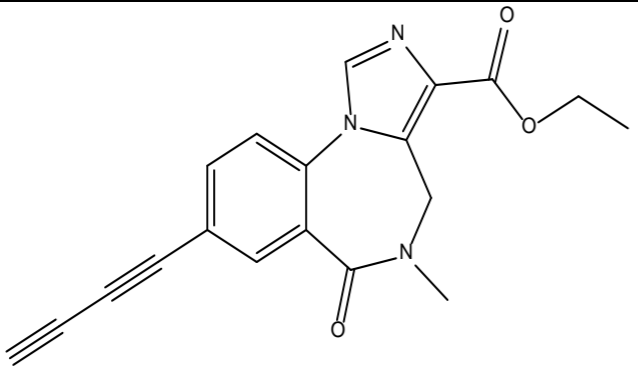<br>$C_{19}H_{15}N_3O_3$      | XHE-I-051      | 35     | 39     | 42    |       | 5.3    | 979    |
| <br>$C_{17}H_{11}Br_2N_3O_2$ | XHE-I-055b     | 615    | 1000   | 1000  | 2213  | 268    | 1524   |
| <br>$C_{24}H_{19}N_3O$      | XHE-I-065      | 7.2    | 17     | 18    | 500   | 57     | 500    |
| <br>$C_{21}H_{21}N_3O_3$    | XHE-I-066A(SS) | 196.66 | 176.14 | 95.4  | 74.26 | 125.06 | 186.25 |
| <br>$C_{21}H_{21}N_3O_3$    | XHE-I-066B(SR) | 76.04  | 73.56  | 45.05 | 22.72 | 53.42  | 51.32  |

|                                                                                                               |            |      |      |      |      |     |       |
|---------------------------------------------------------------------------------------------------------------|------------|------|------|------|------|-----|-------|
| 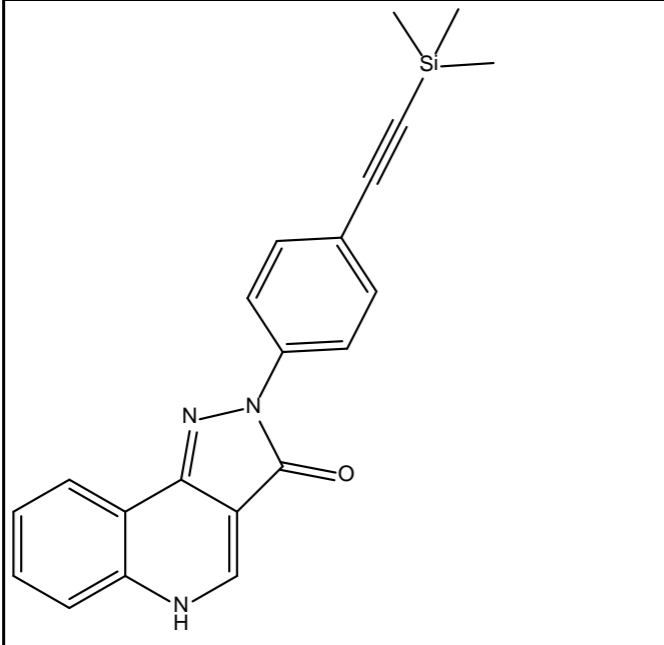<br>$C_{21}H_{19}N_3OSi$     | XHE-I-073  | 62   | 155  | 217  | 1000 | 393 | 1000  |
| <br>$C_{19}H_{13}N_3O$      | XHE-I-093  | 2    | 7.1  | 8.9  | 1107 | 20  | 1162  |
| <br>$C_{21}H_{17}N_3O_2$   | XHE-I-096  | 3079 | 1000 | 4636 | 1601 | 567 | 2712  |
| <br>$C_{24}H_{27}N_3O_3Si$ | XHE-I-47   | 705  | 2502 | 2460 |      | 480 | 10000 |
| <br>$C_{19}H_{21}N_3O_3$   | XHE-II-002 | 8.3  | 18   | 13   | 3.9  | 1.5 | 11    |

|                                                                                                               |             |     |      |      |      |      |      |
|---------------------------------------------------------------------------------------------------------------|-------------|-----|------|------|------|------|------|
| 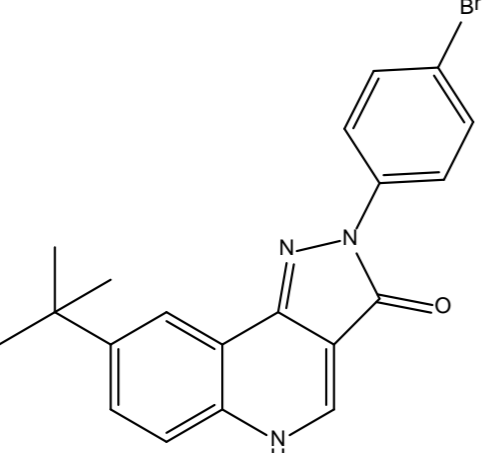<br>$C_{20}H_{18}BrN_2O$     | XHE-II-006a | 4.7 | 4.4  | 20   | 1876 | 89   | 3531 |
| <br>$C_{20}H_{18}ClN_2O$    | XHE-II-006b | 3.7 | 15   | 12   | 1897 | 144  | 1000 |
| <br>$C_{22}H_{19}N_2O$     | XHE-II-011  | 9   | 60   | 39   | 3233 | 90   | 1000 |
| <br>$C_{20}H_{16}BrN_2O_2$ | XHE-II-012  | 49  | 24   | 31   | 1042 | 14   | 2038 |
| <br>$C_{25}H_{27}N_2OSi$   | XHE-II-014  | 329 | 1098 | 1156 | 1000 | 2462 | 1000 |

|                                                                                                                                                   |            |      |      |      |      |      |      |
|---------------------------------------------------------------------------------------------------------------------------------------------------|------------|------|------|------|------|------|------|
| 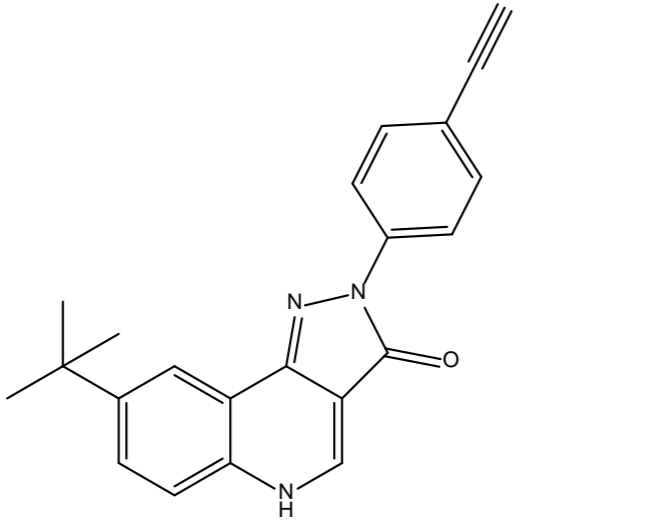 <p>C<sub>22</sub>H<sub>19</sub>N<sub>3</sub>O</p>               | XHE-II-017 | 3.3  | 10   | 7    | 258  | 17   | 294  |
|  <p>C<sub>28</sub>H<sub>27</sub>N<sub>3</sub>O</p>              | XHE-II-019 | 273  | 428  | 762  | 1000 | 1464 | 1000 |
|  <p>C<sub>20</sub>H<sub>19</sub>N<sub>3</sub>O</p>             | XHE-II-024 | 0.09 | 0.18 | 0.32 | 14   | 0.24 | 11   |
|  <p>C<sub>22</sub>H<sub>17</sub>N<sub>3</sub>O<sub>2</sub></p> | XHE-II-053 | 287  | 45   | 96   | 1504 | 13.8 | 1000 |
|  <p>C<sub>17</sub>H<sub>13</sub>N<sub>3</sub>O<sub>2</sub></p> | XHE-II-065 | 1000 | 409  | 216  | 37   | 6.4  | 175  |
|  <p>C<sub>19</sub>H<sub>19</sub>N<sub>3</sub>O<sub>4</sub></p> | XHE-II-070 | 352  | 532  | 454  | 45%  | 55   | 1000 |

|                                 |                          |      |      |      |      |      |      |
|---------------------------------|--------------------------|------|------|------|------|------|------|
| <p><chem>C18H19N3O3</chem></p>  | XHE-II-073A (R ENRICHED) | 5.9  | 11   | 10   | 15   | 1.18 | 140  |
| <p><chem>C18H19N3O3</chem></p>  | XHE-II-073B (S-ENRICHED) | 11   | 17   | 12   | 33   | 2.1  | 269  |
| <p><chem>C23H27N3O3</chem></p>  | XHE-II-077               | 1363 | 1000 | 3403 | 3561 | 1000 | 1000 |
| <p><chem>C20H19N3O</chem></p>   | XHE-II-087a              | 1604 | 1000 | 1000 | 1000 | 1000 | 1000 |
| <p><chem>C20H18BrN3O</chem></p> | XHE-II-087c              | 1000 | 1000 | 1000 | 1000 | 1000 | 1000 |
| <p><chem>C24H25N3O</chem></p>   | XHE-II-098a              | 1000 | 1000 | 1000 | 1000 | 1000 | 1000 |



|                                                                                                             |             |      |      |      |      |      |      |
|-------------------------------------------------------------------------------------------------------------|-------------|------|------|------|------|------|------|
| 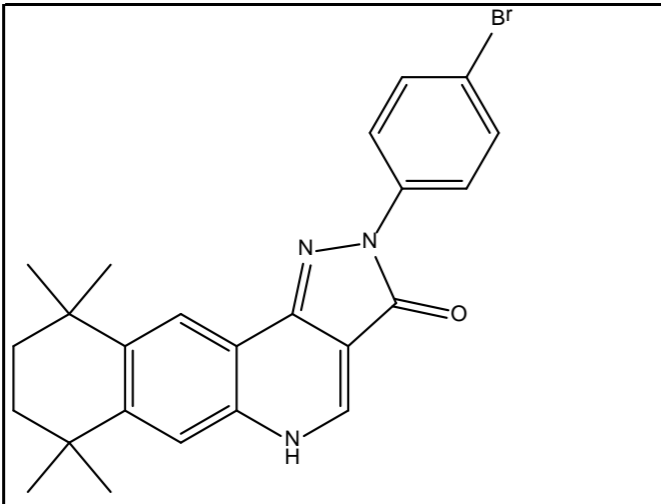<br>$C_{24}H_{24}BrN_3O$   | XHE-II-098b | 1000 | 1000 | 1000 | 1000 | 1000 | 1000 |
| <br>$C_{24}H_{24}ClN_3O$  | XHE-II-098c | 1000 | 1000 | 1000 | 1000 | 1000 | 1000 |
| <br>$C_{15}H_{15}N_3O_3$ | XHE-III-04  | 1.2  | 2    | 1.1  | 219  | 0.4  | 500  |
| <br>$C_{16}H_{10}BrN_3O$ | XHE-III-06a | 1    | 2    | 1    | 5    | 1.8  | 37   |
| <br>$C_{16}H_9BrClN_3O$  | XHE-III-06b | 32   | 33   | 20   | 299  | 28.6 | 740  |
| <br>$C_{16}H_9Br_2N_3O$  | XHE-III-06c | 34   | 44   | 29   | 210  | 23   | 319  |

|                                                                                                                  |            |      |      |      |      |      |      |
|------------------------------------------------------------------------------------------------------------------|------------|------|------|------|------|------|------|
| 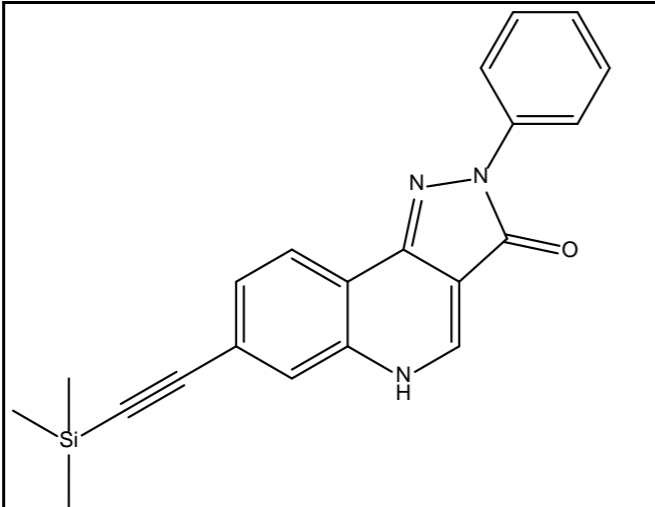<br><chem>C21H19N3OSi</chem>    | XHE-III-12 | 240  |      | 1000 | 1000 | 181  | 536  |
| <br><chem>C17H17N3O3</chem>    | XHE-III-13 | 7.3  |      | 7.1  | 880  | 1.6  | 311  |
| <br><chem>C18H11N3O</chem>    | XHE-III-14 | 2.6  |      | 10   | 13   | 2    | 7    |
| <br><chem>C20H18FN3O</chem>   | XHE-III-24 | 0.25 |      | 8    | 222  | 10   | 328  |
| <br><chem>C15H14ClN3O3</chem> | XHE-III-49 | 1.3  | 5.5  | 4.2  | 38.7 | 11.3 | 85.1 |
| <br><chem>C12H8ClN3O</chem>   | XHE-III-54 | 1071 | 1624 | 2048 | 1000 | 1158 | 1000 |

|                                                                                                             |             |       |      |      |      |      |      |
|-------------------------------------------------------------------------------------------------------------|-------------|-------|------|------|------|------|------|
| 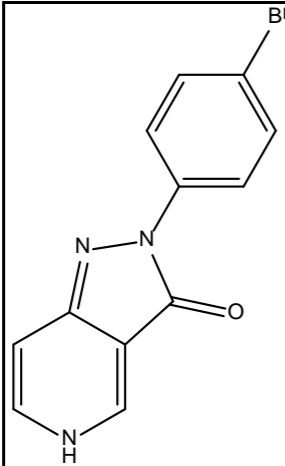<br>$C_{12}H_8BrN_3O$      | XHE-III-56b | 1005  | 1642 | 1928 | 1000 | 1300 | 1000 |
| <br>$C_{17}H_{17}N_3OSi$  | XHE-III-67  | 1000  | 1000 | 1000 | 1000 | 1000 | 1000 |
| <br>$C_{12}H_8FN_3O$     | XHE-III-69  | 3433  | 1000 | 1000 | 1000 | 1000 | 1000 |
| <br>$C_{12}H_9N_3O$      | XHE-III-70  | 997.5 | 2356 | 2484 | 711  | 500  | 1000 |
| <br>$C_{14}H_9N_3O$      | XHE-III-73  | 1000  | 303  | 942  | 1000 | 492  | 1000 |
| <br>$C_{20}H_{23}N_3O_4$ | XHE-III-74  | 77    | 105  | 38   | 0.42 | 2.2  | 5.8  |

|                                                                                                               |                 |       |      |       |      |      |      |
|---------------------------------------------------------------------------------------------------------------|-----------------|-------|------|-------|------|------|------|
| 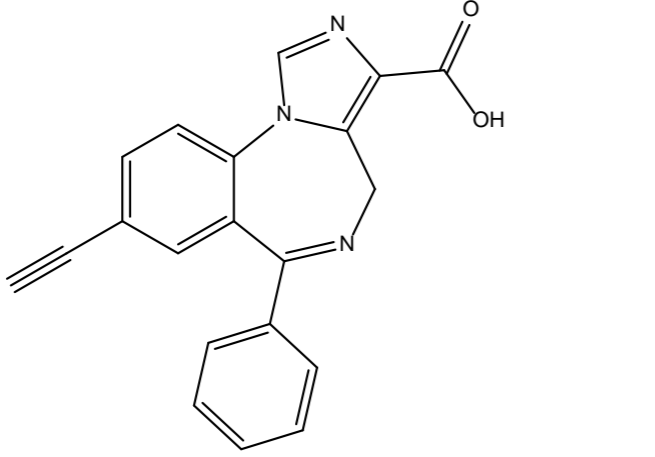<br>$C_{20}H_{13}N_3O_2$     | XHE-II-O53-ACID | 50.35 | 11.8 | 44    |      | 5.9  | 5000 |
| <br>$C_{13}H_{14}N_2O_3$     | XLI-?           |       |      |       |      |      |      |
| <br>$C_{33}H_{26}N_6O_6$    | XLI-093         | 1000  | 1000 | 858   | 1550 | 15   | 2000 |
| <br>$C_{10}H_8Br_2N_2O_2$  | XLI-1?          |       |      |       |      |      |      |
| <br>$C_{18}H_{12}BrN_3O_2$ | XLI-12TC        |       |      |       |      |      |      |
| <br>$C_{12}H_{11}BrN_2O_2$ | XLI-13TC        | 2078  | 5289 | 618.7 |      | 8382 |      |
| <br>$C_{19}H_{19}N_3O_4$   | XLI-14TC        |       |      |       |      |      |      |

|                                                                                                              |          |       |       |       |  |       |       |
|--------------------------------------------------------------------------------------------------------------|----------|-------|-------|-------|--|-------|-------|
| 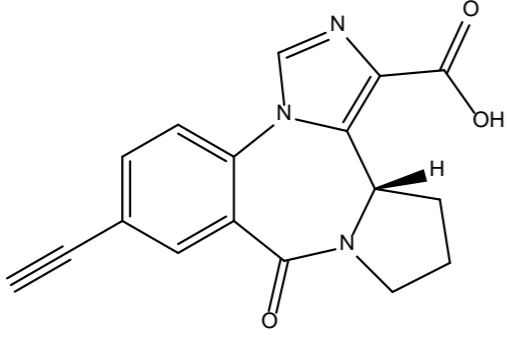<br>$C_{17}H_{13}N_3O_3$    | XLI-15TC |       |       |       |  |       |       |
| <br>$C_{15}H_{12}BrN_3O_3$  | XLI-16TC | 7664  | 3515  | 787.4 |  | 1831  |       |
| <br>$C_{19}H_{20}BrN_3O_3$ | XLI-17TC | 224.8 | 106.6 | 120.6 |  | 92.43 |       |
| <br>$C_{18}H_{19}N_3O_4$  | XLI-18TC |       |       |       |  |       |       |
| <br>$C_{13}H_{14}N_2O_3$  | XLI-19TC |       |       |       |  |       |       |
| <br>$C_{17}H_{13}BrN_4$   | XLI-2?   |       |       |       |  |       |       |
| <br>$C_{35}H_{30}N_6O_6$  | XLI-210  | 231   | 661   | 2666  |  | 5.4   | 54.22 |

|                                                                                                                  |                   |                        |      |      |     |      |      |      |
|------------------------------------------------------------------------------------------------------------------|-------------------|------------------------|------|------|-----|------|------|------|
| 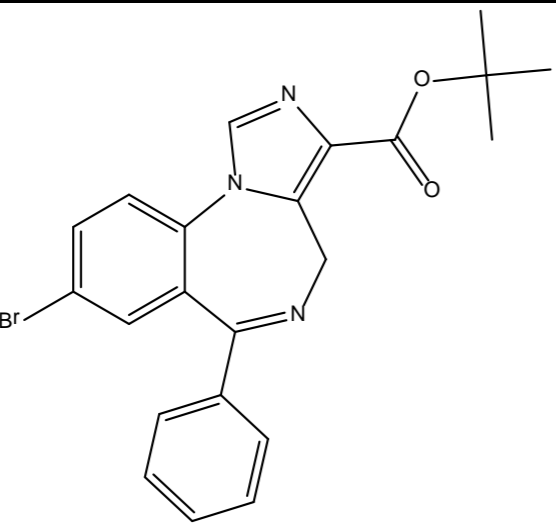<br>$C_{22}H_{20}BrN_3O_2$      | XLI223            | $C_{22}H_{20}BrN_3O_2$ | 14   | 8.7  | 18  | 1000 | 10   | 2000 |
| <br>$C_{27}H_{29}N_3O_2Si$     | XLI224            | $C_{27}H_{29}N_3O_2Si$ | 333  | 333  | 333 | 3000 | 333  | 2000 |
| <br>$C_{24}H_{21}N_3O_2$      | XLI225            | $C_{24}H_{21}N_3O_2$   | 333  | 225  | 174 | 3000 | 110  | 2000 |
| <br>$C_{23}H_{21}F_6N_3O_3Si$ | XLI-232           |                        |      |      |     |      |      |      |
| <br>$C_{20}H_{20}N_2OSi$      | XLI-250 (SHU-221) |                        | 1000 | 1000 | 339 | 1000 | 118  | 1000 |
| <br>$C_{17}H_{13}BrN_4$       | XLI268            | $C_{17}H_{13}BrN_4$    | 2.81 | 0.69 |     |      | 0.62 |      |

|                                                                                                                   |         |            |       |       |       |  |       |
|-------------------------------------------------------------------------------------------------------------------|---------|------------|-------|-------|-------|--|-------|
| 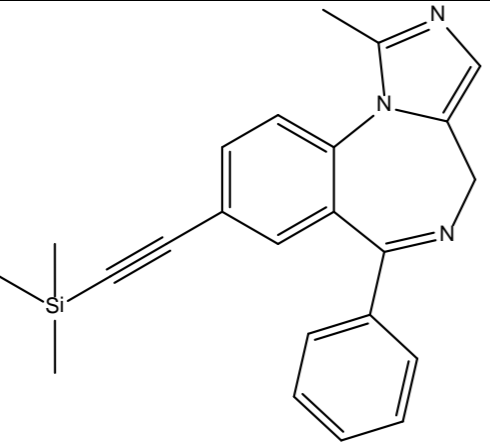<br><chem>C23H23N3Si</chem>      | XLI269  | C22H22N4Si | 221.8 | 154.2 |       |  | 15.51 |
| <br><chem>C19H14N4</chem>        | XLI270  | C19H14N4   | 36.39 | 25.81 |       |  | 5.291 |
| <br><chem>C20H19N3O3</chem>     | XLI275  | C20H19N3O3 | 35.61 |       |       |  |       |
| <br><chem>C19H10BrClN2O</chem> | XLI-286 |            | 0.051 | 0.064 | 0.118 |  | 0.684 |
| <br><chem>C19H13ClN4</chem>    | xli296  |            |       |       |       |  |       |
| <br><chem>C17H13BrN4</chem>    | XLI-2TC |            | 3.442 | 1.673 | 44.08 |  | 1.121 |
| <br><chem>C18H19N3O4</chem>    | XLI-317 |            | 60.24 | 24.05 | 4.562 |  | 0.295 |

|                                                                                                                |                      |      |      |      |       |      |  |
|----------------------------------------------------------------------------------------------------------------|----------------------|------|------|------|-------|------|--|
| 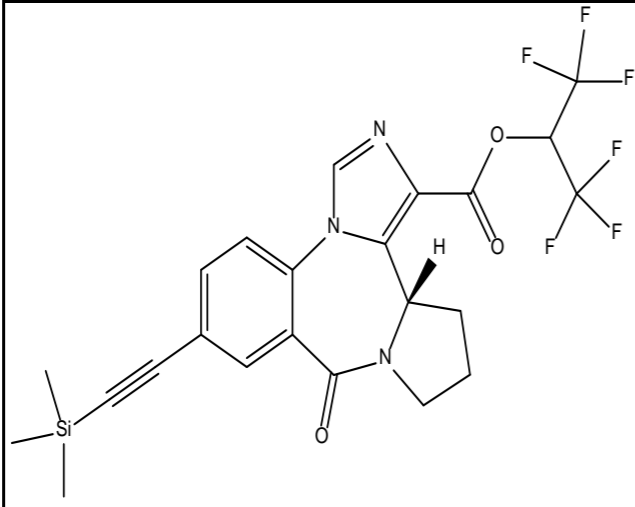<br>$C_{23}H_{21}F_6N_3O_3Si$ | XLI-332              | 1390 | 1507 | 3405 | 132.1 |      |  |
| <br>$C_{21}H_{23}N_3O_3$     | XLI337 C21H23N3O3    |      |      |      |       |      |  |
| <br>$C_{23}H_{21}ClN_4$     | XLI338 C23H21ClN4    | 380  | 189  | 692  | 5000  | 5000 |  |
| <br>$C_{23}H_{22}N_4$       | XLI339 C23H22N4      | 5000 | 625  | 5000 | 5000  | 5000 |  |
| <br>$C_{26}H_{25}N_3O_2$    | XLI340 C26H25N3O2    |      |      |      |       |      |  |
| <br>$C_{20}H_{19}ClN_2OSi$  | XLI343 C20H19ClN2OSi | 6.4  | 17.7 |      | 150.5 |      |  |



|                                                                                                                   |                      |        |        |       |  |       |      |
|-------------------------------------------------------------------------------------------------------------------|----------------------|--------|--------|-------|--|-------|------|
| 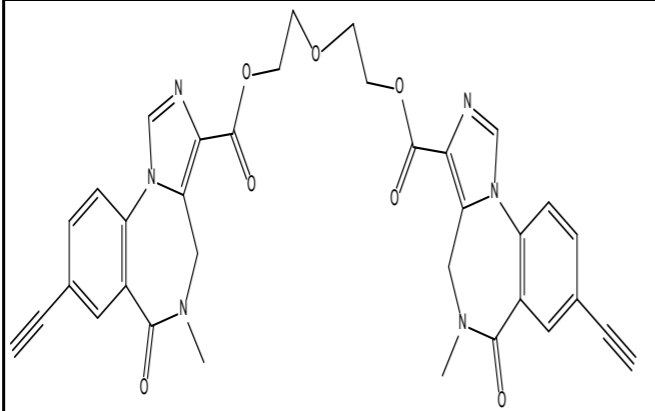<br><chem>C34H28N6O7</chem>      | Xli-347 C34H28N6O7   | 828.05 | 690.2  |       |  | 13.87 |      |
| <br><chem>C20H19ClN2OSi</chem>   | XLI-348              | 13.56  | 11.17  | 1.578 |  | 82.05 |      |
| <br><chem>C17H11ClN2O</chem>    | XLI350 C17H11ClN2O   | 1.224  | 1.188  |       |  | 2.9   |      |
| <br><chem>C21H21ClN2OSi</chem> | XLI351 C21H21ClN2OSi | 1.51   | 0.97   |       |  | 1.98  |      |
| <br><chem>C18H13ClN2O</chem>   | XLI352 C18H13ClN2O   | 1.56   | 0.99   |       |  | 1.96  |      |
| <br><chem>C33H34N6O6</chem>    | XLI356 C33H34N6O6    | 1851.5 | 4702.5 | 8545  |  | 100.5 | 5000 |
| <br><chem>C22H21N3O2</chem>    | Xli366 C22H21N3O2    | 1      |        |       |  |       |      |

|                                                                                                                                |                   |       |       |       |       |  |  |
|--------------------------------------------------------------------------------------------------------------------------------|-------------------|-------|-------|-------|-------|--|--|
| 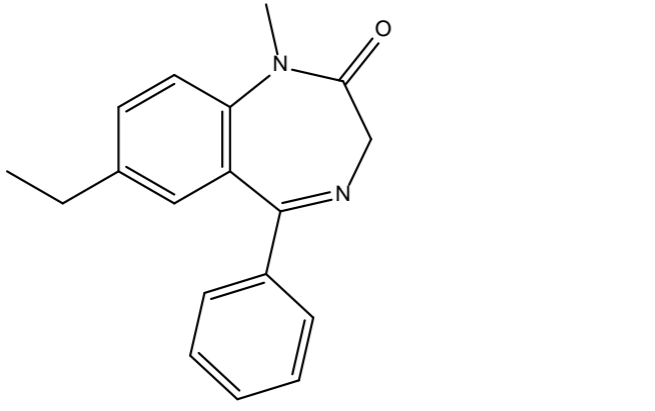 <p><math>C_{18}H_{18}N_2O</math></p>         | XLI368 C24H25N3O2 |       |       |       |       |  |  |
|  <p><math>C_{32}H_{24}N_6O_7</math></p>      | XLI-374           | 3795  | 2694  | 1864  | 76.14 |  |  |
|  <p><math>C_{13}H_{12}BrN_3O_2</math></p>   | XLI-379           | 1037  | 482.4 | 357.5 | 36.13 |  |  |
|  <p><math>C_{15}H_{12}ClN_3O</math></p>     | XLI-381           | 619.9 | 285.6 | 3639  | 7.1   |  |  |
|  <p><math>C_{28}H_{28}Br_2N_6O_4</math></p> | XLI-382           |       |       |       |       |  |  |
|  <p><math>C_{38}H_{46}N_6O_4Si_2</math></p> | XLI-385           |       |       |       |       |  |  |

|                                                                                     |                              |       |       |       |      |      |      |
|-------------------------------------------------------------------------------------|------------------------------|-------|-------|-------|------|------|------|
| 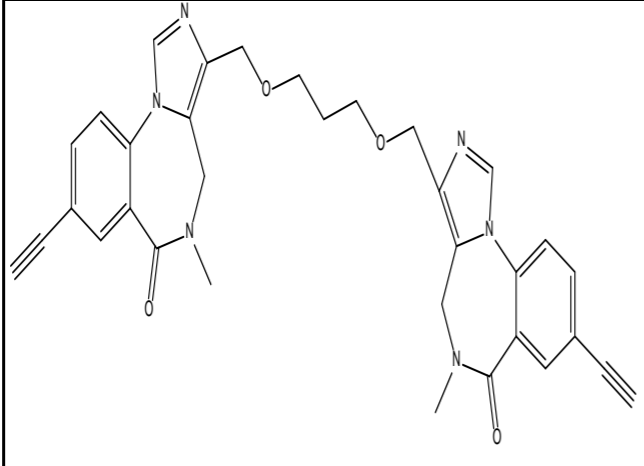   |                              |       |       |       |      |      |      |
| $C_{33}H_{30}N_6O_4$                                                                | XLI-387                      | 5454  | 5000  | 5000  | 5000 | 5000 | 5000 |
|    |                              |       |       |       |      |      |      |
| $C_{10}H_{10}N_2O_2$                                                                | XLI-4?                       |       |       |       |      |      |      |
|  |                              |       |       |       |      |      |      |
| $C_{15}H_{11}N_3O_3$                                                                | XLI-6TC                      | 2371  | 1421  | 1840  | 1169 |      |      |
|  |                              |       |       |       |      |      |      |
| $C_{20}H_{15}BrFN_2O_2$                                                             | XLI-8TC                      | 21.52 | 11.01 | 2.16  | 4.06 |      |      |
|  |                              |       |       |       |      |      |      |
| $C_{19}H_{13}ClN_4$                                                                 | XLI-JY-DMH ANX3              | 3.3   | 0.6   | 1.9   | 4.4  | 5000 |      |
|  |                              |       |       |       |      |      |      |
| $C_{22}H_{21}ClN_4Si$                                                               | XLI-JY-DMH-TMS C22H21N4SiCl) | 35    | 63    | 99.13 | 69.7 | 5000 |      |

|                                                                                                               |               |              |      |       |       |      |       |
|---------------------------------------------------------------------------------------------------------------|---------------|--------------|------|-------|-------|------|-------|
| 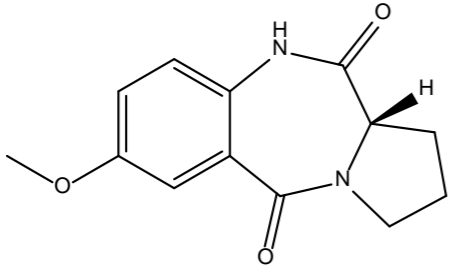<br>$C_{13}H_{14}N_2O_3$     | XLI-TC        | 8155         | 7528 | 1036  | 508.9 |      |       |
| <br>$C_{25}H_{25}N_3O_2Si$   | XliXHe-II-048 | C25H25N3O2Si | 5000 | 5000  | 5000  | 5000 |       |
| <br>$C_{20}H_{16}ClN_3O_2$ | XZ112         |              |      |       |       |      |       |
| <br>$C_{16}H_{10}N_4$      | YCT-5         |              | 2.2  | 11.46 | 16.3  | 200  | 10000 |
| <br>$C_{16}H_{10}N_4$      | YCT-7A        |              | 3    | 23.8  | 30.5  | 240  | 10000 |
| <br>$C_{16}H_{10}N_4$      | YCT-7B        |              | 28   | 118   | 156   | 1000 | 10000 |

|                                                                                                                 |           |       |        |       |       |
|-----------------------------------------------------------------------------------------------------------------|-----------|-------|--------|-------|-------|
| 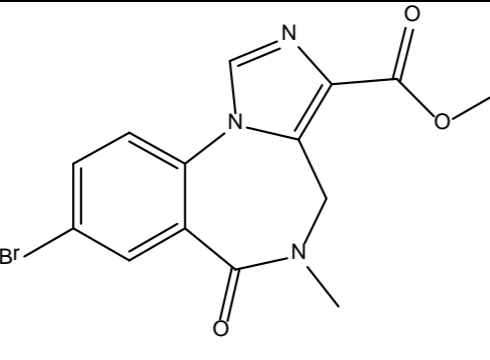<br>$C_{14}H_{12}BrN_3O_3$     | YT-5      | 0.421 | 0.6034 | 36.06 | 1.695 |
| <br>$C_{14}H_{12}ClN_3O_3$     | YT-6      | 15.31 | 87.8   | 60.49 | 1.039 |
| <br>$C_{18}H_{15}N_3O_3$      | YT-I-38   | 945.9 | 326.8  | 245.9 | 4.07  |
| <br>$C_{18}H_{14}BrN_3O$     | YT-II     | 6.93  | 0.87   | 3.51  | 5.12  |
| <br>$C_{18}H_{19}N_3O_3$     | YT-II-76  | 95.34 | 2.8    | 0.05  | 0.04  |
| <br>$C_{33}H_{28}Br_2N_6O_6$ | YT-II-791 | 1495  | 2681   | 527.4 | 144   |
| <br>$C_{34}H_{30}Br_2N_6O_6$ | YT-II-792 | 789.6 | 599.5  | 1698  | 83.18 |

|                                                                                                                 |           |       |       |       |       |
|-----------------------------------------------------------------------------------------------------------------|-----------|-------|-------|-------|-------|
| 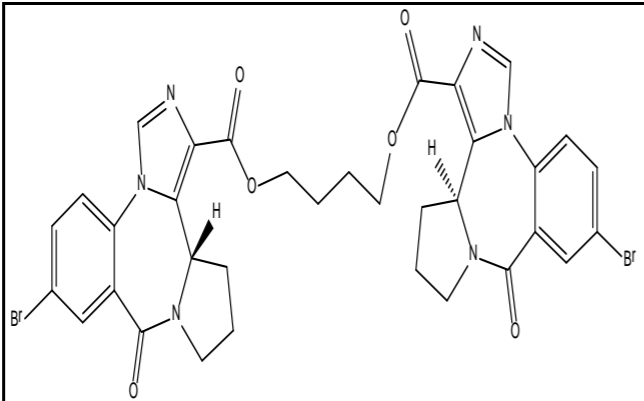<br>$C_{34}H_{30}Br_2N_6O_6$   | YT-II-793 | 1383  | 2881  | 782.6 | 128.9 |
| <br>$C_{34}H_{30}Br_2N_8O_4$   | YT-II-794 | 4536  | 126.2 | 4981  | 932.8 |
| <br>$C_{16}H_{16}ClN_3O_4$    | YT-II-83  | 32.74 | 13.22 | 24.1  | 3.548 |
| <br>$C_{30}H_{25}N_3O_5$     | YT-III-1  |       |       |       |       |
| <br>$C_{31}H_{26}BrClN_6O_6$ | YT-III-10 | 1172  | 1915  | 1481  | 282.9 |
| <br>$C_{36}H_{27}ClN_6O_5$   | YT-III-15 | 73.19 | 90.45 | 141.4 | 114   |

|                                                                                                                |            |       |       |       |       |
|----------------------------------------------------------------------------------------------------------------|------------|-------|-------|-------|-------|
| 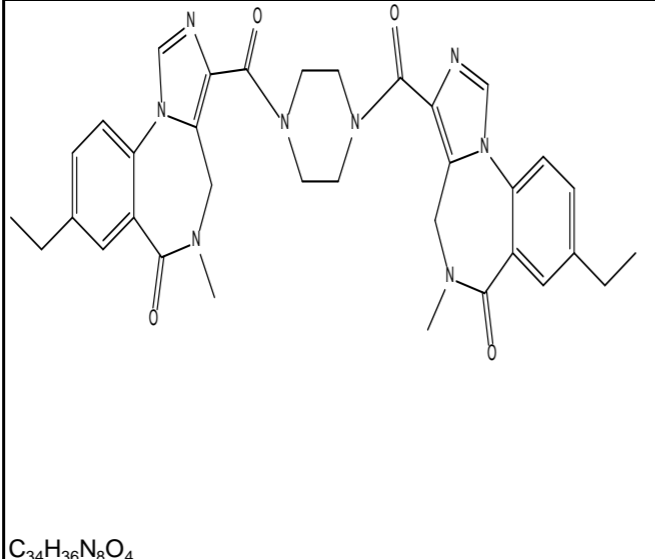<br>$C_{34}H_{36}N_6O_4$      | YT-III-19  | 5329  | 182.4 | 3817  | 3313  |
| <br>$C_{23}H_{21}N_3O_2$     | YT-III-23  | 19.83 | 23.65 | 19.87 | 1.105 |
| <br>$C_{18}H_{20}ClN_3O_4$  | YT-III-25  | 2.53  | 5.79  | 5.69  | 0.09  |
| <br>$C_{43}H_{28}F_2N_6O_4$ | YT-III-271 | 32.54 | 1.26  | 2.35  | 103   |
| <br>$C_{44}H_{30}F_2N_6O_2$ | YT-III-272 | 295.9 | 14.98 | 10.77 | 103.3 |
| <br>$C_{44}H_{34}F_2N_6O_4$ | YT-III-273 | 245.1 | 366   | 389   | 879.4 |

|                                                                                                                   |           |       |       |       |       |
|-------------------------------------------------------------------------------------------------------------------|-----------|-------|-------|-------|-------|
| 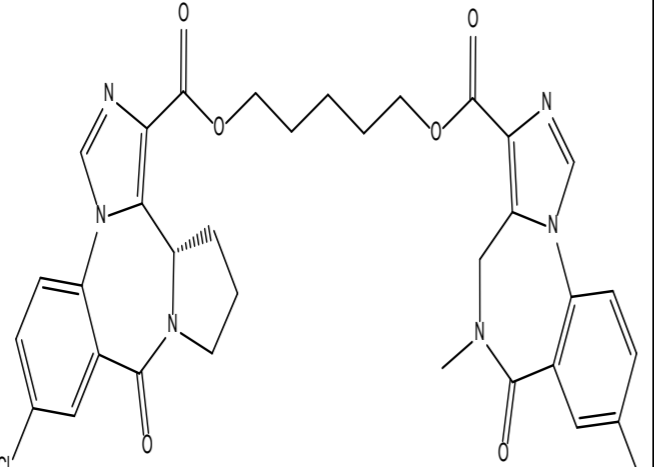<br><chem>C33H30Cl2N6O6</chem>   | YT-III-28 | 130.7 | 80.03 | 82.9  | 192   |
| <br><chem>C21H16N4O</chem>       | YT-III-31 | 36.39 | 67.85 | 129.7 | 7.59  |
| <br><chem>C23H20FN3O2</chem>    | YT-III-38 | 1461  | 18.21 | 14.63 | 3999  |
| <br><chem>C20H21N5O2</chem>    | YT-III-42 | 382.9 | 16.83 | 44.04 | 9.77  |
| <br><chem>C29H24Cl2N6O6</chem> | YT-TC-1   | 441.8 | 927.4 | 157.9 | 122.2 |
| <br><chem>C30H26Cl2N6O6</chem> | YT-TC-2   | 839.1 | 1647  | 568.1 | 421.9 |



|                                                                                                               |         |       |       |       |       |      |  |
|---------------------------------------------------------------------------------------------------------------|---------|-------|-------|-------|-------|------|--|
| 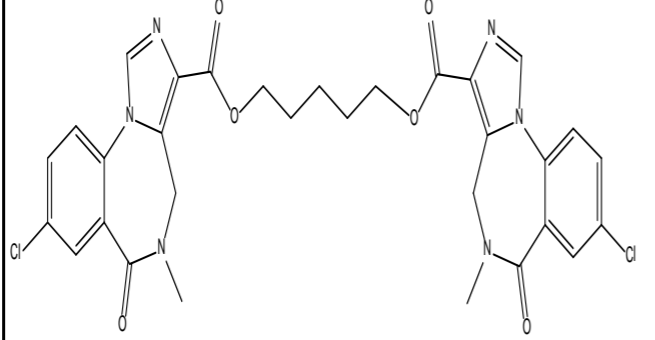<br>$C_{31}H_{28}Cl_2N_6O_6$ | YT-TC-3 | 141.4 | 11.43 | 118.1 | 29.22 |      |  |
| <br>$C_{30}H_{26}Cl_2N_8O_4$ | YT-TC-4 | 6291  | 3315  | 352.2 | 2881  |      |  |
| <br>$C_{17}H_{18}BrN_3O_3$ | ZG-168  | 11.2  | 10.7  | 9.2   | 0.47  | 9.4  |  |
| <br>$C_{17}H_{18}IN_3O_3$  | ZG-208  | 9.7   | 11.2  | 10.9  | 0.38  | 4.6  |  |
| <br>$C_{17}H_{18}N_4O_5$   | ZG-213  | 12.8  | 49.8  | 30.2  | 3.5   | 22.5 |  |
| <br>$C_{18}H_{18}N_4O_3S$  | ZG-224  | 17.1  | 33.7  | 50    | 2.5   | 30.7 |  |

|                                                                                                                  |                   |      |       |      |      |      |
|------------------------------------------------------------------------------------------------------------------|-------------------|------|-------|------|------|------|
| 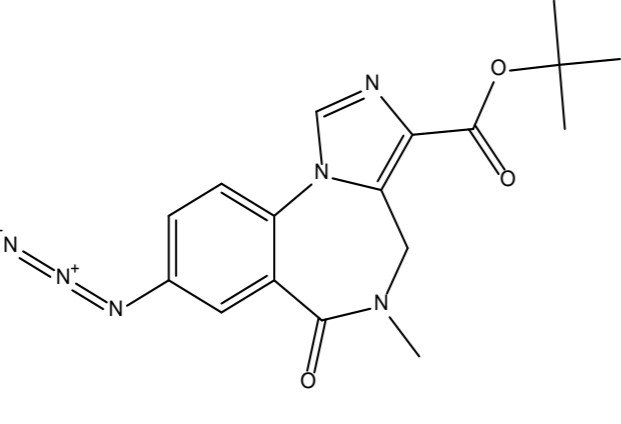<br><chem>C17H18N6O3</chem>     | ZG-234            | 7.25 | 22.14 | 9.84 | 0.3  | 5.25 |
| <br><chem>C17H16ClN6O3</chem>   | ZG-63A            | 17.3 | 21.6  | 29.1 | 0.65 | 4    |
| <br><chem>C15H14ClN6O3</chem> | ZG69A             | 6.8  | 16.3  | 9.2  | 0.85 | 54.6 |
| <br><chem>C15H14ClN6O3</chem> | ZG-69a(Ro15-1310) | 6.8  | 16.3  | 9.2  | 0.85 | 54.6 |
| <br><chem>C17H18N6O3</chem>   | ZG-88             |      |       |      |      |      |
| <br><chem>C23H18N6O</chem>    | ZJW-II-040        |      |       |      |      |      |
| <br><chem>C22H20N2O4</chem>   | ZK 93423          | 4.1  | 4.2   | 6    | 4.5  | 1000 |

|                                                                                                                                                                                        |          |      |     |     |  |       |       |
|----------------------------------------------------------------------------------------------------------------------------------------------------------------------------------------|----------|------|-----|-----|--|-------|-------|
| 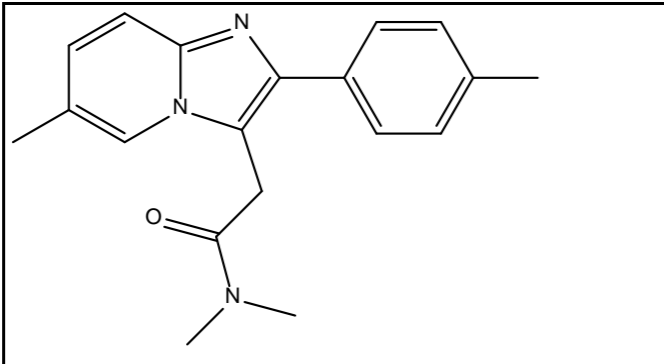 <p><chem>CN(C)C(=O)CC1=C(C2=CC=CC=C2)N3C=CC=C(C)N3</chem></p> <p><math>C_{19}H_{21}N_3O</math></p> | ZOLPIDEM | 26.7 | 156 | 383 |  | 10000 | 10000 |
|----------------------------------------------------------------------------------------------------------------------------------------------------------------------------------------|----------|------|-----|-----|--|-------|-------|
